# Supplementary material for: Physico-chemical characterization of urban aerosols from specific combustion sources in West Africaat Abidjan in Côte d’Ivoire and Cotonou in Benin in the frame of DACCIWA program
Source: Copernicus journal article supplement (doi:10.5194/acp-2019-406), 2019-06-11
Supplement: Supplementary file [file acp-2019-406-RC1-supplement.pdf]

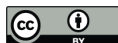

1 **Physico-chemical characterization of urban aerosols from specific combustion**  
2 **sources in West Africa at Abidjan in Côte d'Ivoire and Cotonou in Benin in the frame**  
3 **of DACCIWA program**

4

5 Aka Jacques Adon<sup>1</sup>, Catherine Liousse<sup>1</sup>, Elhadji Thierno Doumbia<sup>2</sup>, Armelle Baeza-Squiban<sup>3</sup>,  
6 Hélène Cachier<sup>1</sup>, Jean-Francois Léon<sup>1</sup>, Veronique Yoboué<sup>4</sup>, Aristique Barthel Akpo<sup>5</sup>, Corinne  
7 Galy-Lacaux<sup>1</sup>, Cyril Zouiten<sup>6</sup>, Hongmei Xu<sup>1,7</sup>, Eric Gardrat<sup>1</sup>, Sekou. Keita<sup>8</sup>.

8

9 <sup>1</sup> Laboratoire d'Aérodologie, Université de Toulouse, CNRS, UPS, Toulouse, France

10 <sup>2</sup> Centre National de Recherche Météorologique/Groupe d'étude de l'Atmosphère  
11 Météorologique, CNRS-Météo-France, Toulouse, France

12 <sup>3</sup> Université Paris Diderot, Unité de Biologie Fonctionnelle et Adaptative-RMCX, CNRS, UMR  
13 8251, Paris, France

14 <sup>4</sup> Laboratoire de Physique de l'Atmosphère, Université Félix Houphouët-Boigny, Abidjan BPV  
15 34, Côte d'Ivoire

16 <sup>5</sup> Laboratoire de Physique du Rayonnement, Université d'Abomey-Calavi, Abomey-Calavi,  
17 Bénin

18 <sup>6</sup> Géosciences Environnement Toulouse, Université de Toulouse, CNRS, UPS, Toulouse,  
19 France

20 <sup>7</sup> Department of Environmental Science and Engineering, Xi'an Jiaotong University, Xi'an,  
21 China

22 <sup>8</sup> Université de Khorogo, Khorogo, Côte d'Ivoire.

23

24 Correspondence to: [adonjacks@gmail.com](mailto:adonjacks@gmail.com) (J. Adon) and [lioc@aero.obs-mip.fr](mailto:lioc@aero.obs-mip.fr) (C. Liousse)

25

26

27

28

29

30



31

32 **Abstract**

33 Air pollution in West Africa has yet to be well characterized and was one of the principal  
34 motivations of the “Air Pollution and Health” work package in the DACCWA (Dynamics-  
35 Aerosol-Chemistry-Cloud Interactions in West Africa) program. Intensive measurement  
36 campaigns were performed in two West African capitals (Abidjan in Côte d’Ivoire and Cotonou  
37 in Benin), in order to examine the size distribution of particulate matter (PM) and their chemical  
38 composition (Elemental Carbon (EC), Organic Carbon (OC), Water-soluble organic carbon  
39 (WSOC), Water-soluble inorganic ions (WSI) and trace metals). In this study, we characterize  
40 PM from different sites in Abidjan, which are representative of Domestic Fires (ADF), Traffic  
41 (AT) and Waste Burning (AWB), as well as a Traffic site (CT) in Cotonou. These sites,  
42 impacted by a large volumes of pollution, are representative of the main combustion sources in  
43 south West Africa during the dry and wet seasons. To this end, intensive campaigns were run  
44 in Abidjan and Cotonou in July (2015 and 2016) and January (2016 and 2017).

45 Results show a well-marked seasonality and inter-annual variability and spatial  
46 variabilities with PM levels higher than the WHO guidelines of  $25\mu\text{g}/\text{m}^3$ . The average mass  
47 concentrations during the wet season were 90.3, 104.1, 69.1 and  $517.3\mu\text{g}/\text{m}^3$  at the AT, CT,  
48 AWB and ADF sites, respectively. The largest value at the ADF site is due to the contribution  
49 of food smoking and roasting activities. In the dry season, concentrations increase to 141.3,  
50 269.7 and  $175.3\mu\text{g}/\text{m}^3$  at the AT, CT and AWB sites respectively, whereas at the ADF site,  
51 concentrations decrease to  $375.7\mu\text{g}/\text{m}^3$ .

52 The chemical aerosol mass closure shows that dust contributed to 25-65% of PM at both  
53 the AT, CT and AWB sites, and 10-30% at the ADF site with a clear seasonal cycle. A large  
54 variability in Particulate Organic Matter (POM) is observed, ranging from 37-68% at ADF, 20-  
55 42% at AT, 10-34% at AWB and 15-22% at CT. The contribution of WSI to bulk PM (lower  
56 than 20%) is 2-3 times larger in the wet season than the dry, except at the ADF site where no  
57 season variation is observed. The most dominant species in the WSI fraction at ADF are  
58 chloride (18-36% of the total ions), potassium (8-22%) and calcium (13-25%), while at the rest  
59 of the sites, nitrate (21-36%), chloride (6-30%) and sulfate (9-20%) are dominant. At all sites,  
60 the proportion of EC is twice as high in the dry season as in the wet season. Carbonaceous  
61 aerosol (sum of EC and POM) and dust particles are the two major contributors to the coarse,



62 fine, and ultrafine particle fractions with carbonaceous aerosol predominant in Abidjan, while  
63 dust is predominant in Cotonou.

64 The highest carbonaceous aerosol contribution is observed at ADF (up to 75% of total  
65 PM), while at the other sites its contribution ranges between 18 and 35%. WSOC levels are the  
66 highest at the ADF site with more important values during the wet season. The concentrations  
67 of WSOC at the Abidjan traffic site are higher than those recorded at the Cotonou traffic site in  
68 the wet seasons, but lower in dry periods. Element trace characterization is also determined,  
69 showing predominance of Al, Na and Ca followed by Fe, K and Mg.

70 Our study highlights the contribution of different traffic emissions in two major West  
71 African cities to atmospheric aerosol composition. It also highlights the role of domestic fires  
72 and waste combustion sources. It constitutes an original database that characterizes urban air  
73 pollution from specific African combustion sources.

74 **Keywords:** DACCWA, atmospheric pollution, ~~size distribution~~, chemical composition,  
75 traffic, waste burning, domestic ~~fire~~, biomass burning.

76

## 77 1. Introduction

78 The impact of anthropogenic pollution on health has been demonstrated by numerous  
79 studies in Europe and North America which have contributed to the implementation of emission  
80 reduction policies. By contrast, air pollution in Africa is far from being well characterized,  
81 although it is suspected to be responsible for negative health outcomes (WHO). This is a major  
82 problem since Africa is an intense emitter of pollution including biomass burning domestic  
83 fires, car traffic and growing oil and mining industries. It also has one of the fastest growing  
84 populations in the world. Indeed, it has been shown that massive urbanization and rapid  
85 economic growth could be responsible for tripling anthropogenic emissions in Africa between  
86 2000 and 2030 (Lioussé et al., 2014). This results in a major degradation of air quality and an  
87 impact on the health of exposed populations. Only a few studies on this subject have been  
88 conducted in Africa (Val et al., 2013; Dieme et al., 2012; Kouassi et al., 2009).

89 Because of its high atmospheric particulate concentrations already measured to be of  
90 the same order as in Asian megacities and well above international standards of the WHO  
91 (World Organization Health) (WHO, 2014), and due to the complex mixture of pollutants from  
92 various origins, West Africa is an "unique laboratory" to study urban pollution. Previous studies



93 conducted under the framework of the AMMA (Analyses Multidisciplinaires de la Mousson  
94 Africaine) and POLCA (POLLution des Capitales Africaines) programs, have revealed very  
95 **high pollution concentration** levels in Cotonou (Benin), Bamako (Mali), Dakar (Senegal) and  
96 Yaoundé (Cameroun) during the dry season, suggesting that the population may be affected by  
97 **negative health outcomes**. For example, Val et al. (2013) showed that the inflammatory impact  
98 of combustion aerosol depends on the type of emission sources and determined the predominant  
99 role of particulate organic matter. **Moreover, fine and ultrafine aerosol fractions, as well as**  
100 **specific compositions including trace metals and organic compounds, have been shown to**  
101 **induce biological effects due to their ability to reach the distal lung (Cassee et al., 2013).** Such  
102 reasons highlight the need to better understand the size-speciation of aerosol chemical  
103 composition for the main African anthropogenic sources during the different seasons. In this  
104 context, the DACCWA (Dynamics-Aerosol-Chemistry-Cloud Interactions in West Africa)  
105 program, dedicated a specific work package to “Air Pollution and Health” dealing with  
106 pollutant characterization related to health issues through toxicological studies and  
107 inflammatory risk modeling. **The strategy was to measure aerosol chemical composition in two**  
108 **typical traffic-sampling sites, one in Abidjan (Côte d’Ivoire) and another one in Cotonou**  
109 **(Benin), which differ in terms of fleets, type of fuel used and quality of roads.**

110 In Cotonou, the majority of the population uses **motorbikes** for transportation, whereas in  
111 Abidjan the vehicle fleet is dominated by diesel engines. **Measurements were also performed**  
112 **at domestic fire and waste burning sites, both located in Abidjan.** Intensive campaigns have  
113 been organized during both the dry and wet seasons of January 2016 and 2017 in Abidjan and  
114 Cotonou. In this paper, we present ~~the aerosol chemical results for these cities and the different~~  
115 ~~studied combustion sources:~~ (i) PM size distribution and mass concentrations and (ii) PM  
116 chemical composition including carbonaceous aerosol, water-soluble organic carbon, water-  
117 soluble inorganic ions, dust and trace elements ~~for coarse, fine, ultrafine particles will be~~  
118 ~~detailed for all sites.~~

119

## 120 2. Experimental method

### 121 2.1. Experimental sites

122 **Four measurement campaigns have been performed in July 2015 (07/20-26 period-wet**  
123 **season) and January 2016 (01/7-15 period-dry season), July 2016 (07/4-13 period-wet season),**



5

124 and January 2017 (01/5-14 period-dry season) at Abidjan (Côte d'Ivoire) and Cotonou (Benin)  
125 at the four different source sites: ADF for Abidjan Domestic Fires, AWB for Abidjan Waste  
126 Burning, AT for Abidjan Traffic (Figure 1) and CT for Cotonou Traffic site (Figure 2).

127 The ADF site is situated in Yopougon Bracody district near a market (5° 19' 44" North, 4° 06'  
128 21" West) (Figure 1). This geographical area is highly populated with various small commercial  
129 activities such as a fish and meat-smoking by women which gives rise to air pollution. There  
130 are also many formal and informal settlements, which mainly use wood and charcoal as a source  
131 of fuel for private and professional activities. Other sources of concern contributing to the mix  
132 of pollutant emissions in the area include transportation-related emissions, biomass burning,  
133 garbage bins or small landfills, and various other fugitive sources.

134 The Abidjan traffic site, (AT) is located in Adjamé, on the roof of « 220 pharmacie logement  
135 building » (5° 21' 14" N, 4° 01' 04" W), 10 m above ground level, and roughly 10 m away from  
136 the main road. This site, close to the Adjamé market and to a bus station, is thus highly affected  
137 by traffic (Gbaka, bus, taxi, woro-woro, personal cars...). The Abidjan waste Burning site  
138 (AWB) (5° 21' 12" N, 3° 56' 16" W) is located at Akouédo in the district of Cocody, on the roof  
139 of « Talafigué », a building 15 m above ground level. This site is close to the big waste burning  
140 area of Abidjan established in 1965, which covers an area of 153 ha.

141 The Cotonou Traffic (CT) (6° 22' 19" N, 2° 26' 5.143" E) site is located in Cotonou, on the  
142 «Sogema» building roof, 4m above ground level. This site is close to the Dantokpa market and  
143 also to the biggest crossroad of Cotonou (intersection of 4 main roads). This site is highly  
144 influenced by traffic activities. It is important to note that vehicle fleet and fuels are different  
145 in Cotonou than in Abidjan since (1) there are many two-wheel vehicles in Cotonou, (2) in  
146 Cotonou, gasoline is of poor quality due to the illegal fuel transport from Nigeria (Figure 3) and  
147 (3) the roads are in worse condition in Cotonou than in Abidjan.

## 148 2.2. Measurements

149 The collection of aerosol filter samples was performed with three cascade impactors,  
150 operating in parallel for 3 hours over three days for each intensive campaign to allow size-  
151 speciated characterization of the aerosol chemical composition. The first 4-stage impactor  
152 included 4 quartz fiber filters (QMA, Whatman), for carbonaceous aerosol (EC, OC and WSOC  
153 analysis), with three filters of 47mm size for the upper stages and 1 of 70 mm for the lower  
154 stage. The second 3-stage cascade impactor was equipped with three Teflon filters (Zefluor,  
155 Pall Corporation®) of 25 mm size and was dedicated for aerosol mass, water-soluble ions



156 species and trace elements. Finally, the third 4-stage cascade impactor dedicated to  
157 toxicological analyses and whose results are not used in this paper, was mounted with four 47  
158 mm diameter filters and a 70 mm filter in Nuclepore polycarbonate filters quality (porosity 1  
159  $\mu\text{m}$ ).

160 Note that filters were pooled in each case to allow a UF ( $<0.2 \mu\text{m}$ ), F [(0.5-0.2 $\mu\text{m}$ ) and C ( $>2.5$ -  
161  $1 \mu\text{m}$ ) classification. Chemical characterization included aerosol mass, EC, OC, Water Soluble  
162 Organic Carbon, Water Soluble Ionic species and trace elements.

## 163 2.3. Analyses

### 164 2.3.1. Gravimetric analyses

165 Aerosol mass concentrations are obtained using a high-precision balance (SARTORIUS  
166 MC21S) in Toulouse, France, at Laboratoire d'Aérodologie, placed under a controlled  
167 temperature and humidity atmosphere (Person and Tymen, 2005). Before weighing, the filters  
168 are kept about for 24 hours in the weighing room at an ambient relative humidity of  $30 \pm 15\%$ .  
169 The filters are weighed before and after sampling. Result of a gravimetric measurement consists  
170 of the average of 2 to 4 weighings whose differences do not exceed  $5 \mu\text{g}$ . The standard error on  
171 a gravimetric measurement is therefore less than  $10 \mu\text{g}$ , typically representing less than 5% of  
172 the particles mass.

### 173 2.3.2. Carbonaceous aerosols

174 Carbonaceous aerosol is obtained from a thermal analysis with a two-step method  
175 adapted from Cachier et al. (1989). Two aliquots of the same filter are separately analyzed.

176 One portion is directly analyzed for its total carbon content (TC). The other portion is  
177 first submitted to a pre-combustion step (2 h at  $340^\circ\text{C}$  under pure oxygen) in order to eliminate  
178 OC, and then analyzed for its BC content. Organic carbon (OC) concentrations are calculated  
179 as the differences between TC and BC. Note that the aerosol carbon content is quantified by a  
180 non-dispersive infrared (NDIR) detector with G4 ICARUS instrument with a detection limit of  
181 the order of  $2 \mu\text{gC}/\text{cm}^2$ . Uncertainty is of the order of 5% for TC, whereas, in the range of 5-  
182 20%, for BC and OC, depending on the sites.

### 183 2.3.3 Water Soluble Organic Carbon analysis

184 WSOC measurements are performed using a total organic carbon analyzer (Sievers M9).  
185 A detailed description of this technique is reported in Favez et al. (2008). Briefly, in this



7

186 ~~instrument~~, the full oxidation of ~~organic carbon~~ into CO<sub>2</sub> is obtained by coupling chemical  
187 oxidation (with ammonium persulphate) and UV light. CO<sub>2</sub> is then quantified by conductivity.  
188 Analyses are conducted on 20 ml of solution extracts. For **ultrafine** samples, solutions to be  
189 analyzed are obtained using a total filter surface of 3cm<sup>2</sup> (6x0.5 cm<sup>2</sup> punches symmetrically  
190 taken out of each QMA filter), whereas, for coarse and fine sizes, due to the geometry of the  
191 spots formed at the surface of the filters, samples are **divided into equivalent parts (1/2 or 1/4**  
192 **of filters, rest of carbonaceous analysis)**. The extraction protocol consists in a 16h soaking under  
193 soft shaking in an Erlen-Meyer containing 20mL of ultra-pure water. Prior to WSOC analysis,  
194 water extracts are filtered through Teflon (PTFE) filters (0.2µm pore size diameter) in order to  
195 remove any suspended particle. Measurement uncertainty, given by the manufacturer, is of the  
196 order of 7%. The overall calculated blank value is of the order of 2.27 ± 0.33 µgC/cm<sup>2</sup>, which  
197 represents 16.4± 8.5% of the mean WSOC content. For each sample, duplicate analyses showed  
198 a good reproducibility.

#### 199 **2.3.4 Water-soluble ionic species**

200 Water-soluble ionic species (Na<sup>+</sup>, NH<sub>4</sub><sup>+</sup>, K<sup>+</sup>, Mg<sup>2+</sup>, Ca<sup>++</sup>, SO<sub>4</sub><sup>2-</sup>, NO<sub>3</sub><sup>-</sup>, Cl<sup>-</sup>) ~~are~~ analyzed using  
201 ion chromatography (IC) ~~analyzer~~, following the analytical protocol described in Adon et al.  
202 (2010). Briefly, the aerosol water-soluble fraction is first extracted from half Teflon filter (the  
203 other part is used for trace element analysis), with a 10 min sonication in plastic vials including  
204 6 ml or 10 ml of purified water (with a controlled resistivity of 18.2MΩ). Then ~~such~~ vials are  
205 ~~submitted~~ to ionic chromatography analysis or stored at +4°C if not analyzed immediately.  
206 Cations are analyzed with Dionex DX-100 and anions with Dionex DX-500 with a detection  
207 limit of 1 to 6 ppb depending on ionic species. Uncertainties in the range of 1-50% is found  
208 depending on ionic species.

#### 209 **2.3.5 Trace elements**

210 **Half sampled Teflon filters** are mineralized by acid digestion with a 10 ml concentrated  
211 HNO<sub>3</sub> and 0.5 ml HF solution (Lamaison, 2006) using a closed vessel microwave accelerated  
212 reaction system (MARS 5, CEM Corporation) at high pressure (700 psi) (Celo et al. 2010). The  
213 digestion is realized in 3 steps: a rise in temperature at 130°C in 3min and holding for 1 min,  
214 then, a second rise at 160°C in 1 min and holding for 30 seconds and finally a third rise to  
215 180°C in 1 min and holding for 3min. After a 12 h cooling period, the solutions are evaporated  
216 at 80°C, and concentrated in 7 ml of 2% concentrated HNO<sub>3</sub> solution, before analysis by ICP-  
217 MS. This protocol is developed and performed at the Laboratory of Environmental Geosciences



218 of Toulouse. ICP-MS analyses are performed with a 7500 ce Agilent Technologies instrument  
219 equipped with a collision cell, and using In and Re as internal standards. Quality control and  
220 measurement performance are checked using NIST SRM 1648 ‘‘Urban Particulate Matter’’.  
221 The detection limit is less than 10 ppt. For all the samples, the final blank values and detection  
222 limit on filters are taken into account for final concentrations calculations. 13 trace metals are  
223 considered in this work: Al, Ti, Cr, Mn, Fe, Ni, Cu, Zn, Ba, La, Th, Pb, and Cd.

### 224 **2.3.6 Dust calculation**

225 Many methods can be used to quantify the dust concentrations in our samples.

226 (1) Sciare et al. (2005) methodology consists in using soluble calcium data obtained with  
227 Ionic Chromatography (IC) to estimate Dust mass following the relationship:

228  $\text{Dust} = 10.96 \pm 1.00 [\text{nss-Ca}^{2+}]$ , where  $\text{nss-Ca}^{2+} (=1.02*\text{Ca}^{2+}-0.038*\text{Na}^+)$  refers to non-sea-salt  
229 calcium concentration.

230 (2) Pettijohn (1975) and Besombes et al. (2001) propose the following equation:

231  $\text{Dust} = 2.20[\text{Al}] + 2.49[\text{Si}] + 1.63[\text{Ca}] + 1.42[\text{Fe}] + 1.94[\text{Ti}]$

232 (3) Terzi et al. (2010) used this one:

233  $\text{Dust} = 1.89[\text{Al}] + 1.21[\text{K}] + 1.95[\text{Ca}] + 1.66[\text{Mg}] + 1.7 [\text{Ti}] + 2.14[\text{Si}] + 1.42[\text{Fe}]$ .

234 In our study, all these elements needed for (2) and (3) have been determined except Silica (Si).  
235 Consequently, we used different relationships available in the literature to determine mean Si  
236 values ( $\text{SiO}_2 = 3*\text{Al}_2\text{O}_3$  mass ratios (Alastuey et al., 2005),  $\text{Si} = 4.0*\text{Al}$  (Zhang et al., 2003) and  
237  $\text{Si} = 2.03*\text{Al}$  (Chiapello et al., 1997)).

238 (4) Guieu et al (2002) relationships are based on Al or Fe:

239  $[\text{Al}] (\%) = 7.09 \pm 0.79[\text{dust}]$

240  $[\text{Fe}] (\%) = 4.45 \pm 0.49[\text{dust}]$

241 (5) Guinot et al. (2007) approach is based on a chemical closure method based on  
242 reconstructed aerosol mass from EC, OC, WSI,  $\text{Ca}^{2+}$  concentrations and weighed aerosol mass.

243 Briefly,  $\text{Ca}^{2+}$ -to-dust conversion factor (f) is obtained by arbitrary fixing OC-to-POM  
244 conversion factor (k) to 1.8 and by performing a linear regression between  $\text{Ca}^{2+}$  concentration  
245 and the missing mass (difference between the reconstructed and weighed mass). The slope of  
246 this regression represents the factor f. Based on this methodology, f ranges from 0.015 to 0.15  
247 in the wet season and from 0.006 to 0.07 in the dry season in our sites. Note that at all of our  
248 sites, the correlation between  $\text{Ca}^{2+}$  and missing mass is sufficiently good ( $r^2=0.9$ ) to support the  
249 consistency of this simple approach for the evaluation of dust. These f values are included in





250 the range of values provided in the literature (He et al. 2001; Sun et al. 2004; Guinot et al.  
251 2007).

252 The results of dust masses estimated from the six methodologies described above are  
253 summarized in the Table 1 for WS2016 and DS2017. Indeed, Ca, Al, and Fe concentrations  
254 measured by ICP-MS are only obtained in WS 2016 and DS 2017 due to experimental  
255 problems, whereas Ca<sup>2+</sup> concentrations measured by IC are available for all campaigns. As a  
256 result, the dust obtained from Ca<sup>2+</sup> measured by IC (Sciare et al., 2005 and Guinot et al., 2007)  
257 is lower than that obtained from Al and Fe by Guieu et al. (2002), by Pettijohn (1975) and by  
258 Terzi et al. (2010). In addition, dust obtained from Al is generally higher than that of Fe.

259 Such comparison seems to be in agreement with methodological aspects. Indeed, Al, Fe, Ca  
260 obtained by ICP-MS include both soluble and insoluble particles whereas Ca<sup>2+</sup> measured by IC  
261 only include soluble particles. Comparison of Ca<sup>2+</sup> measured by ICP-MS (not shown here) is  
262 effectively higher than that of the CI, by a factor of 1.7, 1.8, 2.2 and 1.1 in dry season, at the  
263 ADF, AWB, AT, and CT sites respectively. By contrast, this factor is constant (1.3) in the wet  
264 season for all the sites.

265 In our study, due to the lack of trace element data for the WS2015 and the DS2016, dust  
266 estimations will be performed from Sciare et al. (2005) methodology. This is the most direct  
267 one, taking into account available chemical data. The one of Guinot et al. (2007) will be used  
268 for aerosol chemical closure.

### 269 2.3.7 Aerosol chemical closure methodology

270 As mentioned previously, aerosol chemical closure is performed following the Guinot  
271 et al. (2007) methodology. Aerosol is separated into four components: EC, POM, water-soluble  
272 ionic species and Dust. EC is directly given by thermal analysis as shown earlier. WSI is the  
273 sum of all ionic species obtained by ionic chromatography. Particulate organic matter (POM)  
274 values are obtained from our OC concentrations with a POM/OC ratio in the range of 1.2 to 2.1  
275 whereas dust is derived from Ca<sup>2+</sup> and linear regression between reconstructed and weighed  
276 aerosol masses.

277

## 278 2.4 Meteorological conditions

279 Figure 4 shows meteorological data, provided by the NOAA Integrated Surface database  
280 (ISD; see <https://www.ncdc.noaa.gov/isd>, last access : ) and the ASECNA (Agence pour la  
281 Sécurité de la Navigation Aérienne en Afrique et à Madagascar).



282 Our study area is under the influence of the Convergence Zone of two air masses of a different  
283 nature; harmattan (hot and dry continental trade winds) from the north and monsoon (humid  
284 maritime trade winds) from the south (Figure 4). Ground contact between these two air masses  
285 constitutes the intertropical front (FIT) whose fluctuations during the year determine the  
286 seasons in the Gulf of Guinea (Tapsoba, 1997). During the winter (dry season), temperatures  
287 are relatively high with maximum around 30°C on the coast. The humidity is low, since the  
288 prevailing Harmattan wind blows from the desert, usually bringing dust (Figure 4). The period  
289 from June to September, especially in July is the wet season period when daytime temperatures  
290 are slightly lower, with maximum around 26/28°C on the coast. The humidity level is high  
291 everywhere. Rains may be abundant from April to October but also in March, November, and  
292 December on the coast.

293 As depicted in Figure 4 which shows the meteorological conditions during our four campaigns,  
294 temperatures are roughly the same at Abidjan and Cotonou, reaching 28°C and 26°C in the dry  
295 and wet seasons, respectively. The wind direction is relatively stable in summer and winter,  
296 except in January 2016 when there were slight variations. In addition (not shown here), our  
297 dry season periods are particularly dry with January rainfall lower than 3 mm. Also, precipitation  
298 during the wet season of 2015 was roughly similar to that of the wet season of 2016 in Abidjan  
299 and Cotonou.

## 300 **2.5 Backward trajectories**

301 ~~Air mass trajectory study is a very important tool to reconstruct the path of an air mass~~  
302 ~~for the days preceding its arrival at the sampling site.~~ The air mass trajectories used in this study  
303 are calculated with a model (READY Transport & Dispersion Modeling) developed at the Air  
304 resources laboratory. The Hybrid Single-Particle Lagrangian Integrated Trajectory (HYSPLIT)  
305 modelling system (Draxler and Rolph, 2012) is used for the trajectory analysis. Global Data  
306 Assimilation System reanalysis database is used as meteorological input, with a 0.25 × 0.25  
307 degrees horizontal resolution. In our study, the HYSPLIT model is run to compute 120 h back  
308 trajectories ending at Abidjan and Cotonou at 1000 m a.g.l. (Figure 5).

309 As expected in January, the air masses mainly came from the north (Figure 5) and some from  
310 the south-west, whereas in July the air masses came from the south-west and the south.  
311 Therefore, in January, Abidjan and Cotonou are mainly impacted by polluted air masses from  
312 surrounding areas and northern countries with possible dust and biomass burning influences,  
313 whereas in July, the impact of cleaner air masses coming from the sea may be observed.

314



### 315 3. Results and discussion

#### 316 3.1. Aerosol size distribution and mass concentration

317 Figure 6 shows the relative mass distribution of PM for Coarse (C), Fine (F) and Ultra-  
318 Fine (UF) particle sizes, with their average by site, for each season and campaign in Abidjan  
319 and Cotonou. Bulk concentrations, shown in Figure 6, vary widely from site to site and from  
320 year to year. During the wet season, the average total concentrations range from 82.1 to 676.3  
321  $\mu\text{g}\cdot\text{m}^{-3}$  in 2015 and 56.3 to 358  $\mu\text{g}\cdot\text{m}^{-3}$  in 2016, with the maximum at the Abidjan Domestic Fire  
322 (ADF) site. While during the dry season, values range from 168.2 to 269.4  $\mu\text{g}\cdot\text{m}^{-3}$  in 2016 and  
323 from 114.4 to 558.8  $\mu\text{g}\cdot\text{m}^{-3}$  in 2017, with maximum concentration obtained at the Cotonou  
324 Traffic (CT) and ADF sites. In terms of size distribution, concentration peaks may be observed  
325 for the three aerosol size-fractions, ultra-fine (UF), fine (F) and coarse (C), which are found to  
326 exhibit different seasonal patterns. UF particles ( $< 0.2 \mu\text{m}$ ) represent the highest contributor to  
327 the bulk mass at the ADF site, by up to 60 % (335.3  $\mu\text{g}\cdot\text{m}^{-3}$ ) in the dry season 2017. F particles  
328 (1-0.2  $\mu\text{m}$ ) are the second most important contributor and both combined particle sizes account  
329 for more than 70 % of the total mass at the ADF site. Ultra fine and fine fraction are also found  
330 to be maximum during the wet season in 2015 and 2016 by up to 47 and 44%, respectively.  
331 These results highlight the importance of pollution at the ADF site in Abidjan, which is  
332 dominated by particle sizes less than 1  $\mu\text{m}$  that are known to be particularly harmful to health  
333 (Kim et al., 2003; Wilson et al., 2002). Val et al. (2013) also indicates that combustion sources  
334 such as domestic fire contributes to the high toxicity of F and UF particulate matters of African  
335 urban aerosol. When looking at the seasonal variation for a full year i.e. 2016, the bulk mass is  
336 twice as high in wet season than in the dry season at the ADF site. This could be related to  
337 activities such as women drying fish and meat before selling them who use wood combustion;  
338 in wet season the woods are moist and combustion is highly incomplete, producing a large  
339 amount of smoke.

340 Bulk aerosol concentrations measured at the Abidjan Waste Burning (AWB) site in summer  
341 and winter 2016 are 56.3 and 173.8  $\mu\text{g}\cdot\text{m}^{-3}$ , respectively, which suggests less waste burning  
342 activities during the wet season. Also, the total concentrations obtained during the wet season  
343 of 2015 and 2016 were always lower than during the dry season of 2016 and 2017. It is also  
344 observed that at the AWB site, PM mass concentrations are mainly distributed in C mode (30-  
345 44%) over the entire period of study excepted during the wet season of 2015, and to a lesser  
346 extend in F mode (21-44%).



347 Note that the concentrations obtained at the AWB site ( $82.18 \mu\text{g}\cdot\text{m}^{-3}$ ) are the lowest compared  
348 to all sites. This could be explained by the proximity of the site to the studied source (here waste  
349 burning source) which is more important than in the other sites.

350 Now, if we focus on traffic sites (Figure 6), the Cotonou traffic site aerosol concentrations are  
351 higher by a factor of 1.5 to 2 than those of Abidjan traffic, especially in the dry season. Note  
352 that this poor air quality found in Cotonou has recently been reported by Cachon et al. (2014).  
353 The higher values found in Cotonou could be due to the more intense traffic in Cotonou than in  
354 Abidjan which is associated with the lack of public transportation and the use of highly polluted  
355 mopeds (aged over 15 years) (Gounougbe, 1999; Avogbe et al., 2011), despite the effort in the  
356 last 10 years to restrict their use. Several studies such as MMEH (2002) have shown that more  
357 than 94,000 mopeds and 350,000 second-hand vehicles are in circulation in Cotonou. Other  
358 factors contributing to the local pollution include outdoor restaurants using charcoal and  
359 motorcycle garages which are more present around the Cotonou site than at the Abidjan site.  
360 However, the differences in concentrations between the two traffic sites are less important  
361 during the wet season than during the dry season when concentrations are always higher.  
362 Therefore, another factor, typical of the dry season should explain the differences between  
363 concentrations. One such factor is the influence of long-term imported sources. Indeed, the  
364 occurrence of continental air masses is more important in the dry season than in the wet season.  
365 Some expected PM components such as dust or biomass burning particles would then appear  
366 to be relatively more important in Cotonou than in Abidjan. This will be discussed in more  
367 detail later.

368 In terms of PM 2.5, the conclusions are the same. The average mass concentration of PM2.5  
369 over the dry season (2016-2017) are  $154.30 \pm 73.99$ ,  $143.8 \pm 41.6$ ,  $134.1 \pm 6.7$  and  $211.1 \pm 50.9$   
370  $\mu\text{g}\cdot\text{m}^{-3}$  and  $337.5 \pm 23.8$ ,  $44.8 \pm 2.9$ ,  $52.3 \pm 3.8$  and  $70.0 \pm 0.8 \mu\text{g}\cdot\text{m}^{-3}$  over the wet season (2015-  
371 2016) at the ADF, AWB, AT and CT sites, respectively. The increase in PM2.5 is of the order  
372 of 54% at ADF from dry to wet season, whereas a sharp reduction (more than 60%) is obtained  
373 at AWB, AT, and CT sites. As shown previously, such differences in PM2.5 concentrations  
374 between the sites can be explained by (1) the source specificity with more or less incomplete  
375 combustion: wood combustion and two wheel vehicle emission factors are higher than gasoline  
376 emission factors (Keita et al., 2018), (2) the proximity between the sites and the sources: the  
377 ADF sampling site is much closer to the studied sources than the traffic or waste burning  
378 sampling sites (3) the relative influence of transported sources to the studied sites such as dust  
379 and biomass burning (4) the occurrence of continental air masses, (5) the decrease of the



380 boundary layer height (as reported by Colette et al., 2007), (6) wet deposition of particles and  
381 (7) the meteorological conditions (temperature and relative humidity).

382 It is interesting to underline that all of these values are well above the annual and daily WHO  
383 guidelines of 25 and 10  $\mu\text{g}/\text{m}^3$  respectively, whatever the season and the size; this is a warning  
384 signal for pollution levels in African capitals if nothing is done to reduce emissions in the future.  
385 Finally, it is interesting to compare our results with other DACCWA results, including other  
386 time sampling. Firstly, Figure 7 presents comparisons between our PM<sub>2.5</sub> mass concentrations  
387 and those obtained by Xu et al. (2019) from personal samplers collected in the same area and  
388 at the same dates in 2016 during 12h from women at the ADF site, students at the AWB site  
389 and drivers at the CT site. We note that PM<sub>2.5</sub> directly measured on women are 2.3 and 0.9  
390 times higher than our values obtained at the ADF site in dry and wet seasons, respectively, and  
391 3.40 and 4.9 times higher on students than at the AWB site, and 1.6 and 2.1 times higher on  
392 drivers than at the CT site.

393 Secondly, Figure 7 presents a comparison between our values and Djossou et al. (2018) weekly  
394 measurements at the same sites. It is interesting to note that our values are on average 1.6, 3, 5  
395 and 8 times higher than those of Djossou et al. (2018) at the AWB, ADF, AT and CT sites  
396 respectively. As it may be seen, the lowest concentrations are observed in Djossou et al. (2018),  
397 whereas the highest concentrations are recorded in Xu. et al. (2019). This is valid for all sites,  
398 seasons and campaigns. Differences between our values and Djossou values may be explained  
399 by the sampling times of the two studies. Indeed, Djossou measurements are weekly, taking  
400 into account diurnal activities during all the week, including week-end and nights which have  
401 expected lower PM<sub>2.5</sub> concentrations. Our study includes only maximum pollution conditions  
402 for each site. The highest differences occur for the traffic sites. This may be clearly understood  
403 since diurnal and weekly variations of traffic sources are the most variable. Comparison  
404 between our values and Xu et al. (2019) values is also interesting. Indeed, it is at the ADF site  
405 that on-site and women PM<sub>2.5</sub> concentrations are the closest which shows that this site is the  
406 most representative of the pollution exposure to women. The biggest differences are found at  
407 the AWB site. As already mentioned, distance from the site to the waste burning source is more  
408 important than for other sites, which explains why student concentrations are much higher than  
409 on-site concentrations. At the Cotonou traffic site, measurements taken from people are also  
410 higher than on site measurements. Such differences can be also explained by additional  
411 pollution exposure as people move around. Note that the sampling technique may also play a  
412 role in such a comparison.



413 Finally, Table 2 compares our PM<sub>2.5</sub> results to literature data for different traffic sites in the  
414 world including the same daily sampling time. It is interesting to note that our values are  
415 situated at the higher end of the range of PM<sub>2.5</sub> data observed from the other sites.

## 416 **3.2 Aerosol chemical composition**

### 417 **3.2.1 Carbonaceous aerosol Concentrations.**

#### 418 **3.2.1.1 EC and OC variation.**

419 In Figure 8, EC values are presented by size and site for each campaign and season: wet  
420 season 2015 (WS15), wet season 2016 (WS16), dry season 2016 (DS16) and dry season 2017  
421 (DS17). The most striking feature is that the ADF site concentrations are always higher than at  
422 the other sites in the wet seasons, whereas only slightly higher or of the same order in the dry  
423 seasons. Concentrations at the traffic CT site is slightly higher than at the AT site, whereas the  
424 lowest concentrations are found at the AWB site. As for PM mass, these differences are mainly  
425 due to the proximity of the site to the sources, where the ADF site is much closer to the sources  
426 than the AT and CT sites which are located at the first level of a building at a crossroad, and  
427 the AWB site which is the farthest from the source. The strength of each source is another factor  
428 which can explain EC concentration variations among the sites. High concentrations at traffic  
429 sites may be explained by high EC emission factors observed for vehicles (Keita et al., 2018),  
430 whereas differences between wet and dry season concentrations at the ADF sites may be  
431 explained by EC emission factor variations: higher EC emission factor values are obtained for  
432 moist wood combustion mostly occurring during the wet season than for dry wood combustion,  
433 as mentioned previously.

434 Results of the EC size distribution are very consistent among the different sites. Whatever the  
435 site and the season, higher EC concentrations are found in C and UF particles compared to F  
436 particles, with maximum values in UF particle as found in previous studies (Marinoni et al.,  
437 2005; Xiu et al., 2015).

438 In terms of seasonal variation, our results are in agreement with long-term EC measurements  
439 conducted by Djossou et al. (2018) for the same sites and period. There is no marked seasonal  
440 variation for the ADF site with EC peaks in WS 2016 and DS 2017. As mentioned, wet season  
441 EC peaks can be explained by the use of moist wood for cooking and smoking fish. For the  
442 other sites, higher EC values are observed during the dry season rather than in the wet season



443 due to (1) decreases in EC wet deposition and concentration during the wet season and (2) the  
444 influence of long-range transport from sources such as biomass burning during the dry season.  
445 In terms of inter-annual variability, if we compare WS2015 and WS2016, values are slightly  
446 higher in 2015 than in 2016 at the AT, CT and AWB sites. However, at the ADF site, EC  
447 maximum values are observed in 2016, especially for UF particles. This is due to the source  
448 which has more polluting combustion activities as previously explained. Indeed, in 2015, the  
449 activities of fish and meat smoking were recent and not very well known by the population,  
450 whereas they were expanded in 2016 with more workers, leading to more furnaces and  
451 increased emissions.

452 EC concentrations are generally higher in DS2017 than in DS2016 for all the sites. This is not  
453 due to the meteorology which is similar in both years. This is also not due to biomass burning  
454 impacts. Indeed, when looking at MODIS burnt areas ([http://www.aeris-  
455 data.fr/redirect/MODIS-MCD64A1](http://www.aeris-data.fr/redirect/MODIS-MCD64A1)), burnt areas of west African savannas are higher in 2016  
456 than in 2017. Therefore, EC concentrations should be higher in 2016. However, analysis of  
457 back trajectories (Figure 4) reveals that biomass burning transport from northern areas are less  
458 efficient in 2016 than in 2017, in both Abidjan and Cotonou. This leads to a counter effect  
459 between biomass burning emission strength and air mass transport, indicating that biomass  
460 burning impact could not explain the difference in EC between DS2016 and DS2017. Rather,  
461 this is due to the variability of local sources. In DS2016 there was a general strike of civil  
462 servants of the State with important consequences on urban activities: lower traffic and lower  
463 fish smoking emissions were observed in DS2016 compared to DS2017, thus explaining the  
464 lower EC concentrations at AT. Less activities were also noticed at CT.

465 OC size-speciated concentrations are presented in Figure 9 for each site and each campaign.  
466 ADF OC values are always higher than at the other sites by a factor ranging from 6 to 30, for  
467 all seasons and particle sizes, with highest values in DS2017. Minimum OC values are obtained  
468 in DS2016. Explanations for OC variations are generally similar to the ones of EC. There are  
469 less OC differences between WS2015 and WS2016 than for EC, even though WS2015 values  
470 are also lower than those of WS2016, as for EC. In terms of size distribution, maximum OC  
471 concentrations at the ADF site may be found in UF, then F, and finally C particles. The same  
472 distribution is observed for the other sources in DS2016, however, for the other campaigns, OC  
473 size distribution looks like the EC ones with higher concentrations in UF and C particles than  
474 in F particles. Note that OC concentrations are higher in the CT site compared to AT for each  
475 particulate size during DS, whereas during the WS, AT OC concentrations are slightly higher  
476 than the CT values. This can be explained by the traffic source in each city. Indeed, the



477 consumption of petrol and diesel fuel by transport in Benin exceeds that of Côte d'Ivoire, which  
478 could imply higher carbonaceous aerosol concentrations in Benin than in Abidjan in DS. In the  
479 raining season, the lack of road infrastructure associated with poor road conditions prevents  
480 motor vehicles from accessing certain districts in Cotonou. Traffic is thus assumed to be  
481 reduced, implying lower OC concentrations in CT than in AT.

482 Table 3 compares our OC and EC values to those obtained by Djossou et al. (2018) and Xu et  
483 al. (2019) for the same period and the same sites. More precisely, this comparison was done  
484 between our data, Djossou's weekly data including our 3 days of measurements and Xu's daily  
485 exposure data of population living closed to our sites. It is interesting to note that Djossou's  
486 values are in general lower than ours. Indeed, for the wet and dry seasons, our OC  
487 measurements are 4 and 1.4 times higher than Djossou's at the AT site, 2.1 and 5.7 times  
488 higher at the CT site, and 2.5 and 2.5 times higher at the ADF site, respectively. As for PM<sub>2.5</sub>,  
489 this can be explained by the different sampling times between our experiments which were  
490 performed at the peak of urban activities, while Djossou's dataset represents weekly integrated  
491 values. Indeed, Djossou includes diurnal measurements for the whole week including lower  
492 traffic activities occurring during the nighttime and the week-end period. Differences at the  
493 ADF site are largely explained by the temporal pattern of fish smoking activities which take  
494 place every day, only in the morning, as such the associated pollution is not well represented in  
495 the weekly sampling. Finally, there are less differences at the AWB site between both datasets  
496 since waste burning emissions occur night and day throughout the week. Comparisons made  
497 between our values and those of Xu's personal data show that both OC and EC are of the same  
498 order at the ADF site, whereas Xu values are higher than ours at the CT and AWB sites. This  
499 result is in agreement with what we found with PM<sub>2.5</sub> concentrations as detailed above.

500 Finally, Table 4 presents OC and EC for the PM<sub>2.5</sub> comparison between our values and other  
501 recent studies dealing with traffic sites in other regions of the world and with similar operational  
502 conditions. We find that our values are situated in the middle of the range observed in these  
503 different studies.

### 504 **3.2.1.2 OC to EC ratio**

505 In our study, suitable linear correlations between EC and OC are obtained in the ultrafine  
506 and fine modes in all campaigns, particularly during the last one ( $r^2 = 0.8, 0.8, 0.9$  and  $0.9$ ) at  
507 the ADF, AWB, CT and AT sites, respectively. This suggests that different studied sources can  
508 be assessed as significant sources of both EC and OC. As shown in Figure 10, the highest  
509 OC/EC values (e.g. 25 for F particles) are obtained for WS2016 at the ADF site, whereas the





510 lowest values are found in DS2017. This is the same at all traffic sites, with ratios lower than 2  
511 for DS2017. For the other campaigns, OC/EC are never higher than 5, with AT ratios slightly  
512 higher than CT ratios. OC/EC ratios are more variable at the AWB site with values in 1-10  
513 range. Such variations can be explained by the type of the sources characterized by different  
514 OC/EC ratios, as well as by secondary aerosol organic formation which can be detected for  
515 OC/EC higher than 2 (Turpin et al. 1990; Hildermann et al. 1991; Chow et al. 1996). Such a  
516 process is difficult to test in our study because the sites are situated very close to the source  
517 level, with the exception of the AWB site (Renjian et al. 2012). However, we find comparable  
518 results between our OC/EC ratios and the one measured at the source level by Keita et al.  
519 (2018). Indeed, mean OC/EC ratio measured for wood burning source by these authors is  
520 approximately 11.2, which is in agreement with our data at the ADF site. In addition, OC/EC  
521 ratio for the waste burning source is about 7.6, whereas our values at the AWB site are in the  
522 range 2 to 10.

523 There are no marked differences between OC/EC ratios when comparing values between the  
524 CT and AT sites. OC/EC ratios are globally on the same order for WS2015, WS2016 and  
525 DS2016, with values similar to that of gasoline emissions or old diesel vehicles. However, the  
526 ratios are lower for DS2017, with values typical of those of diesel emission (Mmari et al., 2013,  
527 Keita et al., 2018). The general strike occurring in DS2016 in Abidjan could explain such a  
528 difference. Indeed, more EC emissions occurred in DS2017 than in DS2016 for constant OC  
529 emissions. This can be the result of more diesel traffic.

530 Similar ratio values have also been previously reported for other megacities such Agra, India  
531 with 6.7 (Pachauri et al., 2013), Helsinki, Finland with 2.7 (Viidanoja, 2002), Cairo, Egypt with  
532 2.9 (Favez, 2008), Paris, France with 3.5 (Favez, 2008), and Milan, Italy with 6.6 (Lonati et al.,  
533 2007).

### 534 3.2.1.3 Water-Soluble Organic Carbon

535 Concentrations of WSOC and WSOC/OC ratios are presented in Table 5 for each size  
536 (UF, F, C and PM<sub>2.5</sub>) and campaign. As seen, WSOC are always higher at the ADF site than  
537 in other sites, at least by a factor of 12. Maximum values are obtained in WS2016 with an  
538 average of 16.47, 17.08 and 79.68  $\mu\text{g}/\text{m}^3$  for coarse, fine and ultra-fine fractions, respectively,  
539 followed by WS2015 and DS2017. WSOC concentrations are the lowest in DS2016, with an  
540 average of 4.14, 6.95 and 21.89  $\mu\text{g}/\text{m}^3$  for coarse, fine and ultrafine fractions, respectively.

541 The concentrations of WSOC at the Abidjan traffic site are higher than those recorded at the  
542 Cotonou traffic site in the wet seasons of 2015 and 2016, but lower in dry periods. Finally, the



543 AWB site values are on the same order as at the AT and CT sites. In terms of seasonality, there  
544 is not a clear trend in WSOC values at the AWB and AT sites, whereas at the CT and ADF  
545 sites, we find WSOC values to be respectively higher and lower in dry seasons compared to  
546 wet seasons.

547 It is also interesting to note that WSOC are maximum in UF sizes in the AT, ADF and AWB  
548 sites. At the CT site, the highest values are found in the coarse particulate fractions, except  
549 during DS2016. Several factors can explain such variabilities. Firstly, WSOC concentration  
550 levels are linked to meteorological factors, such as high solar radiation, which can produce  
551 intense photochemical reactions and secondary organic formation (Tang et al., 2016, Favez et  
552 al., 2008). Also, more WSOC may be linked to high relative humidity, but lower than 80% as  
553 mentioned by Liang et al. (2016). In our study, temperatures are roughly similar in both seasons,  
554 with slightly higher values in DS than in WS. This could explain the higher WSOC values  
555 obtained in DS than in WS at the CT site. However, this does not explain ADF WSOC  
556 variations with higher values in WS than in DS, which could be due to RH variability, higher  
557 in WS than in DS. This is in agreement with Favez et al. (2008) who shows that WSOC is not  
558 an adequate SOA tracer in urban environments. Secondly, WSOC concentrations can be  
559 dependent on the related sources. Values at the ADF site are much higher than at other sites.  
560 This is expected since wood burning is an incomplete source which is well known to produce  
561 more WSOC than traffic sources (Yu et al., 2018, Tang et al., 2016, Feng 2006, Saxena and  
562 Hildemann, 1996). Third, the presence of dust can produce semi-volatile organic gas  
563 scavenging, and therefore WSOC and OC enhancement. Such a phenomenon can also explain  
564 the highest WSOC concentrations observed in DS at the CT site where dust concentrations are  
565 highest (see below paragraphs). Moreover, this can also explain why WSOC concentrations are  
566 maximum in coarse particles at CT, but in ultra-fine particles at the other sites.

567 As expected, WSOC is strongly correlated with OC ( $r=0.7$  at ADF,  $0.8$  at AT,  $0.5$  at AWB and  
568  $0.7$  at CT), whereas correlations with EC are weaker at the AWB and CT sites with values  
569 ranging from  $0.1$  to  $0.4$ , respectively. The relationships between WSOC and OC and WSOC  
570 and EC suggest similar primary sources and/or similar SOA formation processes. As previously  
571 mentioned, source processes and characteristics explain ADF and AT values, underlining also  
572 the impact of dust at the CT site. This is also confirmed by the correlation between WSOC and  
573  $K^+$  at the ADF site. Finally, when looking at WSOC/OC ratios (Table 5), maximum values are  
574 obtained at the ADF site with PM<sub>2.5</sub> values as much as 43%, followed by the AT and AWB  
575 sites with 32%. The lowest value (23%) is found at the CT site. The same reasons mentioned  
576 earlier may explain differences in values between the ADF and other sites. However, the



577 difference between the AT and CT sites is difficult to explain since both the meteorological  
578 factors and the traffic sources are similar. The only difference deals with the dust impact, higher  
579 at CT than AT. It can be assumed that dust could limit WSOC formation, at high concentrations  
580 or depending on sources (road dust, desert dust...). Also, Table 5 shows that there is no clear  
581 seasonality in WSOC/OC values, excepted at ADF where maximum values occur during the  
582 WS. Note as earlier, that ratios are maximum in ultra-fine and fine fractions for all sites except  
583 at the CT site where the ratio for coarse fraction is highest.  
584 Briefly, as presented in Table 6, it is interesting to compare our WSOC concentrations to  
585 literature data for different traffic sites of the world. We note that our values are on the same  
586 order as values found in Asia, and higher than those found in Europe.

### 587 3.2.2 Water-soluble ionic species

588 Figure 11 shows the relative contribution of the major ions to the total concentration of  
589 water soluble inorganic species in the different particle modes (C, F and UF) collected at the  
590 ADF, AWB, AT and CT sites for the different measurement campaigns. The concentrations of  
591 different ions show significant variations from site to site. The dominant ionic species at the  
592 ADF site is chloride ( $\text{Cl}^-$ ), with concentrations in the range of 2.1-12.9  $\mu\text{g}\cdot\text{m}^{-3}$ , accounting for  
593 18-38% of the total ions, followed by soluble potassium ( $\text{K}^+$ ), ranging from 0.9-6.6  $\mu\text{g}\cdot\text{m}^{-3}$  (8-  
594 22%). The third most important element is ammonium ( $\text{NH}_4^+$ ), with concentrations in the range  
595 of 1.1-5.2  $\mu\text{g}\cdot\text{m}^{-3}$  (9-15%). The mass concentrations of soluble calcium ( $\text{Ca}^{2+}$ ) (1.5-3.2  $\mu\text{g}\cdot\text{m}^{-3}$ )  
596 are on the same order of magnitude as the values for  $\text{NO}_3^-$  (0.9-3.9  $\mu\text{g}\cdot\text{m}^{-3}$ ),  $\text{SO}_4^{2-}$  (1.0-3.4  $\mu\text{g}\cdot\text{m}^{-3}$ )  
597  $^3$ ), and to a lesser extent, soluble sodium ( $\text{Na}^+$ ) (0.5-2.2  $\mu\text{g}\cdot\text{m}^{-3}$ ). However,  $\text{Ca}^{2+}$  contributions,  
598 ranging from 13 to 25% of total measured ions, are higher than those of  $\text{NO}_3^-$  (7-11%),  $\text{SO}_4^{2-}$  (9-  
599 11%) and  $\text{Na}^+$  (4-7%). The concentrations of magnesium ( $\text{Mg}^{2+}$ ) are low, ranging from 0.5 to  
600 1.1  $\mu\text{g}\cdot\text{m}^{-3}$  (3.6-3.8%), and are as high as the sum of the remaining species (oxalic, formic and  
601 acetic), constituting 2.1-7.2% of the total ion mass at the ADF site. Chloride is most likely  
602 associated with sea salt origin (55% of total composition of the sea water) or secondary aerosol  
603 production (Li et al., 2016). Its highest concentration at the ADF site remains lower than the  
604 typical concentration in sea water, suggesting a secondary production source. The size  
605 distributions of  $\text{Cl}^-$ ,  $\text{K}^+$ ,  $\text{NH}_4^+$  and  $\text{SO}_4^{2-}$  (Figure 11a) support the conclusion that the  
606 predominance of these elements in ultrafine particle mode at the ADF site could be associated  
607 with anthropogenic emissions, particularly biomass combustion and domestic fires, or with  
608 secondary inorganic aerosols origin. Contrarily,  $\text{Ca}^{2+}$ ,  $\text{NO}_3^-$  contributions to the total ions at the  
609 ADF site peak mainly in the large particle fraction and may be attributed to quasi natural origin,



610 primarily to dust emissions and nitrate formation by reaction processes, respectively. In  
611 addition,  $\text{Na}^+$  and  $\text{Mg}^{2+}$  display similar size distributions at the ADF site, with the major  
612 contribution in the fine particle fraction, suggesting the common sea salt origin of these two  
613 elements (Belis et al., 2013).

614  $\text{NO}_3^-$  is the major ionic component at the AWB, AT and CT sites, representing 21-36% of the  
615 total water soluble inorganic concentration (i.e. 1.8-6.4  $\mu\text{g}\cdot\text{m}^{-3}$ ), 12-33% (1.1-5.0  $\mu\text{g}\cdot\text{m}^{-3}$ ) and  
616 12-32% (1.6-7.4  $\mu\text{g}\cdot\text{m}^{-3}$ ), respectively. The second major contributor is  $\text{Cl}^-$ , accounting for 12-  
617 28% of the ion mass (1.1-2.9  $\mu\text{g}\cdot\text{m}^{-3}$ ) at AWB, 6-30% (0.6-2.8  $\mu\text{g}\cdot\text{m}^{-3}$ ) at AT and 7-27% (1.5-  
618 4.6  $\mu\text{g}\cdot\text{m}^{-3}$ ) at CT, followed by  $\text{SO}_4^{2-}$  with percentages of 9-20% (1.0-3.5  $\mu\text{g}\cdot\text{m}^{-3}$ ) at AWB, 9-  
619 15% (0.9-2.3  $\mu\text{g}\cdot\text{m}^{-3}$ ) at AT and 11-18% (1.5-4.1  $\mu\text{g}\cdot\text{m}^{-3}$ ) at CT. The proportion of  $\text{Ca}^{2+}$  is higher  
620 at the CT site, representing 14-26% (2.4-6.0  $\mu\text{g}\cdot\text{m}^{-3}$ ) of the bulk ion mass compared to 5-21%  
621 (0.5-2.3  $\mu\text{g}\cdot\text{m}^{-3}$ ) at AWB and 7-19% (1.1-1.9  $\mu\text{g}\cdot\text{m}^{-3}$ ) at AT, supporting the hypothesis of the  
622 high influence of re-suspended road dust by wind and motor vehicles at the Cotonou site and/or  
623 long range transport of dust.  $\text{Na}^+$  concentrations measured at the AWB, AT and CT sites are  
624 slightly lower than those of  $\text{Ca}^{2+}$ , with values from 0.4 to 3.1  $\mu\text{g}\cdot\text{m}^{-3}$  (5 to 18%), while  $\text{Mg}^{2+}$   
625 contribution remains lower than 2% of the total ions at all sites. Note that organic gases  
626 contributions at AT, CT and AWB is slightly lower than at ADF with values lower than 4%.

627 In contrast to the ADF site, the proportion of  $\text{Cl}^-$  at the traffic sites (AT and CT) is most likely  
628 dominated by coarse particles, while at the AWB site no clear trend is observed (Figures 11b-  
629 d). These results suggest that  $\text{Cl}^-$  at AT and CT probably originated from sea salt emissions,  
630 while at AWB it produced from a mix of sources, including fuel combustion and mineral salt  
631 from sources around the measurement sites.  $\text{SO}_4^{2-}$  is mainly found in ultrafine mode at the AT,  
632 AWB and CT sites, with maximum relative contributions ranging from 10 to 40% of the total  
633 ions. Conversely, the maximum concentrations of  $\text{NO}_3^-$  are observed in the coarse or fine  
634 particle modes, constituting a percentage of between 10 and 50% at all sites. The importance  
635 of ultrafine sulphates at the three sites is in-line with pollution sources of human origin  
636 (Seinfeld and Pandis, 1998), probably in the form of ammonium sulphate. The seasonal  
637 variations of  $\text{Cl}^-$ ,  $\text{Na}^+$  and  $\text{Mg}^{2+}$  show that their individual contributions to total ions are  
638 generally much higher in wet season than in the dry season for coarse and fine particles  
639 combined ( $>1\mu\text{m}$ ) (Figure 11). For example, the mean relative total percentages of  $\text{Cl}^-$  at the  
640 CT site are 27 and 24% in the wet seasons of 2015 and 2016, respectively, while these  
641 percentages decrease significantly to 9 and 7% in the dry seasons of 2016 and 2017,  
642 respectively. The  $\text{Cl}^-/\text{Na}^+$  ratios in these particle sizes are 1.4 in both seasons, except at the ADF



643 site where these ratios increase slightly to 1.6 and 1.5 in wet and dry season, respectively,  
644 slightly higher than the typical sea water ratio (1-1.2) (Hara et al.,2004).  
645 In addition, strong correlation coefficients (0.97-0.99) between  $\text{Cl}^-$  and  $\text{Na}^+$  are obtained in  
646 coarse particle sizes at all sites and in both seasons. Our analysis also shows that  $\text{Cl}^-$  in coarse  
647 and fine fractions are highly correlated with  $\text{Mg}^{2+}$  (0.97 in wet season and 0.96 in dry season)  
648 combining all sites, except at ADF for which these correlation coefficients decrease to 0.68 and  
649 0.95 in the wet and dry season, respectively. As  $\text{Cl}^-$ ,  $\text{Na}^+$  and  $\text{Mg}^{2+}$  are associated with sea salt  
650 origin or secondary aerosol production (Xiao et al., 2018), these results indicate that coarse  $\text{Cl}^-$   
651 ,  $\text{Na}^+$  and  $\text{Mg}^{2+}$  particles ( $>1\mu\text{m}$ ) from this study have the same “sea salt” origin at AT, CT, and  
652 CT, which is different at the ADF site. Their abundance in the wet season could be related to  
653 the influence of the predominant wind direction mainly oriented towards the North-East (Figure  
654 5) which transports marine aerosols to these sites. Contrarily, in the ultrafine particle mode,  
655 these elements have higher percentages in the dry season than in the wet season, with correlation  
656 coefficients between  $\text{Cl}^-$  and  $\text{Na}^+$  ( $\text{Cl}^-$  and  $\text{Mg}^{2+}$ ) from 0.44 (0.62) at the ADF site to 0.62 (0.70)  
657 at the rest of the sites. This suggests secondary production of these very fine ions.  
658 As shown in Figure 11, the relative percentage of  $\text{SO}_4^{2-}$ ,  $\text{NH}_4^+$  and  $\text{NO}_3^-$  in the different particle  
659 modes is reduced in the wet season, except at the ADF site for which the proportions of  
660  $\text{SO}_4^{2-}$  and  $\text{NH}_4^+$  tend to increase during that period, especially in the ultrafine particles. During  
661 the wet season, the clean winds surrounding the ocean before reaching the measurement sites  
662 (Figure 5, top) could contribute to lower the proportion of these species, in addition to the  
663 scavenging processes during the rainy season. Unlike the wet season, a relatively good  
664 correlation of 0.87 ( $\text{SO}_4^{2-}$  versus  $\text{NH}_4^+$ ), 0.73 ( $\text{NO}_3^-$  versus  $\text{NH}_4^+$ ) and 0.87 ( $\text{SO}_4^{2-}$  versus  $\text{NO}_3^-$ )  
665 has been found in coarse particles ( $>1\mu\text{m}$ ), indicating similar sources for these three species  
666 during the dry season. In order to try to identify these sources, the ratio of  $\text{SO}_4^{2-}/\text{Ca}^{2+}$  and  
667  $\text{NO}_3^-/\text{Ca}^{2+}$  has been determined. The average  $\text{SO}_4^{2-}/\text{Ca}^{2+}$  and  $\text{NO}_3^-/\text{Ca}^{2+}$  ratios in combined  
668 coarse and fine particles at all sites except ADF (1.07 and 2.58 during the wet season and 0.33  
669 and 1.60 during the dry season) are higher than the corresponding ratios for soil (0.026 and  
670 0.003, respectively). On the other hand, the  $\text{SO}_4^{2-}/\text{Ca}^{2+}$  ratio increases in the ultrafine particles  
671 (5.07 during the wet season and 2.53 during the dry season), while that of  $\text{NO}_3^-/\text{Ca}^{2+}$  remains  
672 almost constant (2.86 during the wet season and 1.65 during the dry season). This implies that  
673 the atmosphere around the AWB, AT and CT sites is enriched by  $\text{SO}_4^{2-}$ -formed as  
674 anthropogenic secondary particles, possibly from sulfur containing sources, particularly in  
675 ultrafine particle mode, and by  $\text{NO}_3^-$  mostly coming from nitrogen containing sources in all



676 particle sizes. The higher contributions of these elements during the dry season could result  
677 from a combination of several factors: 1) an atmosphere loaded with dust favoring  
678 heterogeneous chemistry to obtain secondary aerosol and the rise of biomass burning emissions;  
679 2) the increase of photochemical activity and higher concentrations of hydroxyl radicals in the  
680 dry season, which can oxidize  $\text{SO}_2$  from biomass combustion (Arndt et al., 1997) to  $\text{SO}_4^{2-}$  (Li  
681 et al., 2014); and 3) the wind transport of anthropogenic secondary particles from the industrial  
682 zone located upstream from our sites. As previously shown, maximum values of  $\text{SO}_4^{2-}$ ,  $\text{NH}_4^+$   
683 and  $\text{NO}_3^-$  observed during the wet season the ADF site may be linked to anthropogenic  
684 emissions, and more precisely smoking activities which pollute more in the wet than dry season.

### 685 3.2.3. Elemental concentrations

686 Table 7 shows the mean values of the major metallic elements of total particulate matter  
687 at the different studied sites for the wet season 2016 and dry season 2017. Note that data of  
688 elemental concentrations are not available for the wet season 2015 or dry season 2016. In  
689 addition, only bulk metal concentrations and their corresponding relative abundances are  
690 examined. As shown in Table 7, the concentrations of metal elements span a wide range, from  
691 0.2 to 25.2  $\mu\text{g}\cdot\text{m}^{-3}$ . Among the measured elements, Al, Na and Ca are the most abundant,  
692 followed by Fe, K and Mg. The percentage of Al accounts for 13.7% of the total re-suspended  
693 particles in the dry season 2017 (3.5% in the wet season 2016) at the AWB site, 12.3% (2.4%)  
694 at the AT site, 1.8% (0.4%) at the ADF site and 5.7% (4.4%) at the CT site, while that of Na  
695 represents 12.8% (6.6%) at the AWB site, 13.4 (3.1%) at the AT site, 1.2 (0.6%) at the ADF  
696 site and 4.3 (5.8%) at the CT site. Ca contributes to 1.6% (0.8%) of the total PM mass at the  
697 AWB site, 3.6% (0.4%) at the AT site, 0.8% (1.1%) at the ADF site and 2.3% (5.4%) at the CT  
698 site. These major three elements (Al, Na and Ca) together have concentrations in the wet season  
699 2016 (dry season 2017) of 6.2 (51.5)  $\mu\text{g}\cdot\text{m}^{-3}$ , 5.4 (33.5)  $\mu\text{g}\cdot\text{m}^{-3}$ , 14.3 (33.2)  $\mu\text{g}\cdot\text{m}^{-3}$  and 7.6 (21.2)  
700  $\mu\text{g}\cdot\text{m}^{-3}$ , accounting for 11.0% (28.1), 5.9% (29.3), 15.5% (12.3) and 2.0% (3.8) of the total PM  
701 mass at the AWB, AT, CT and ADF sites, respectively. The absolute (and relative) abundances  
702 of Fe, K and Mg combined are 1.5  $\mu\text{g}\cdot\text{m}^{-3}$  (2.6%) in the wet season and 10.3  $\mu\text{g}\cdot\text{m}^{-3}$  (5.6%) in  
703 the dry season at the AWB site. These values are 1.5  $\mu\text{g}\cdot\text{m}^{-3}$  (1.7%) and 5.7  $\mu\text{g}\cdot\text{m}^{-3}$  (5.0%) at  
704 AT, 3.2  $\mu\text{g}\cdot\text{m}^{-3}$  (3.5%) and 9.3  $\mu\text{g}\cdot\text{m}^{-3}$  (3.4%) at CT and 3.9  $\mu\text{g}\cdot\text{m}^{-3}$  (1.1%) and 12.3  $\mu\text{g}\cdot\text{m}^{-3}$   
705 (2.2%) at ADF. The highest metal concentrations are generally measured during the dry season  
706 2017 at all sites, except at CT where relatively similar values are obtained for the two seasons.  
707 The seasonal variability in all the mentioned traces elements may be attributed to drier  
708 conditions during the dry season (Figure 4) in West Africa favoring dust particle re-suspensions.



709 In addition, the dry season in West Africa is marked by the Harmattan continental winds  
710 bringing dust from the Saharan desert (Figure 5). Moreover, it is interesting to note that the lack  
711 of seasonal variability at CT may be due to the much poorer road conditions found at Cotonou  
712 compared to Abidjan.

713 Most all of these elements are generally considered to have natural origins such as the earth's  
714 crustal dust and sea salt (Al-Momani, 2003). However, K can also be associated with biomass  
715 burning (De Oliveira Alves et al., 2015). As previously mentioned, the seasonal cycle of Fe, K  
716 and Mg together suggests contributions to the bulk mass which are about twice as high in the  
717 dry season than in the wet season at all measurement sites. This trend is driven by the large  
718 variability of the element K which shows percentages in the dry season 4 to 10 times higher  
719 than those in the wet season, likely due to more biomass burning activity during the winter time.  
720 The other metals (Ti, P, Zr, Zn, Cr, Mn, Pb and Ni) represent less than 0.5% and 2% in the wet  
721 and dry seasons, respectively, at all sites, with Cr, Mn, Pb and Ni exhibiting less seasonal  
722 variability compared to the rest of the metal elements. The low proportions of these non-crustal  
723 elements in the studied sites suggest a small contribution of elements primarily emitted by  
724 anthropogenic activities such as industrial processes (Viana et al., 2007; Viana et al., 2008;  
725 Minguillón et al., 2014).

726 The highest contribution of metal elements is obtained at the AWB and AT sites, reaching 35.8  
727 and 35.2% of the total PM mass in the dry season, respectively. These maximum percentages  
728 are due to the large contribution of both Al and Na crustal elements which account for about  
729 26%. The lower proportion of metal elements at the ADF site (6.5% of the bulk concentration)  
730 can be explained by the less dominant influence of re-suspended dust particles compared to  
731 domestic fire sources. At the CT site, all elemental concentrations contribute to 16.3 % of total  
732 PM for the dry season. However, during the wet season, the highest metal contribution of 19.5%  
733 is obtained at CT, followed by AWB (14%) and AT (8.2%). The value at ADF remains the  
734 lowest (3.3%). Again, the maximum percentage at the CT site is a result of the fact that most  
735 of the roads in Cotonou are unpaved, therefore particle resuspension occurs in all seasons.

736 To assess the relative contribution of crustal and non-crustal to elemental aerosol loadings,  
737 source enrichment factor (EF), as well as elemental ratios, are often used as diagnostic tools  
738 (Weckwerth, 2001; Voutsas et al., 2002). EFs are calculated using both literature data of the  
739 typical elemental composition of the upper continental crust (Mason and Moore, 1982; Taylor,  
740 1964) and measured metal composition from this study. Using Al as a reference element, the  
741 EF of an atmospheric element X is calculated using the following formula:



742

$$EF_x = \frac{\frac{[X]_{atm}}{[Al]_{atm}}}{\frac{[X]_{soil}}{[Al]_{soil}}}$$

743 Where  $[X]_{atm}$  and  $[Al]_{atm}$  are the concentrations of the chemical element X and Al in the  
744 atmosphere, respectively, and  $[X]_{soil}$  and  $[Al]_{soil}$  are the typical concentrations of the element  
745 X and Al in the earth's crust, respectively. Al is frequently used as a reference element assuming  
746 that its anthropogenic sources in the atmosphere are negligible (Gao et al., 2002; Cao et al.,  
747 2005; Xu et al., 2012). From the EF values, source contributions are estimated following the  
748 method described by Arditoglou and Samara (2005). Note that these studies only refer to ratios  
749 for a limited list of sources. Incomplete diagnostic may be expected due to the African source  
750 specificities focused on here. Also, note that the literature data are sometimes different for the  
751 same source.

752 In all sampling sites, EF values typically lower than 5 are obtained for several trace elements  
753 (Be, Sc, Ti, V, Fe, Ga, Sr, Nb, Rh, Ba, La, Ce, Pr, Nd, Sm, Eu, Gd, Tb, Dy, Ho, Er, Tm, Yb,  
754 Lu, Ta, Th, U). This suggests natural origin of these species and therefore a negligible  
755 contribution of anthropogenic emissions (Freitas et al., 2007; Gao et al., 2002). The most  
756 enriched elements ( $EF > 100$ ) are Sb, Sn, Zn, Se, Te, Cd, Pb, Bi and Mo at nearly all of the sites,  
757 indicating significant anthropogenic origin (Wang et al., 2006). These elements are mainly  
758 emitted into the atmosphere through fossil fuel combustion, traffic emission, wear of brake  
759 lining materials and industrial processes (Watson and Chow, 2001; Samara and al., 2003).

760 Different elemental ratios have been used as diagnostic tools to identify sources of atmospheric  
761 particles, including Cu/Sb, As/V, V/Ni, Zn/Pb and Zn/Cd (Weckwerth, 2001; Samara et al.,  
762 2003; Herut et al., 2001; Foltescu et al., 1996; Arditoglou and Samara, 2005. As mentioned,  
763 incomplete diagnostic is expected and the literature values can be different for the same source.

764 The mean values of selected elemental ratios in TSP from the Abidjan (ADF, AWB and AT)  
765 and Cotonou (CT) sites are presented in Table 8. The Cu/Sb ratio is proposed as a good indicator  
766 for brake lining wear (Weckwerth, 2001; Sternbeck et al., 2002) and, consequently, as a tracer  
767 for traffic sources. Weckwerth (2001) and Sternbeck et al. (2002) reported a Cu/Sb ratio close  
768 to 5 as a diagnostic criteria for brake wear particles in the ambient air. In this study, very low  
769 ratios of  $0.28 \pm 0.21$  in the wet season 2016 and  $0.56 \pm 0.21$  in the dry season 2017 are found at  
770 the ADF site. Relatively similar values are obtained at the CT site (0.57 in the wet season and  
771  $0.19 \pm 0.16$  in the dry season). These ratios are on the same order of magnitude as those typical  
772 for soil (0.3) (Watson et al. 2001). At both the AWB and AT sites, Cu/Sb ratios ranging between  
773 0.01 and 0.16 are obtained in the dry season 2017, which seems to also indicate an influence of





774 re-suspended particles at these two sites during that period. In the other three sites (ADF, AT  
775 and CT), however highly influenced by traffic, our Cu/Sb ratios do not compare with brake  
776 lining wear ratios, but rather with soil ratios only. In contrast, very high and large ranges of  
777 ratios varying from 238.7 to 3725.9 are calculated at the AWB site during the wet season 2016.  
778 Arditsoglou and Samara (2005) proposed a Cu/Sb ratio of 700 as a tracer of diesel vehicle  
779 emissions. Here high values could be also be explained by waste burning materials, values  
780 which are not known in literature to our knowledge.

781 Typically, an As/V ratio of 0.02 indicates that the emissions are from burning oil, 0.03 for  
782 cement plant, 0.1 for soil or agricultural soil, 0.3 for metal scrap incineration source and 2.3 for  
783 petrol and diesel origin (Lee et al., 2000; Watson and Chow, 2001; Samara et al., 2003). The  
784 aerosols in Abidjan have an As/V ratio ranging from 0.28 to 0.95 during the dry season 2017,  
785 implying an anthropogenic origin for As, including petrol and diesel vehicles. Only one value  
786 of 0.07, four times lower than the lower limit of the As/V ratio found in the dry season, is  
787 present in Abidjan during the wet season. This is not enough to determine a possible seasonal  
788 variation of the ratio As/V in Abidjan. However, in Cotonou, similar As/V ratios ( $0.15 \pm 0.19$  in  
789 the wet season and  $0.15 \pm 0.06$  in the dry season) are observed for both seasons, and these values  
790 remain lower than those from Abidjan. This result suggests more dust origin for As in Cotonou.  
791 This is in-line with values reported in the literature: Watson et al. (2001) and Lee et al. (2000)  
792 reported a ratio of 0.1 as tracer of soil or agricultural soil.

793 The V and Ni trace elements are frequently used as fingerprint makers for petroleum derived  
794 hydrocarbons (Laden et al., 2000). The V/Ni ratio for oil combustion has been reported to range  
795 from 2 to 5 (Foner and Ganor, 1992; Almeida et al., 2005; Arditsoglou and Samara, 2005),  
796 while that of vehicle emissions are generally lower than 2 (0.15 for diesel, 0.4 for a mixture  
797 gasoline and diesel, 0.02 for gasoline, Samara et al., 2005; Watson and Chow, 2001). In  
798 Abidjan, the average ratio of V/Ni is  $0.17 \pm 0.11$  at ADF,  $0.20 \pm 0.20$  at AWB and  $0.22 \pm 0.11$  at  
799 AT with ratios in the dry season higher than those in the wet season, except at the AT site for  
800 which the ratio is slightly larger during the wet period (Table 4). In Cotonou, the V/Ni ratio is  
801 relatively higher than in Abidjan, varying from 0.13 to 0.66, with values in the wet period 1.4  
802 times larger than during the dry season (Table 8). These results suggest that oil combustion is  
803 a minor source of Ni and V in both Abidjan and Cotonou, which is due to the absence of  
804 industrial pollution from the combustion of heavy-fuel oil. On another hand, these low Ni/V  
805 ratios seem to support the assumption of the strong influence of vehicle emission sources on all  
806 studied sites.

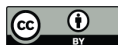

807 The ratio of Zn/Pb has been used to distinguish between transported and local aerosols. From  
808 this study, ranges of the Zn/Pb ratio (1.8-8.2 at ADF, 3.6-17.4 at AWB, 8.3-25.5 at AT and 3.5-  
809 22.5 at CT site) are representative of the ratios found for gasoline and diesel vehicles (1.7-2.4,  
810 Qin et al., 1997 ; Sakata et al., 2000 ; Watson et al., 2001 ; Chiang et al., 2012), for roadside  
811 (4.2-4.4, Zhang et al., 2018), for soil and agricultural soil (3.1-4.0, Watson et al., 2001 ; Lee et  
812 al., 2000), for earth's crust and road dust (5.4-5.5, Mason and Moore, 1982 ; Shen et al., 2016),  
813 for biomass burning and metal scrap incineration (7.2-8.4, Lee et al., 2000 ; Samara et al., 2003)  
814 and combustion of petrol oil from road transport (10.6-24.4, Pulles et al., 2012). Zn/Pb ratios  
815 calculated at both the ADF and AT sites during the dry season ( $2.8 \pm 1.3$  and  $14.8 \pm 3.8$ ,  
816 respectively) are lower than those observed during the wet season ( $7.1 \pm 3.4$  and  $19.9 \pm 14.7$ ,  
817 respectively), while at Cotonou a lower Zn/Pb ratio is found during the wet period ( $3.3 \pm 2.3$ )  
818 compared to the dry period ( $18.5 \pm 8.5$ ). This seasonal variation of the ratio Zn/Pb suggests that  
819 TSP in Abidjan is more affected by local emissions during dry season, while aerosols in  
820 Cotonou are more influenced by transported and re-suspended dust, which is in agreement with  
821 our previous conclusions. Also it is important to note that the mean values found at AT and CT  
822 (on the order of 18) are indicative of combustion of petrol from road transport origin (Pulles et  
823 al., 2012), whereas that of the ADF site (7.1) could suggest possible links to biomass burning  
824 (Samara et al., 2003).

825 Finally, the Zn/Cd ratio has been also examined. A value of 29 close to ratio reported for  
826 gasoline vehicle (27, Qin et al., 1997) is obtained for the ADF site, indicating that this site is  
827 also impacted by traffic sources. A values of 56 is obtained for the AWB site which is in close  
828 agreement with values reported for oil burning (Watson et al., 2001, Samara et al., 2003). That  
829 could indicate that oil might be one of the waste burning materials.

### 830 **3.2.4 Dust**

831 As shown in the methodology part and in the previous paragraph, we can see that desert  
832 dust and parent soils are mainly composed of clays, feldspar, and quartz, therefore contain high  
833 contents of silicon, aluminium, calcium and iron (Schütz and Rahn 1982; Laurent, 2005), the  
834 main elements from which dust concentrations are obtained. Figure 12 shows dust  
835 concentrations calculated from  $\text{Ca}^{++}$  values following the Sciare et al. (2005) relationship (see  
836 paragraph 2.3.6) for Coarse (C), Fine (F) and UltraFine (UF) particle sizes at the different sites  
837 for each season. Note that no UF value exists for the wet season 2016 due to our sampling  
838 procedure at this time.

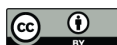

839 During the wet season, the average total concentrations range from 5.2 to 25.2  $\mu\text{g}\cdot\text{m}^{-3}$  in 2015  
840 and 13.5 to 43.0  $\mu\text{g}\cdot\text{m}^{-3}$  in 2016, with slightly higher values at the CT and ADF sites, whereas  
841 during the dry season, values range from 16.8 to 66.2  $\mu\text{g}\cdot\text{m}^{-3}$  in 2016 and from 17.6 to 61.3  
842  $\mu\text{g}\cdot\text{m}^{-3}$  in 2017, with maximum concentrations obtained at the CT site. When considering mean  
843 values of the wet and dry seasons respectively, total dust at Cotonou traffic (CT) are 2.2 and  
844 3.1 times the values found at AT, 4.4 and 2.9 times at AWB and 1.2 and 3.1 times at ADF.

845 Seasonal comparison shows that mean dust concentration are higher in the dry seasons than in  
846 WS 2015 by a factor of 1.1 for ADF, 1.8 for AT, 2.5 for CT and 4.1 for AWB. A striking feature  
847 is that wet season 2016 presents higher values by a factor of 1.6 to 2.6 than wet season 2015.  
848 Also, it is interesting to note that the dust content in coarse particles is higher in DS2017 than  
849 in DS2016. Moreover, dust is maximum for coarse particles during the wet season 2016,  
850 whereas for fine and ultrafine particles during the dry seasons and the wet season 2015. Such  
851 variations may be explained by different factors: road dust resuspension processes, long range  
852 transport of desert dust from Bodélé depression in Tchad (Prospero et al., 2002; Washington et  
853 al., 2003; Knippertz et al., 2011) and/or from northern dusty countries (Mali, Niger) (Ozer,  
854 2005) by northerly winds in dry season (Balarabe et al., 2016), and meteorological factors such  
855 as wind intensity and direction, and precipitation. It is important to note that the latter factor  
856 does not explain any trends since precipitation and wind are similar between the two wet  
857 seasons. We recall that the long-range transport of dust occurs at low elevations during the dry  
858 season, and often at higher altitudes during the rest of the year following the northward  
859 movement of the intertropical front (Afeti and Resch, 2000; Middleton et al., 2001). To go  
860 further in our analysis, AOD at 550nm from MODIS satellite images ([http://www.aeris-  
862 data.fr/redirect/MODIS-MCD64A1](http://www.aeris-<br/>861 data.fr/redirect/MODIS-MCD64A1)) associated with back trajectories (Figure 4) were  
863 examined for each date of our intensive campaigns in Abidjan and Cotonou. No clear  
864 indications were found since images do not cover our area for all periods. The interesting pattern  
865 shown in Figure 13 is the AOD difference between Cotonou and Abidjan for DS2017, with  
866 higher values at Cotonou than in Abidjan for the campaign period, likely because dust events  
867 have a larger impact in Benin than Côte d'Ivoire. This is confirmed by the DACCWA  
868 sunphotometer AOD and Angström coefficient (AE) measurements at Abidjan and Cotonou  
869 (Léon et al., 2019; Djossou et al., 2018). Indeed, in DS2017, during our period of  
870 measurements, mean AOD in Cotonou is of the order of 1.3 versus 0.9 in Abidjan for an AE of  
871 0.6 for both sites, which clearly indicates the presence of coarse dust particles. Also, when  
872 comparing DS2016 and DS2017 at Cotonou, we can see that lower AOD values (mean: 0.99)  
with higher AE values (mean: 1.1) are observed. This is in agreement with the increase of dust



873 concentrations in the coarse fraction observed between 2016 and 2017 shown in Figure 12. If  
874 we focus now on the two wet seasons, as mentioned earlier, dust concentrations are much higher  
875 in 2016 than in 2015 at the CT and ADF sites. It is consistent with observed AOD values at CT  
876 which increased by a factor of 2 between 2015 and 2016. No AOD value is given by Léon et  
877 al. (2019) at Abidjan in WS2015 to allow such comparison in Abidjan. Moreover, during the  
878 WS, an AE on the order of 1 may be found at CT, indicating smaller particles which could be  
879 due to road resuspension. It is interesting to note that during WS 2016, AOD and AE are  
880 respectively higher and lower at Abidjan than at Cotonou. Again, this is consistent with our  
881 dust concentrations at CT. In Abidjan, we could assume that another source of  $\text{Ca}^{++}$ , which is  
882 not taken into account in our dust calculations, may explain our dust concentration data. That  
883 may be the result of anthropogenic  $\text{Ca}^{++}$  emissions from residential combustion, more important  
884 in 2016 than in 2015 as shown earlier  
885 ([http://naei.beis.gov.uk/overview/pollutants?pollutant\\_id=84](http://naei.beis.gov.uk/overview/pollutants?pollutant_id=84)).

### 886 3.3 Aerosol chemical closure

887 The aerosol chemical closure obtained using the Guinot et al. (2007) method (see below)  
888 at the different sites for each season is presented in Figure 14. Results show clear intra- and  
889 inter-annual variations at all of the sites, as well as significant differences among the sites. In  
890 total, dust accounts for 25 to 60% of the bulk PM mass (depending on the measurement  
891 campaign) at both traffic sites, with no clear seasonal cycle for the year 2016, and higher  
892 contributions in Cotonou (Figures 14c and 14d). These percentages vary from 30 to 65% at the  
893 AWB site, and from 10 to 30% at the ADF site, with percentages 1.5 and 2 times higher in the  
894 dry season than in the wet season for the year 2016 (Figures 14a and 14b). This high  
895 contribution is related to the Saharan dust transport occurring during the dry season as  
896 demonstrated earlier. The largest percentage observed in Cotonou can be explained by the  
897 influence of local dust, mainly from unpaved roads (only 8% of roads are paved compared to  
898 59.4% in Abidjan (UVICOCI, 2018)). The relative contribution of dust generally peaks in the  
899 coarse mode and, to a lesser extent, in the fine mode, at all sites considered, reflecting their  
900 natural origin. However, the dust contribution in the ultrafine mode remains important. It is  
901 interesting to note that the dust contribution observed in this study for the year 2016 at the  
902 Abidjan sites is in agreement with the results of Xu et al. (2019) which show a  $\text{PM}_{2.5}$  dust  
903 contribution of 35-50% compared to our values of 18-52%.

904 Carbonaceous aerosol, the sum of EC and POM, show large contributions at the ADF site (up  
905 to 75% of the total PM mass), with relatively similar proportions in each season (Figure 14a).



906 The absence of a clear seasonal pattern is also observed at the other sites, except at AWB where  
907 carbonaceous aerosol contributes to 35% of the bulk PM mass in the wet season, and 15% in  
908 the dry season of 2016 (Figures 14b-d). However, carbonaceous aerosol contribution accounts  
909 for about 18-25% of the total mass at both traffic sites. As seen in Figure 14, in most of the  
910 cases, carbonaceous aerosol contribution sharply increases from the coarse to ultrafine mode in  
911 all sites during both seasons, with the exception of the ADF site during the wet season 2015.  
912 As shown previously, the importance of carbonaceous aerosol at the ADF site reveals, on one  
913 hand, the proximity between active sources such as domestic fires and the sampling site, and  
914 on the other hand, the specificity of the site characterized by lots of wood burning activities.  
915 These activities are responsible of high incomplete combustions with high emission factor  
916 values (Keita et al., 2018). In addition, as an indicator of incomplete source, the EC-to-POM  
917 ratio obtained for the ADF site is 3 to 4 times lower than the values calculated for the other sites  
918 (Figure 14).

919 The average total concentrations of ionic species are  $27.4 \mu\text{g.m}^{-3}$  in the wet season ( $19.0 \mu\text{g.m}^{-3}$   
920  $^3$  in the dry season),  $12.5$  ( $11.3 \mu\text{g.m}^{-3}$ ),  $13.2$  ( $7.8 \mu\text{g.m}^{-3}$ ) and  $14.8$  ( $17.3 \mu\text{g.m}^{-3}$ ) at the ADF,  
921 AWB, AT and CT sites, accounting for 5.7 (5.4%), 19.2 (6.5%), 14.7 (5.7%) and 14.4 (6.4%)  
922 of bulk PM, respectively. The percentages of the total WSI to PM mass (15-20%) at the three  
923 Abidjan sites (ADF, AWB and AT) are on the same order of magnitude than the data from  
924 PM<sub>2.5</sub> personal exposure samples collected at the same locations in 2016 by Xu et al. (2019).  
925 Our results also are very close to the ionic contribution of 9% of the PM<sub>10</sub> mass found at the  
926 urban curbside site in Dar es Salaam in Tanzania during the wet season 2005 by Mkoma (2008).  
927 Our results indicate no clear seasonal cycle. The highest WSI concentration during the wet  
928 season at both sites can be explained by the impact of marine aerosols during this season. In  
929 addition, at the ADF site, the large use of moist wood for cooking can play a role. At the CT  
930 site, and to a lesser extent at AWB site, WSI concentrations are almost constant in the two  
931 seasons, indicating that WSI originates more from anthropogenic than natural sources.

932 The ion percentages of C, F and UF PM fractions are 4.8, 6.1 and 10.4% for ADF, 13.7, 24.9  
933 and 22.8% for AWB, 11.5, 24.7 and 12.4% for AT and 12.4, 26.3, 13.0% for CT, respectively,  
934 indicating higher values in fine mode except at ADF where the contribution is largest for the  
935 UF mode (Figure 14). These results suggest that WSI at the ADF site are from direct  
936 anthropogenic emissions, while at the rest of the sites they originate from fresh marine aerosols.

937



#### 938 **4- Conclusions**

939 This paper presents the mass and the size-specified chemical composition of particulate matter  
940 (PM) during the dry and wet seasons in Abidjan and Cotonou. Measurements were performed  
941 at three sites in Abidjan, representative of domestic fire (ADF), waste burning (AWB) and  
942 traffic (AT) sources, and at one traffic site in Cotonou (CT). The total PM mass concentrations  
943 show large variabilities ( $56\text{--}676\ \mu\text{g}\cdot\text{m}^{-3}$ ) and a clear seasonality with concentrations in the dry  
944 season 1.5 to 3 times higher than those in the wet season, except at the ADF site where values  
945 in the wet period are larger. The ADF site is the most polluted site and a significant fraction of  
946 the aerosol mass is in ultrafine (UF) and fine (F) particle modes, which can have the largest  
947 impact on the respiratory tract. It is interesting to note that all these values are well above the  
948 WHO guideline of  $25\ \mu\text{g}/\text{m}^3$ , irrespective of season and size. This is a warning signal for  
949 pollution levels in African capitals if nothing is done to reduce emissions in the future. The  
950 analysis of chemical species indicates a predominance of particulate organic matter (POM) at  
951 the ADF site, especially in the UF and C fractions, while at CT, dust particles are the major  
952 constituent. The specificity of the ADF site is likely related to the presence of burning activities  
953 where women dry fish and meat using wood before selling them. In the wet season, the wood  
954 is moist and combustion is highly incomplete, producing a lot of smoke and much higher  
955 aerosol concentrations than in the dry season. The large contribution of dust to the African  
956 aerosols results from road dust resuspension processes, and the long-range transport of desert  
957 dust associated with the Bodélé depression. The largest percentage observed at Cotonou may  
958 be explained by the more predominant influence of local dust, mainly from unpaved roads (only  
959 8% of roads are paved, compared to 59.4% in Abidjan). The comparison of traffic sites reveals  
960 that concentrations at the CT site are higher than those at AT. This can be explained not only  
961 by the strong influence of dust in Cotonou, but also by the consumption of petrol and diesel  
962 fuel by transport which exceeds the one of Abidjan. The carbonaceous aerosols generally peak  
963 in the UF and F particle modes. This is likely associated with anthropogenic emissions,  
964 particularly biomass and waste combustion, domestic fires and traffic.

965 Results from the chemical closure indicate clear seasonal and inter-annual variability within the  
966 same site, as well as significant differences between the sites. In total, dust accounts for 25 to  
967 60% of the bulk PM mass at both traffic sites, with no clear seasonal cycle for the year 2016,  
968 and higher contribution at Cotonou. These percentages vary from 30 to 65% at the AWB site  
969 and from 10 to 30% at the ADF site. The relative contribution of dust generally peaks in the



970 coarse mode, and to a lesser extent, in the fine mode for all sites, reflecting their natural origin.  
971 Nevertheless, the dust contribution in the ultrafine mode remains important.  
972 Carbonaceous aerosol, the sum of EC and POM, shows large contributions at the ADF site (up  
973 to 75% of the total PM mass), with relatively similar proportions in each season. The absence  
974 of seasonality is also observed at the other sites, except at AWB where carbonaceous aerosol  
975 contributes to about 35% of the bulk PM mass in the wet season and 15% in the dry season of  
976 2016. However, based on 2016, carbonaceous aerosol accounts for about 18-25% of the total  
977 mass at both traffic sites. In most cases, the carbonaceous aerosol contribution sharply increases  
978 from coarse to ultrafine mode for all sites and seasons, except at the ADF site during the wet  
979 season 2015. This result is consistent with previous studies showing that carbonaceous aerosol  
980 generally peaks in the fine mode due to their anthropogenic origin. The importance of  
981 carbonaceous aerosol at the ADF site reveals both the proximity between the active sources  
982 such as domestic fires to the sampling site, as well as the specificity of the site characterized by  
983 intense wood burning activities, which lead to high incomplete combustions. In addition, as an  
984 indicator of incomplete source, the EC-to-POM ratio obtained at the ADF site is 3 to 4 times  
985 lower than the values calculated at the other sites.

986 The average total concentrations of ionic species are  $27.4 \mu\text{g}\cdot\text{m}^{-3}$  in the wet season  
987 ( $19.0 \mu\text{g}\cdot\text{m}^{-3}$  in the dry season),  $12.5$  ( $11.3 \mu\text{g}\cdot\text{m}^{-3}$ ),  $13.2$  ( $7.8 \mu\text{g}\cdot\text{m}^{-3}$ ) and  $14.8$  ( $17.3 \mu\text{g}\cdot\text{m}^{-3}$ ) at  
988 the ADF, AWB, AT and CT sites, accounting for 5.7 (5.4%), 19.2 (6.5%), 14.7 (5.7%) and 14.4  
989 (6.4%) of the bulk PM, respectively. At the ADF site, maximum values of  $\text{SO}_4^{2-}$ ,  $\text{NH}_4^+$  and  
990  $\text{NO}_3^-$  observed during the wet season may be linked to the impact of anthropogenic emissions  
991 and, more precisely, to smoking activities which pollute more in the wet than in the dry season.  
992 However, our results indicate no clear seasonal cycle for WSI. The higher WSI concentration  
993 during the wet season at the other sites can be explained by the impact of marine aerosols during  
994 this season.

995 The WSI percentages in C, F and UF PM fractions for the ADF, AWB, AT and CT sites,  
996 respectively, indicate a peak in the fine mode except at ADF where the contribution is largest  
997 in the UF mode. These results confirm that WSI at ADF is due to anthropogenic emissions. In  
998 terms of trace elements, they present a well-marked seasonal evolution. The highest  
999 concentrations registered during the dry season are for the Al specie, followed by Fe. The mean  
1000 values of selected trace element ratios in TSP for the Abidjan (ADF, AWB and AT) and  
1001 Cotonou (CT) sites indicate the influence of dust particles at these sites during that period. At  
1002 the ADF, AT and CT sites, As/V ratios from 0.28 to 0.95 in DS2017, indicate the anthropogenic  
1003 origin of As, especially from petrol and diesel vehicles. The seasonal variation of the Zn/Pb



1004 ratio suggests that TSP in Abidjan is more affected by local emissions during the dry season,  
1005 while Cotonou aerosols are more influenced by transported and re-suspended dust, which is in  
1006 agreement with our previous conclusions. Finally, the Zn/Cd ratio has been also examined, with  
1007 a value of 29 at the ADF site. This indicates that the ADF site is also impacted by traffic sources.  
1008 Finally, WSOC concentrations for each site, size and season have also been evaluated. It is  
1009 interesting to note that such values are maximum at the ADF site for the wet season. At this  
1010 site, the WSOC/OC and WSOC/K ratios highlight the primary origin of WSOC due domestic  
1011 fire emissions. We also note the high concentrations of WSOC at CT in the dry season which  
1012 is related to large dust concentrations and heterogeneous chemistry.

1013 Our study constitutes an original database to characterize urban air pollution from  
1014 specific African combustion sources. The next step will be to cross such an exhaustive aerosol  
1015 chemical characterization to biological data in order to evaluate the impact of aerosol size and  
1016 chemical composition on aerosol inflammatory properties.

1017

1018 **Acknowledgements.** The research leading to these results has received funding from the  
1019 European Union 7th Framework Programme (FP7/2007-2013) under Grant Agreement no.  
1020 603502 (EU project DACCIWA: Dynamics-aerosol-chemistry-cloud interactions in West  
1021 Africa). The authors greatly thank all the colleagues and operators who contribute to sampling  
1022 during the different campaigns.

1023

#### 1024 **Author Contributions**

1025 J.A. and C.L. conceived and designed the study. J.A., C.L. and T.D. contributed to the  
1026 literature search, data analysis/interpretation and manuscript writing. J.A., C.L., A.B., TD. and  
1027 contributed to manuscript revision. J.A., C.L., J.F.L, H.C, V.Y., A.A, C.G, C.Z, E.C and S.K.  
1028 carried out the particulate samples collection and chemical experiments, analyzed the  
1029 experimental data.

#### 1030 **Additional Information**

1031 Fig. S1 and Appendix A-D accompany this manuscript can be found in Supplementary  
1032 Information.

#### 1033 **Competing financial interests**

1034 The authors declare no competing financial interests

1035

#### 1036 **References**





- 1037 Adon, M., Galy-Lacaux, C., Yoboué, V., Delon, C., Lacaux, J. P., Castera, P., Gardrat, E.,  
1038 Pienaar, J., Al Ourabi, H., Laouali, D., Diop, B., Sigha-Nkamdjou, L., Akpo, A., Tathy, J.  
1039 P., Lavenu, F. and Mougín, E.: Long term measurements of sulfur dioxide, nitrogen  
1040 dioxide, ammonia, nitric acid and ozone in Africa using passive samplers, *Atmos. Chem.*  
1041 *Phys.*, 10(15), 7467–7487, doi:10.5194/acp-10-7467-2010, 2010.
- 1042 Afeti, G. M. and Resch, F. J.: Physical characteristics of Saharan dust near the Gulf of Guinea,  
1043 *Atmospheric Environment*, 34(8), 1273–1279, doi:10.1016/S1352-2310(99)00296-4,  
1044 2000.
- 1045 Alastuey, A., Querol, X., Castillo, S., Escudero, M., Avila, A., Cuevas, E., Torres, C., Romero,  
1046 P., Exposito, F. and Garcia, O.: Characterisation of TSP and PM<sub>2.5</sub> at Izaña and Sta. Cruz  
1047 de Tenerife (Canary Islands, Spain) during a Saharan Dust Episode (July 2002),  
1048 *Atmospheric Environment*, 39(26), 4715–4728, doi: 10.1016/j.atmosenv.2005.04.018,  
1049 2005.
- 1050 Almeida, S., Pio, C., Freitas, M., Reis, M. and Trancoso, M.: Source apportionment of fine and  
1051 coarse particulate matter in a sub-urban area at the Western European Coast, *Atmospheric*  
1052 *Environment*, 39(17), 3127–3138, doi: 10.1016/j.atmosenv.2005.01.048, 2005.
- 1053 Al-Momani, I.: Trace elements in atmospheric precipitation at Northern Jordan measured by  
1054 ICP-MS: acidity and possible sources, *Atmospheric Environment*, 37(32), 4507–4515, doi:  
1055 10.1016/S1352-2310(03)00562-4, 2003.
- 1056 Arditsoglou, A. and Samara, C.: Levels of total suspended particulate matter and major trace  
1057 elements in Kosovo: a source identification and apportionment study, *Chemosphere*, 59(5),  
1058 669–678, doi: 10.1016/j.chemosphere.2004.10.056, 2005.
- 1059 Arndt, R. L., Carmichael, G. R., Streets, D. G. and Bhatti, N.: Sulfur dioxide emissions and  
1060 sectorial contributions to sulfur deposition in Asia, *Atmospheric Environment*, 31(10),  
1061 1553–1572, doi: 10.1016/S1352-2310(96)00236-1, 1997.
- 1062 Avogbe, P. H., Ayi-Fanou, L., Cachon, B., Chabi, N., Debende, A., Dewaele, D., Aissi, F.,  
1063 Cazier, F. and Sanni, A.: Hematological changes among Beninese motor-bike taxi drivers  
1064 exposed to benzene by urban air pollution, *African Journal of Environmental Science and*  
1065 *Technology*, 5(7), 464–472–472, 2011.
- 1066 Balarabe, M., Abdullah, K. and Nawawi, M.: Seasonal Variations of Aerosol Optical Properties  
1067 and Identification of Different Aerosol Types Based on AERONET Data over Sub-Sahara  
1068 West-Africa, *ACS*, 06(01), 13–28, doi:10.4236/acs.2016.61002, 2016.
- 1069 Belis, C. A., Karagulian, F., Larsen, B. R. and Hopke, P. K.: Critical review and meta-analysis  
1070 of ambient particulate matter source apportionment using receptor models in Europe,  
1071 *Atmospheric Environment*, 69, 94–108, doi: 10.1016/j.atmosenv.2012.11.009, 2013.
- 1072 Besombes, J.-L., Maître, A., Patissier, O., Marchand, N., Chevron, N., Stoklov, M. and Masclet,  
1073 P.: Particulate PAHs observed in the surrounding of a municipal incinerator, *Atmospheric*  
1074 *Environment*, 35(35), 6093–6104, doi: 10.1016/S1352-2310(01)00399-5, 2001.

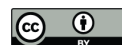

- 1075 Bisht, D.S., Dumka, U.C., Kaskaoutis, D.G., Pipal, A.S., Srivastava, A. K., Soni, V.K., Attri,  
1076 S.D., Sateesh, M., Tiwari, S.: Carbonaceous aerosols and pollutants over Delhi urban  
1077 environment: Temporal evolution, source apportionment and radiative forcing, *Science of*  
1078 *the Total Environment.*, 521-522: 431-445, 2015a.
- 1079 Bouhila, Z., Mouzai, M., Azli, T., Nedjar, A., Mazouzi, C., Zergoug, Z., Boukhadra, D.,  
1080 Chegrouche, S. and Lounici, H.: Investigation of aerosol trace element concentrations  
1081 nearby Algiers for environmental monitoring using instrumental neutron activation  
1082 analysis, *Atmospheric Research*, 166, 49–59, doi: 10.1016/j.atmosres.2015.06.013, 2015.
- 1083 Cachier, H., Brémond, M.-P. and Buat-Ménard, P.: Carbonaceous aerosols from different  
1084 tropical biomass burning sources, *Nature*, 340(6232), 371–373, doi:10.1038/340371a0,  
1085 1989.
- 1086 Cachon, B. F., Firmin, S., Verdin, A., Ayi-Fanou, L., Billet, S., Cazier, F., Martin, P. J., Aissi,  
1087 F., Courcot, D., Sanni, A. and Shirali, P.: Proinflammatory effects and oxidative stress  
1088 within human bronchial epithelial cells exposed to atmospheric particulate matter (PM<sub>2.5</sub>  
1089 and PM<sub>>2.5</sub>) collected from Cotonou, Benin, *Environmental Pollution*, 185, 340–351, doi:  
1090 10.1016/j.envpol.2013.10.026, 2014.
- 1091 Cao, J.J., Lee, S.C., Zhang, X.Y., Chow, J.C., An, Z.S., Ho, K.F., Watson, J.G., Fung, K., Wang,  
1092 Y.Q. and Shen, Z.X.: Characterization of airborne carbonate over a site near Asian dust  
1093 source regions during spring 2002 and its climatic and environmental significance, *J.*  
1094 *Geophys. Res.*, 110(D3), D03203, doi: 10.1029/2004JD005244, 2005.
- 1095 Cassee, F. R., Héroux, M.-E., Gerlofs-Nijland, M. E. and Kelly, F. J.: Particulate matter beyond  
1096 mass: recent health evidence on the role of fractions, chemical constituents and sources of  
1097 emission, *Inhalation Toxicology*, 25(14), 802–812, doi:10.3109/08958378.2013.850127,  
1098 2013.
- 1099 Celo, V., Dabek-Zlotorzynska, E., Mathieu, D., Okonskaia, I.: Validation of simple microwave-  
1100 assisted acid digestion method using microvessels for analysis of trace elements in  
1101 atmospheric PM 2.5 in monitoring and fingerprinting studies, *The Open Chemical &*  
1102 *Biomedical Methods Journal* 3., 141–150, 2010.
- 1103 Cesari, D., Donato, A., Conte, M., Merico, E., Giangreco, A., Giangreco, F. and Contini, D.:  
1104 An inter-comparison of PM<sub>2.5</sub> at urban and urban background sites: Chemical  
1105 characterization and source apportionment, *Atmospheric Research*, 174–175, 106–119,  
1106 doi: 10.1016/j.atmosres.2016.02.004, 2016.
- 1107 Cheng, Z., Jiang, J., Chen, C., Gao, J., Wang, S., Watson, J. G., Wang, H., Deng, J., Wang, B.,  
1108 Zhou, M., Chow, J. C., Pitchford, M. L. and Hao, J.: Estimation of Aerosol Mass Scattering  
1109 Efficiencies under High Mass Loading: Case Study for the Megacity of Shanghai, China,  
1110 *Environ. Sci. Technol.*, 49(2), 831–838, doi: 10.1021/es504567q, 2015.
- 1111 Chiang, H.-L., Lai, Y.-M. and Chang, S.-Y.: Pollutant constituents of exhaust emitted from  
1112 light-duty diesel vehicles, *Atmospheric Environment*, 47, 399–406, doi:  
1113 10.1016/j.atmosenv.2011.10.045, 2012.



- 1114 Chiapello, I., Bergametti, G., Chatenet, B., Bousquet, P., Dulac, F. and Soares, E. S.: Origins  
1115 of African dust transported over the northeastern tropical Atlantic, *J. Geophys. Res.*,  
1116 102(D12), 13701–13709, doi: 10.1029/97JD00259, 1997.
- 1117 Chow, J. C., Watson, J. G., Lu, Z., Lowenthal, D. H., Frazier, C. A., Solomon, P. A., Thuillier,  
1118 R. H. and Magliano, K.: Descriptive analysis of PM<sub>2.5</sub> and PM<sub>10</sub> at regionally  
1119 representative locations during SJVAQS/AUSPEX, *Atmospheric Environment*, 30(12),  
1120 2079–2112, doi:10.1016/1352-2310(95)00402-5, 1996.
- 1121 Colbeck, I., Nasir, Z. A., Ahmad, S. and Ali, Z.: Exposure to PM<sub>10</sub>, PM<sub>2.5</sub>, PM<sub>1</sub> and Carbon  
1122 Monoxide on Roads in Lahore, Pakistan, *Aerosol Air Qual. Res.*, 11(6), 689–695,  
1123 doi:10.4209/aaqr.2010.10.0087, 2011.
- 1124 Colette, A., Menut, L., Haefelin, M. and Morille, Y.: Impact of the transport of aerosols from  
1125 the free troposphere towards the boundary layer on the air quality in the Paris area,  
1126 *Atmospheric Environment*, 42(2), 390–402, doi: 10.1016/j.atmosenv.2007.09.044, 2007.
- 1127 De Oliveira Alves, N., Brito, J., Caumo, S., Arana, A., de Souza Hacon, S., Artaxo, P., Hillamo,  
1128 R., Teinilä, K., Batistuzzo de Medeiros, S. R. and de Castro Vasconcellos, P.: Biomass  
1129 burning in the Amazon region: Aerosol source apportionment and associated health risk  
1130 assessment, *Atmospheric Environment*, 120, 277–285,  
1131 doi:10.1016/j.atmosenv.2015.08.059, 2015.
- 1132 Dieme, D., Cabral-Ndior, M., Garçon, G., Verdin, A., Billet, S., Cazier, F., Courcot, D., Diouf,  
1133 A. and Shirali, P.: Relationship between physicochemical characterization and toxicity of  
1134 fine particulate matter (PM<sub>2.5</sub>) collected in Dakar city (Senegal), *Environmental Research*,  
1135 113, 1–13, doi:10.1016/j.envres.2011.11.009, 2012.
- 1136 Ding, A., Huang, X. and Fu, C.: *Air Pollution and Weather Interaction in East Asia*, Oxford  
1137 Research Encyclopedias-Environmental Science, doi:  
1138 10.1093/acrefore/9780199389414.013. 536, 2017.
- 1139 Djossou, J., Léon, J.-F., Akpo, A. B., Liousse, C., Yoboué, V., Bedou, M., Bodjrenou, M.,  
1140 Chiron, C., Galy-Lacaux, C., Gardrat, E., Abbey, M., Keita, S., Bahino, J., Touré  
1141 N&#x2013;Datchoh, E., Ossohou, M. and Awanou, C. N.: Mass concentration, optical  
1142 depth and carbon composition of particulate matter in the major southern West African  
1143 cities of Cotonou (Benin) and Abidjan (Côte d’Ivoire), *Atmos. Chem. Phys.*, 18(9), 6275–  
1144 6291, doi:10.5194/acp-18-6275-2018, 2018.
- 1145 Draxler, R. R. and Rolph, G. D.: Evaluation of the Transfer Coefficient Matrix (TCM) approach  
1146 to model the atmospheric radionuclide air concentrations from Fukushima: MODELING  
1147 RADIONUCLIDES FROM FUKUSHIMA, *J. Geophys. Res.*, 117(D5), n/a-n/a, doi:  
1148 10.1029/2011JD017205, 2012.
- 1149 Du, Z., He, K., Cheng, Y., Duan, F., Ma, Y., Liu, J., Zhang, X., Zheng, M. and Weber, R.: A  
1150 yearlong study of water-soluble organic carbon in Beijing I: Sources and its primary vs.  
1151 secondary nature, *Atmospheric Environment*, 92, 514–521,  
1152 doi:10.1016/j.atmosenv.2014.04. 060, 2014.



- 1153 Favez, O. : Caractérisation physico-chimique de la pollution particulaire dans des mégapoles  
1154 contrastées, Thèse de l'Université PARIS.DIDEROT (Paris 7), France, 2008.
- 1155 Favez, O., Sciare, J., Cachier, H., Alfaro, S. C. and Abdelwahab, M. M.: Significant formation  
1156 of water-insoluble secondary organic aerosols in semi-arid urban environment, *Geophys.*  
1157 *Res. Lett.*, 35(15), L15801, doi:10.1029/2008GL034446, 2008.
- 1158 Feng, J., Guo, Z., Chan, C. K. and Fang, M.: Properties of organic matter in PM<sub>2.5</sub> at Changdao  
1159 Island, China—A rural site in the transport path of the Asian continental outflow,  
1160 *Atmospheric Environment*, 41(9), 1924–1935, doi: 10.1016/j.atmosenv.2006.10.064,  
1161 2007.
- 1162 Feng, J., Hu, M., Chan, C. K., Lau, P. S., Fang, M., He, L. and Tang, X.: A comparative study  
1163 of the organic matter in PM<sub>2.5</sub> from three Chinese megacities in three different climatic  
1164 zones, *Atmospheric Environment*, 40(21), 3983–3994, doi:  
1165 10.1016/j.atmosenv.2006.02.017, 2006.
- 1166 Foltescu, V. L., Selin Lindgren, E., Isakson, J., Öblad, M., Tiede, R., Sommar, J., Pacyna, J. M.  
1167 and Toersth, K.: Airborne concentrations and deposition fluxes of major and trace species  
1168 at marine stations in Southern Scandinavia, *Atmospheric Environment*, 30(22), 3857–  
1169 3872, doi:10.1016/1352-2310(96)00064-7, 1996.
- 1170 Foner, H. A. and Ganor, E.: The chemical and mineralogical composition of some urban  
1171 atmospheric aerosols in Israel, *Atmospheric Environment. Part B. Urban Atmosphere*,  
1172 26(1), 125–133, doi:10.1016/0957-1272(92)90045-T, 1992.
- 1173 Freitas, M.C., Pacheco, A.M.G., Baptista, M.S., Dionísio, I., Vasconcelos, M.T.S.D. and  
1174 Cabral, J.P.: Response of exposed detached lichens to atmospheric elemental deposition,  
1175 *Proc. ECoPole.*, 1(1/2), 15-21, 2007.
- 1176 Gaga, E. O., Ari, A., Akyol, N., Üzmez, Ö. Ö., Kara, M., Chow, J. C., Watson, J. G., Özel, E.,  
1177 Döğeroğlu, T. and Odabasi, M.: Determination of real-world emission factors of trace  
1178 metals, EC, OC, BTEX, and semivolatile organic compounds (PAHs, PCBs and PCNs) in  
1179 a rural tunnel in Bilecik, Turkey, *Science of The Total Environment*, 643, 1285–1296, doi:  
1180 10.1016/j.scitotenv.2018.06.227, 2018.
- 1181 Gao, Y., Nelson, E. D., Field, M. P., Ding, Q., Li, H., Sherrell, R. M., Gigliotti, C. L., Van Ry,  
1182 D. A., Glenn, T. R. and Eisenreich, S. J.: Characterization of atmospheric trace elements  
1183 on PM<sub>2.5</sub> particulate matter over the New York–New Jersey harbor estuary, *Atmospheric*  
1184 *Environment*, 36(6), 1077–1086, doi:10.1016/S1352-2310(01)00381-8, 2002.
- 1185 Genga, A., Ielpo, P., Siciliano, T. and Siciliano, M.: Carbonaceous particles and aerosol mass  
1186 closure in PM<sub>2.5</sub> collected in a port city, *Atmospheric Research*, 183, 245–254, doi:  
1187 10.1016/j.atmosres.2016.08.022, 2017.
- 1188 Gounouge, F. : Pollution atmosphérique par les gaz d'échappement et état de santé des  
1189 conducteurs de taxi-moto (Zemidjan) de Cotonou (Bénin), Thèse de doctorat en  
1190 *Medecine*(832), 1999.



- 1191 Guieu, C.: Chemical characterization of the Saharan dust end-member: Some biogeochemical  
1192 implications for the western Mediterranean Sea, *J. Geophys. Res.*, 107(D15), 4258, doi:  
1193 10.1029/2001JD000582, 2002.
- 1194 Guinot, B., Cachier, H. and Oikonomou, K.: Geochemical perspectives from a new aerosol  
1195 chemical mass closure, *Atmos. Chem. Phys.*, 7(6), 1657–1670, doi: 10.5194/acp-7-1657-  
1196 2007, 2007.
- 1197 Guttikunda, S. K. and Calori, G.: A GIS based emissions inventory at 1 km × 1 km spatial  
1198 resolution for air pollution analysis in Delhi, India, *Atmospheric Environment*, 67, 101–  
1199 111, doi:10.1016/j.atmosenv.2012.10.040, 2013.
- 1200 Hara, K., Osada, K., Kido, M., Hayashi, M., Matsunaga, K., Iwasaka, Y., Yamanouchi, T.,  
1201 Hashida, G. and Fukatsu, T.: Chemistry of sea-salt particles and inorganic halogen species  
1202 in Antarctic regions: Compositional differences between coastal and inland stations, *J.*  
1203 *Geophys. Res.*, 109, D20208, doi:10.1029/2004JD004713, 2004.
- 1204 He, K., Yang, F., Ma, Y., Zhang, Q., Yao, X., Chan, C. K., Cadle, S., Chan, T. and Mulawa, P.:  
1205 The characteristics of PM<sub>2.5</sub> in Beijing, China, *Atmospheric Environment*, 35(29), 4959–  
1206 4970, doi: 10.1016/S1352-2310(01)00301-6, 2001.
- 1207 Herut, B., Nimmo, M., Medway, A., Chester, R. and Krom, M. D.: Dry atmospheric inputs of  
1208 trace metals at the Mediterranean coast of Israel (SE Mediterranean): sources and fluxes,  
1209 *Atmospheric Environment*, 35(4), 803–813, doi: 10.1016/S1352-2310(00)00216-8, 2001.
- 1210 Hildemann, L. M., Markowski, G. R. and Cass, G. R.: Chemical composition of emissions from  
1211 urban sources of fine organic aerosol, *Environ. Sci. Technol.*, 25(4), 744–759, doi:  
1212 10.1021/es00016a021, 1991.
- 1213 Huang, H., Ho, K. F., Lee, S. C., Tsang, P. K., Ho, S. S. H., Zou, C. W., Zou, S. C., Cao, J. J.  
1214 and Xu, H. M.: Characteristics of carbonaceous aerosol in PM<sub>2.5</sub>: Pearl Delta River  
1215 Region, China, *Atmospheric Research*, 104–105, 227–236, doi:  
1216 10.1016/j.atmosres.2011.10.016, 2012.
- 1217 Jaffrezo, J.-L., Aymoz, G., Delaval, C., and Cozic, J.: Seasonal variations of the Water Soluble  
1218 Organic Carbon mass fraction of aerosol in two valleys of the French Alps, *Atmos. Chem.*  
1219 *Phys.*, 5, 2809–2821, 2005a.
- 1220 Keita, S., Liousse, C., Yoboué, V., Dominutti, P., Guinot, B., Assamoi, E.-M., Borbon, A.,  
1221 Haslett, S. L., Bouvier, L., Colomb, A., Coe, H., Akpo, A., Adon, J., Bahino, J., Doumbia,  
1222 M., Djossou, J., Galy-Lacaux, C., Gardrat, E., Gnamien, S., Léon, J. F., Ossouhou, M.,  
1223 N&apos;Datchoh, E. T. and Roblou, L.: Particle and VOC emission factor  
1224 measurements for anthropogenic sources in West Africa, *Atmos. Chem. Phys.*, 18(10),  
1225 7691–7708, doi:10.5194/acp-18-7691-2018, 2018.
- 1226 Khan, Md. F., Shirasuna, Y., Hirano, K. and Masunaga, S.: Characterization of PM<sub>2.5</sub>, PM<sub>2.5</sub>–  
1227 10 and PM<sub>>10</sub> in ambient air, Yokohama, Japan, *Atmospheric Research*, 96(1), 159–172,  
1228 doi:10.1016/j.atmosres.2009.12.009, 2010.



- 1229 Kim, H., Liu, X., Kobayashi, T., Kohyama, T., Wen, F.-Q., Romberger, D. J., Conner, H.,  
1230 Gilmour, P. S., Donaldson, K., MacNee, W. and Rennard, S. I.: Ultrafine Carbon Black  
1231 Particles Inhibit Human Lung Fibroblast-Mediated Collagen Gel Contraction, *Am J Respir*  
1232 *Cell Mol Biol*, 28(1), 111–121, doi:10.1165/rcmb.4796, 2003.
- 1233 Knippertz, P., Tesche, M., Heinold, B., Kandler, K., Toledano, C. and Esselborn, M.: Dust  
1234 mobilization and aerosol transport from West Africa to Cape Verde—a meteorological  
1235 overview of SAMUM–2, *Tellus B: Chemical and Physical Meteorology*, 63(4), 430–447,  
1236 doi:10.1111/j.1600-0889.2011.00544.x, 2011.
- 1237 Kouassi, K. S., Billet, S., Garçon, G., Verdin, A., Diouf, A., Cazier, F., Djaman, J., Courcot,  
1238 D. and Shirali, P.: Oxidative damage induced in A549 cells by physically and chemically  
1239 characterized air particulate matter (PM 2.5) collected in Abidjan, Côte d’Ivoire, *J. Appl.*  
1240 *Toxicol.*, n/a-n/a, doi:10.1002/jat.1496, 2009.
- 1241 Laden, F., Neas, L. M., Dockery, D. W. and Schwartz, J.: Association of fine particulate matter  
1242 from different sources with daily mortality in six U.S. cities. *Environmental Health*  
1243 *Perspectives*, 108(10), 941–947, doi:10.1289/ehp.00108941, 2000.
- 1244 Lamaison, L. : Caractérisation des particules atmosphériques et identification de leurs sources  
1245 dans une atmosphère urbaine sous influence industrielle, Thèse Doctorat, Univ des  
1246 Sciences et Technologies, Lille, 2006.
- 1247 Laurent, B. : Simulation des émissions d’aérosols désertiques à l’échelle continentale : Analyse  
1248 climatologique des émissions du nord-est de l’Asie et du nord de l’Afrique, Thèse de  
1249 Doctorat, Université Paris 12, 2005.
- 1250 Lee, S. W., Pomalis, R. and Kan, B.: A new methodology for source characterization of oil  
1251 combustion particulate matter, *Fuel Processing Technology*, 65–66, 189–202,  
1252 doi:10.1016/S0378-3820(99)00086-7, 2000.
- 1253 Léon, J.F., Akpo, A., Bedou, M., Djossou, J., Bodjrenou, M., Yoboué, V., et Liousse, C. :  
1254 Profondeur optique des aérosols sur le sud de l’Afrique de l’Ouest, soumis à ACPD, 2019.
- 1255 Li, T.-C., Yuan, C.-S., Hung, C.-H., Lin, H.-Y., Huang, H.-C. and Lee, C.-L.: Chemical  
1256 Characteristics of Marine Fine Aerosols over Sea and at Offshore Islands during Three  
1257 Cruise Sampling Campaigns in the Taiwan Strait & Sea Salts and  
1258 Anthropogenic Particles, *Atmos. Chem. Phys. Discuss.*, 1–27, doi:10.5194/acp-2016-384,  
1259 2016.
- 1260 Li, Y., Schwandner, F. M., Sewell, H. J., Zivkovich, A., Tigges, M., Raja, S., Holcomb, S.,  
1261 Molenaar, J. V., Sherman, L., Archuleta, C., Lee, T. and Collett, J. L.: Observations of  
1262 ammonia, nitric acid, and fine particles in a rural gas production region, *Atmospheric*  
1263 *Environment*, 83, 80–89, doi:10.1016/j.atmosenv.2013.10.007, 2014.
- 1264 Liang, L., Engling, G., Du, Z., Cheng, Y., Duan, F., Liu, X. and He, K.: Seasonal variations  
1265 and source estimation of saccharides in atmospheric particulate matter in Beijing, China,  
1266 *Chemosphere*, 150, 365–377, 2016.



- 1267 Lioussé, C., Assamoi, E., Criqui, P., Granier, C., Rosset, R.: Explosive growth in African  
1268 combustion emissions from 2005 to 2030, *Environ. Res. Lett.*, 9, 035003, 2014.
- 1269 Lonati, G., Ozgen, S. and Giugliano, M.: Primary and secondary carbonaceous species in  
1270 PM<sub>2.5</sub> samples in Milan (Italy), *Atmospheric Environment*, 41(22), 4599–4610,  
1271 doi:10.1016/j.atmosenv.2007.03.046, 2007.
- 1272 Lowenthal, D., Zielinska, B., Samburova, V., Collins, D., Taylor, N. and Kumar, N.: Evaluation  
1273 of assumptions for estimating chemical light extinction at U.S. national parks, *Journal of*  
1274 *the Air & Waste Management Association*, 65(3), 249–260,  
1275 doi:10.1080/10962247.2014.986307, 2015.
- 1276 Marinoni, A., Laj, P., Deveaux, P., Marino, F., Ghermandi, G., Aulagnier, F., and Cachier, H.:  
1277 Physicochemical properties of fine aerosols at Pland'Aups during ESCOMPTE,  
1278 *Atmos.Res.*, 74, 565–580, 2005.
- 1279 Mason, B., Moore, B.C.: *Principles of Geochemistry*, fourth ed. John Wiley and Sons, New  
1280 York, pp. 46–47, 1982
- 1281 Middleton, N. J., Betzer, P. R. and Bull, P. A.: Long-range transport of 'giant' aeolian quartz  
1282 grains: linkage with discrete sedimentary sources and implications for protective particle  
1283 transfer, *Marine Geology*, 177(3–4), 411–417, doi: 10.1016/S0025-3227(01)00171-2,  
1284 2001.
- 1285 Minguillón, M. C., Cirach, M., Hoek, G., Brunekreef, B., Tsai, M., de Hoogh, K., Jedynska, A.,  
1286 Kooter, I. M., Nieuwenhuijsen, M. and Querol, X.: Spatial variability of trace elements and  
1287 sources for improved exposure assessment in Barcelona, *Atmospheric Environment*, 89,  
1288 268–281, doi: 10.1016/j.atmosenv.2014.02.047, 2014.
- 1289 Mkoma, S. L.: Physico-Chemical characterisation of atmospheric aerosols in Tanzania, with  
1290 emphasis on the carbonaceous aerosol components and on chemical mass closure, PhD,  
1291 Ghent University, Ghent, Belgium, 2008.
- 1292 Mmari, A. G., Potgieter-Vermaak, S. S., Bencs, L., McCrindle, R. I. and Van Grieken, R.:  
1293 Elemental and ionic components of atmospheric aerosols and associated gaseous pollutants  
1294 in and near Dar es Salaam, Tanzania, *Atmospheric Environment*, 77, 51–61, doi:  
1295 10.1016/j.atmosenv.2013.04.061, 2013.
- 1296 MMEH (Ministère des Mines de l'Energie et d'Hydraulique). : *Tableau de bord de l'Energie*  
1297 *2002 au Bénin*, Direction Générale de l'Energie, 2002.
- 1298 Ngo, N. S., Asseko, S. V. J., Ebanega, M. O., Allo'o Allo'o, S. M. and Hystad, P.: The  
1299 relationship among PM<sub>2.5</sub>, traffic emissions, and socioeconomic status: Evidence from  
1300 Gabon using low-cost, portable air quality monitors, *Transportation Research Part D:*  
1301 *Transport and Environment*, 68, 2–9, doi: 10.1016/j.trd.2018.01.029, 2019.
- 1302 Ozer, P. : Estimation de la pollution particulaire naturelle de l'air en 2003 à Niamey (Niger) à  
1303 partir de données de visibilité horizontale., 2005.



- 1304 Pachauri, T., Singla, V., Satsangi, A., Lakhani, A. and Kumari, K. M.: Characterization of  
1305 carbonaceous aerosols with special reference to episodic events at Agra, India,  
1306 Atmospheric Research, 128, 98–110, doi: 10.1016/j.atmosres.2013.03.010, 2013.
- 1307 Park, J. H., Mudunkotuwa, I. A., Mines, L. W. D., Anthony, T. R., Grassian, V. H. and Peters,  
1308 T. M.: A Granular Bed for Use in a Nanoparticle Respiratory Deposition Sampler, Aerosol  
1309 Science and Technology, 49(3), 179–187, doi:10.1080/02786826.2015.1013521, 2015.
- 1310 Person, A & Tymen, G. : Mesurage des particules en suspension dans l'air en relation avec la  
1311 santé. Pollution atmosphérique, 271-285, 2005.
- 1312 Pettijohn, F.J.: Sedimentary Rocks. 2nd Edition, Harper and Row Publishers, New York, 628  
1313 p., 1975.
- 1314 Pipal, A. S., Jan, R., Satsangi, P. G., Tiwari, S. and Taneja, A.: Study of Surface Morphology,  
1315 Elemental Composition and Origin of Atmospheric Aerosols (PM<sub>2.5</sub> and PM<sub>10</sub>) over  
1316 Agra, India, Aerosol Air Qual. Res., 14(6), 1685–1700, doi:10.4209/aaqr.2014.01.0017,  
1317 2014.
- 1318 Pipal, A. S., Singh, S. and Satsangi, G. P.: Study on bulk to single particle analysis of  
1319 atmospheric aerosols at urban region, Urban Climate, 27, 243–258, doi:  
1320 10.1016/j.uclim.2018.12.008, 2019.
- 1321 Prospero, J.M., Ginoux, P., Torres, O., Nicholson, S.E., Gill, T.E.: Environmental  
1322 characterization of global sources of atmospheric soil dust identified with the NIMBUS 7  
1323 Total Ozone Mapping Spectrometer (TOMS) absorbing aerosol product, Rev Geophys, 40,  
1324 2-1-31, 2002.
- 1325 Pulles, T., Denier van der Gon, H., Appelman, W. and Verheul, M.: Emission factors for heavy  
1326 metals from diesel and petrol used in European vehicles, Atmospheric Environment, 61,  
1327 641–651, doi: 10.1016/j.atmosenv.2012.07.022, 2012.
- 1328 Qin, Y., Chan, C. K. and Chan, L. Y.: Characteristics of chemical compositions of atmospheric  
1329 aerosols in Hong Kong: spatial and seasonal distributions, Science of The Total  
1330 Environment, 206(1), 25–37, doi: 10.1016/S0048-9697(97)00214-3, 1997.
- 1331 Rengarajan, R., Sudheer, A. K. and Sarin, M. M.: Aerosol acidity and secondary organic aerosol  
1332 formation during wintertime over urban environment in western India, Atmospheric  
1333 Environment, 45(11), 1940–1945, doi: 10.1016/j.atmosenv.2011.01.026, 2011.
- 1334 Renjian, Z., Jun, T., Ho, K.F., Zhenxing, S., Gehui, W., Junji, C., Suixin, L., Leiming, Z., Lee,  
1335 S.C.: Characterization of atmospheric organic and elemental carbon of PM<sub>25</sub> in a typical  
1336 semi-arid area of Northeastern China, Aerosol Air Qual Res., 12, 792–802, 2012.
- 1337 Sakata, M., Kurata, M. and Tanaka, N.: Estimating contribution from municipal solid waste  
1338 incineration to trace metal concentrations in Japanese urban atmosphere using lead as a  
1339 marker element. Geochem. J., 34(1), 23–32, doi:10.2343/geochemj.34.23, 2000.





- 1340 Samara, C., Kouimtzis, T., Tsitouridou, R., Kaniyas, G. and Simeonov, V.: Chemical mass  
1341 balance source apportionment of PM<sub>10</sub> in an industrialized urban area of Northern Greece,  
1342 *Atmospheric Environment*, 37(1), 41–54, doi:10.1016/S1352-2310(02)00772-0, 2003.
- 1343 Satsangi, A., Pachauri, T., Singla, V., Lakhani, A. and Kumari, K. M.: Organic and elemental  
1344 carbon aerosols at a suburban site, *Atmospheric Research*, 113, 13–21, doi:  
1345 10.1016/j.atmosres.2012.04.012, 2012.
- 1346 Saxena, P., and Hildemann, L.M.: Water-soluble organics in atmospheric particles: a critical  
1347 review of the literature and application of thermodynamics to identify candidate  
1348 compounds, *J. Atmos. Chem.*, 24(1), 57–109, 1996.
- 1349 Schütz, L. and Rahn, K. A.: Trace-element concentrations in erodible soils, *Atmospheric*  
1350 *Environment* (1967), 16(1), 171–176, doi: 10.1016/0004-6981(82)90324-9, 1982.
- 1351 Sciare, J., Oikonomou, K., Cachier, H., Mihalopoulos, N., Andreae, M. O., Maenhaut, W. and  
1352 Sarda-Estève, R.: Aerosol mass closure and reconstruction of the light scattering  
1353 coefficient over the Eastern Mediterranean Sea during the MINOS campaign, *Atmos.*  
1354 *Chem. Phys.*, 5(8), 2253–2265, doi:10.5194/acp-5-2253-2005, 2005.
- 1355 Seinfeld, J. H. et Pandis, S. N.: *Atmospheric Chemistry and Physics: from Air Pollution to*  
1356 *Climate Change*, John Wiley and Sons, Inc. New York, 1998.
- 1357 Sempéré, R. and Kawamura, K.: Comparative distributions of dicarboxylic acids and related  
1358 polar compounds in snow, rain and aerosols from urban atmosphere, *Atmospheric*  
1359 *Environment*, 28(3), 449–459, doi:10.1016/1352-2310(94)90123-6, 1994.
- 1360 Shahsavani, A., Naddafi, K., Jaafarzadeh Haghighifard, N., Mesdaghinia, A., Yunesian, M.,  
1361 Nabizadeh, R., Arhami, M., Yarahmadi, M., Sowlat, M. H., Ghani, M., Jonidi Jafari, A.,  
1362 Alimohamadi, M., Motevalian, S. A. and Soleimani, Z.: Characterization of ionic  
1363 composition of TSP and PM<sub>10</sub> during the Middle Eastern Dust (MED) storms in Ahvaz,  
1364 Iran, *Environ Monit Assess*, 184(11), 6683–6692, doi:10.1007/s10661-011-2451-6, 2012.
- 1365 Shen, Z., Cao, J., Zhang, L., Zhang, Q., Huang, R.-J., Liu, S., Zhao, Z., Zhu, C., Lei, Y., Xu,  
1366 H. and Zheng, C.: Retrieving historical ambient PM<sub>2.5</sub> concentrations using existing  
1367 visibility measurements in Xi'an, Northwest China, *Atmospheric Environment*, 126, 15–  
1368 20, doi: 10.1016/j.atmosenv.2015.11.040, 2016.
- 1369 Sternbeck, J., Sjödin, Å. and Andréasson, K.: Metal emissions from road traffic and the  
1370 influence of resuspension—results from two tunnel studies, *Atmospheric Environment*,  
1371 36(30), 4735–4744, doi: 10.1016/S1352-2310(02)00561-7, 2002.
- 1372 Stone, R. S., Herber, A., Vitale, V., Mazzola, M., Lupi, A., Schnell, R. C., Dutton, E. G., Liu,  
1373 P. S. K., Li, S.-M., Dethloff, K., Lampert, A., Ritter, C., Stock, M., Neuber, R. and  
1374 Maturilli, M.: A three-dimensional characterization of Arctic aerosols from airborne Sun  
1375 photometer observations: PAM-ARCMIP, April 2009, *J. Geophys. Res.*, 115(D13),  
1376 D13203, doi: 10.1029/2009JD013605, 2010.



- 1377 Sullivan, A. P., Weber, R. J., Clements, A. L., Turner, J. R., Bae, M. S. and Schauer, J. J.: A  
1378 method for on-line measurement of water-soluble organic carbon in ambient aerosol  
1379 particles: Results from an urban site: ON-LINE MEASUREMENT OF WSOC IN  
1380 AEROSOLS, *Geophys. Res. Lett.*, 31(13), n/a-n/a, doi: 10.1029/2004GL019681, 2004.
- 1381 Sun, Y., Zhuang, G., Wang, Y., Han, L., Guo, J., Dan, M., Zhang, W., Wang, Z. and Hao, Z.:  
1382 The air-borne particulate pollution in Beijing—concentration, composition, distribution  
1383 and sources, *Atmospheric Environment*, 38(35), 5991–6004, doi:  
1384 10.1016/j.atmosenv.2004.07.009, 2004.
- 1385 Tang, X., Zhang, X., Ci, Z., Guo, J. and Wang, J.: Speciation of the major inorganic salts in  
1386 atmospheric aerosols of Beijing, China: Measurements and comparison with model,  
1387 *Atmospheric Environment*, 133, 123–134, doi: 10.1016/j.atmosenv.2016.03.013, 2016.
- 1388 Tapsoba, D. : Caractérisation événementielle des régimes pluviométriques ouest-africains et de  
1389 leur récent changement, Thèse de Doctorat, Univ.Paris-XI (Orsay). 100p, 1997.
- 1390 Taylor, S. R.: Abundance of chemical elements in the continental crust: a new table,  
1391 *Geochimica et Cosmochimica Acta*, 28(8), 1273–1285, doi: 10.1016/0016-  
1392 7037(64)90129-2, 1964.
- 1393 Terzi, E., Argyropoulos, G., Bougatioti, A., Mihalopoulos, N., Nikolaou, K. and Samara, C.:  
1394 Chemical composition and mass closure of ambient PM10 at urban sites, *Atmospheric  
1395 Environment*, 44(18), 2231–2239, doi: 10.1016/j.atmosenv.2010.02.019, 2010.
- 1396 Tunno, B., Longley, I., Somervell, E., Edwards, S., Olivares, G., Gray, S., Cambal, L., Chubb,  
1397 L., Roper, C., Coulson, G. and Clougherty, J. E.: Separating spatial patterns in pollution  
1398 attributable to woodsmoke and other sources, during daytime and nighttime hours, in  
1399 Christchurch, New Zealand, *Environmental Research*, 171, 228–238, doi:  
1400 10.1016/j.envres.2019.01.033, 2019.
- 1401 Turpin, B. J., Cary, R. A. and Huntzicker, J. J.: An In Situ, Time-Resolved Analyzer for Aerosol  
1402 Organic and Elemental Carbon, *Aerosol Science and Technology*, 12(1), 161–171,  
1403 doi:10.1080/02786829008959336, 1990.
- 1404 Union des villes et communes de Côte d'Ivoire (UVICOCI). : Revue de presse, Available at :  
1405 <http://uvicoci.ci/accueil/infopresse/1> (last access: 20 April 2019), 2018.
- 1406 Val, S., Liousse, C., Doumbia, E. H. T., Galy-Lacaux, C., Cachier, H., Marchand, N., Badel,  
1407 A., Gardrat, E., Sylvestre, A. and Baeza-Squiban, A.: Physico-chemical characterization  
1408 of African urban aerosols (Bamako in Mali and Dakar in Senegal) and their toxic effects  
1409 in human bronchial epithelial cells: description of a worrying situation, *Part Fibre Toxicol*,  
1410 10(1), 10, doi:10.1186/1743-8977-10-10, 2013.
- 1411 Viana, M., López, J. M., Querol, X., Alastuey, A., García-Gacio, D., Blanco-Heras, G., López-  
1412 Mahía, P., Piñero-Iglesias, M., Sanz, M. J., Sanz, F., Chi, X. and Maenhaut, W.: Tracers  
1413 and impact of open burning of rice straw residues on PM in Eastern Spain, *Atmospheric  
1414 Environment*, 42(8), 1941–1957, doi: 10.1016/j.atmosenv.2007.11.012, 2008.

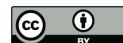

- 1415 Viana, M., Maenhaut, W., ten Brink, H. M., Chi, X., Weijers, E., Querol, X., Alastuey, A.,  
1416 Mikuška, P. and Večeřa, Z.: Comparative analysis of organic and elemental carbon  
1417 concentrations in carbonaceous aerosols in three European cities, *Atmospheric*  
1418 *Environment*, 41(28), 5972–5983, doi: 10.1016/j.atmosenv.2007.03.035, 2007.
- 1419 Viidanoja, J., Sillanpää, M., Laakia, J., Kerminen, V.-M., Hillamo, R., Aarnio, P. and  
1420 Koskentalo, T.: Organic and black carbon in PM<sub>2.5</sub> and PM<sub>10</sub>: 1 year of data from an  
1421 urban site in Helsinki, Finland, *Atmospheric Environment*, 36(19), 3183–3193, doi:  
1422 10.1016/S1352-2310(02)00205-4, 2002.
- 1423 Voutsas, D., Samara, C., Kouimtzis, T. and Ochsenkühn, K.: Elemental composition of airborne  
1424 particulate matter in the multi-impacted urban area of Thessaloniki, Greece, *Atmospheric*  
1425 *Environment*, 36(28), 4453–4462, doi: 10.1016/S1352-2310(02)00411-9, 2002.
- 1426 Wang, X., Bi, X., Sheng, G. and Fu, J.: Chemical Composition and Sources of PM<sub>10</sub> and PM<sub>2.5</sub>  
1427 Aerosols in Guangzhou, China, *Environ Monit Assess*, 119(1–3), 425–439, doi:  
1428 10.1007/s10661-005-9034-3, 2006.
- 1429 Washington, R., Todd, M., Middleton, N. J. and Goudie, A. S.: Dust-Storm Source Areas  
1430 Determined by the Total Ozone Monitoring Spectrometer and Surface Observations,  
1431 *Annals of the Association of American Geographers*, 93(2), 297–313, doi:10.1111/1467-  
1432 8306.9302003, 2003.
- 1433 Watson, J. G. and Chow, J. C.: Estimating middle-, neighborhood-, and urban-scale  
1434 contributions to elemental carbon in Mexico City with a rapid response aethalometer, *J Air*  
1435 *Waste Manag Assoc*, 51(11), 1522–1528, 2001.
- 1436 Watson, J. G., Chow, J. C. and Houck, J. E.: PM<sub>2.5</sub> chemical source profiles for vehicle  
1437 exhaust, vegetative burning, geological material, and coal burning in Northwestern  
1438 Colorado during 1995, *Chemosphere*, 43(8), 1141–1151, doi:10.1016/S0045-  
1439 6535(00)00171-5, 2001.
- 1440 Weckwerth, G.: Verification of traffic emitted aerosol components in the ambient air of  
1441 Cologne (Germany), *Atmospheric Environment*, 35(32), 5525–5536, doi: 10.1016/S1352-  
1442 2310(01)00234-5, 2001.
- 1443 WHO (World Health Organization), 7 million premature deaths annually linked to air pollution.  
1444 Media Centre news release. Geneva: World Health Organization. (<http://www.who.int/mediacentre/news/releases/2014/airpollution/en/> (accessed 30 October 2014, accessed 2  
1445 April 2015), 2014.
- 1447 Wilson, M. R., Lightbody, J. H., Donaldson, K., Sales, J. and Stone, V.: Interactions between  
1448 ultrafine particles and transition metals in vivo and in vitro, *Toxicol. Appl. Pharmacol.*,  
1449 184(3), 172–179, 2002.
- 1450 Xiang, P., Zhou, X., Duan, J., Tan, J., He, K., Yuan, C., Ma, Y. and Zhang, Y.: Chemical  
1451 characteristics of water-soluble organic compounds (WSOC) in PM<sub>2.5</sub> in Beijing, China:  
1452 2011–2012, *Atmospheric Research*, 183, 104–112, doi: 10.1016/j.atmosres.2016.08.020,  
1453 2017.



- 1454 Xiao, H.-Y., Shen, C.-Y., Zhang, Z.-Y. and Long, A.-M.: Chemical Composition and Sources  
1455 of Marine Aerosol over the Western North Pacific Ocean in Winter, *Atmosphere*, 9(8),  
1456 298, doi:10.3390/atmos9080298, 2018.
- 1457 Xie, Y., Wang, Y., Bilal, M. and Dong, W.: Mapping daily PM<sub>2.5</sub> at 500 m resolution over  
1458 Beijing with improved hazy day performance, *Science of The Total Environment*, 659,  
1459 410–418, doi: 10.1016/j.scitotenv.2018.12.365, 2019.
- 1460 Xiu, G., Wu, X., Wang, L., Chen, Y., Yu, Y., Xu, F. and Wu, L.: Characterization of Particulate  
1461 Matter, Ions and OC/EC in a Museum in Shanghai, China, *Aerosol Air Qual. Res.*, 15(4),  
1462 1240–1250, doi:10.4209/aaqr.2014.07.0147, 2015.
- 1463 Xu, H., Léon, J.-F., Liousse, C., Guinot, B., Yoboué, V., Akpo, A. B., Adon, J., Ho, K. F., Ho,  
1464 S. S. H., Li, L., Gardrat, E., Shen, Z. and Cao, J.: Personal exposure to PM<sub>2.5</sub> emitted from typical anthropogenic sources in Southern West  
1465 Africa (SWA): Chemical characteristics and associated health risks, *Atmos. Chem. Phys.*  
1466 *Discuss.*, 1–68, doi:10.5194/acp-2018-1060, 2019.
- 1468 Xu, J., Zhang, Y., Zheng, S. and He, Y.: Aerosol effects on ozone concentrations in Beijing: a  
1469 model sensitivity study, *J Environ Sci (China)*, 24(4), 645–656, 2012.
- 1470 Yu, P., Froyd, K. D., Portmann, R. W., Toon, O. B., Freitas, S. R., Bardeen, C. G., Katich, J.  
1471 M., Schwarz, J. P., Williamson, C., Kupc, A., Brock, C., Liu, S., Gao, R.-S., Schill, G.,  
1472 Fan, T., Rosenlof, K. H., and Murphy, D. M.: An improved treatment of aerosol convective  
1473 transport and removal in a chemistry-climate model, *Geophys. Res. Lett.*, submitted, 2018.
- 1474 Zghaid, M., Noack, Y., Bounakla, M., and Benyaich, F.: Pollution atmosphérique particulaire  
1475 dans la ville de Kenitra (Maroc), available at: [http://odel.irevues.inist.fr/pollution-](http://odel.irevues.inist.fr/pollution-atmospherique/index.php?id=1184&format=print)  
1476 [atmospherique/index.php?id=1184&format=print](http://odel.irevues.inist.fr/pollution-atmospherique/index.php?id=1184&format=print) (last access: 24 May 2017), 2009.
- 1477 Zhang, X. Y., Gong, S. L., Shen, Z. X., Mei, F. M., Xi, X. X., Liu, L.C., Zhou, Z. J., Wang, D.,  
1478 Wang, Y. Q., and Cheng, Y.: Characterization of soil dust aerosol in China and its transport  
1479 and distribution during 2001 ACE-Asia: 1. Network observations, *J. Geophys. Res.-*  
1480 *Atmos.*, 108(D9), 4261, doi:10.1029/2002JD002632, 2003.
- 1481 Zhang, X.-X., Sharratt, B., Liu, L.-Y., Wang, Z.-F., Pan, X.-L., Lei, J.-Q., Wu, S.-X., Huang,  
1482 S.-Y., Guo, Y.-H., Li, J., Tang, X., Yang, T., Tian, Y., Chen, X.-S., Hao, J.-Q., Zheng, H.-  
1483 T., Yang, Y.-Y. and Lyu, Y.-L.: East Asian dust storm in May 2017: observations,  
1484 modelling, and its influence on the Asia-Pacific region, *Atmos. Chem. Phys.*, 18(11),  
1485 8353–8371, doi:10.5194/acp-18-8353-2018, 2018.
- 1486
- 1487
- 1488
- 1489
- 1490



1491

1492

1493

1494

1495 **Figure caption**

1496 Figure 1: Map of the city of Abidjan reporting the geographical location of DACCIWA urban  
1497 sampling sites.

1498 Figure 2: Map of the city of Cotonou reporting the geographical location of DACCIWA urban  
1499 sampling site.

1500 Figure 3: Pictures of the different sampling sites : (a) Traffic in Cotonou (Benin, CT station),  
1501 (b) Waste burning in Abidjan (Côte d'Ivoire, AWB station), (c), Domestic fire, showing  
1502 smoking activity in Yopougon, Abidjan (Côte d'Ivoire, ADF station), (d) " woro-woro  
1503 and Gbaka " traffic in Abidjan (Côte d'Ivoire, AT station).

1504 Figure 4: Wind, pressure and temperature diagram at Abidjan and Cotonou during the different  
1505 campaigns.

1506 Figure 5: Back trajectories arriving at Abidjan (a) and Cotonou (b) for each season (WS2015,  
1507 WS2016, DS2016 and DS2017).

1508 Figure 6: Aerosol Mass concentrations at the different study sites for each campaign and for the  
1509 different sizes (C in black, Fine in light Grey, Ultra-fine in grey). Bulk aerosol mass is  
1510 indicated in boxes.

1511 Figure 7: Comparison of PM 2.5 mass concentrations in  $\mu\text{g}/\text{m}^3$  at the four sites with those  
1512 obtained by Djossou et al. (2018) and Xu et al. (2019) for the same site and period.

1513 Figure 8: EC relative concentrations in each size classes (C in black, Fine in light grey, Ultra-  
1514 fine in grey) at the different study sites for each campaign. Bulk EC concentration for  
1515 each site is indicated in boxes.

1516 Figure 9: OC relative concentrations in each size classes (C in black, Fine in light grey, Ultra-  
1517 fine in grey) at the different study sites for each campaign. Bulk OC concentration for  
1518 each site is indicated in boxes.

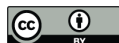

1519 Figure 10: OC/ EC ratio for the different campaigns and sites for each aerosol size (C in black,  
1520 Fine in light grey, Ultra-fine in grey). Each box shows the median and the first and the  
1521 third quartiles.

1522 Figure 11: Water-soluble ionic species speciation for each site, each campaign and each aerosol  
1523 size.

1524 Figure 12: Dust concentrations at the different study sites for each campaign and for the  
1525 different sizes (C in black, Fine in light grey, Ultra-fine in grey).

1526 Figure 13: MODIS Aerosol optical depth regional distribution over West Africa. Data are for  
1527 2017, focusing on our campaign date at Abidjan (a-c 01/11-12-left part) and Cotonou  
1528 (b-d 01/6-7, right part).

1529 Figure 14: Size-specified aerosol chemical composition for each site, for each campaign and  
1530 each aerosol size.

1531

1532

1533

1534

1535

1536

1537

1538

1539

1540

1541

1542



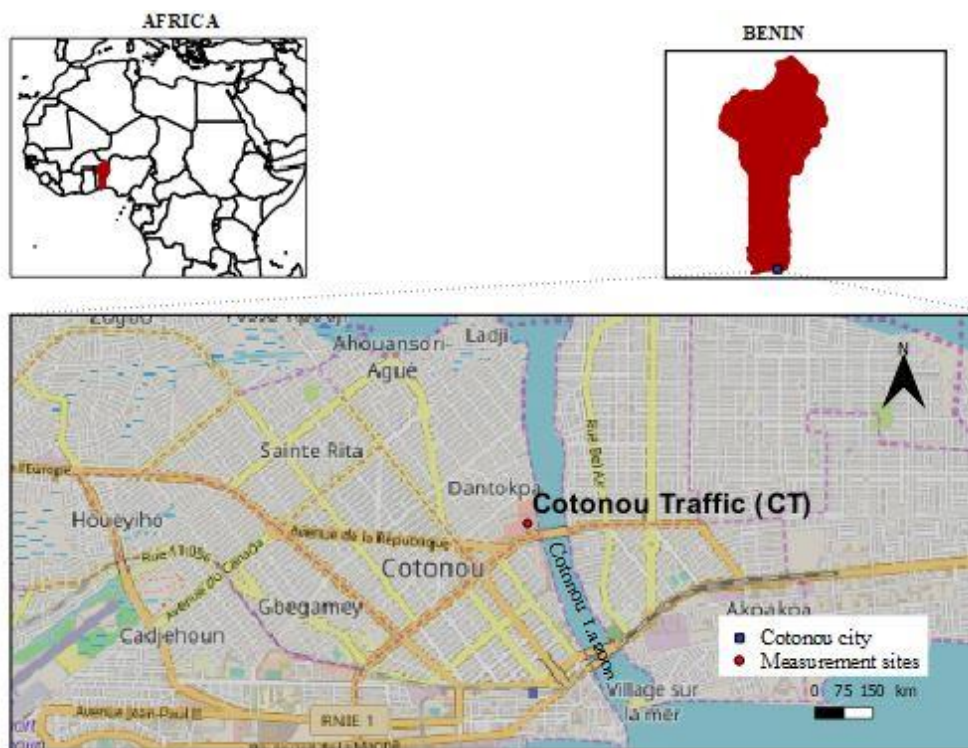

1550

1551

1552 **Figure 2**

1553

1554

1555

1556

1557

1558



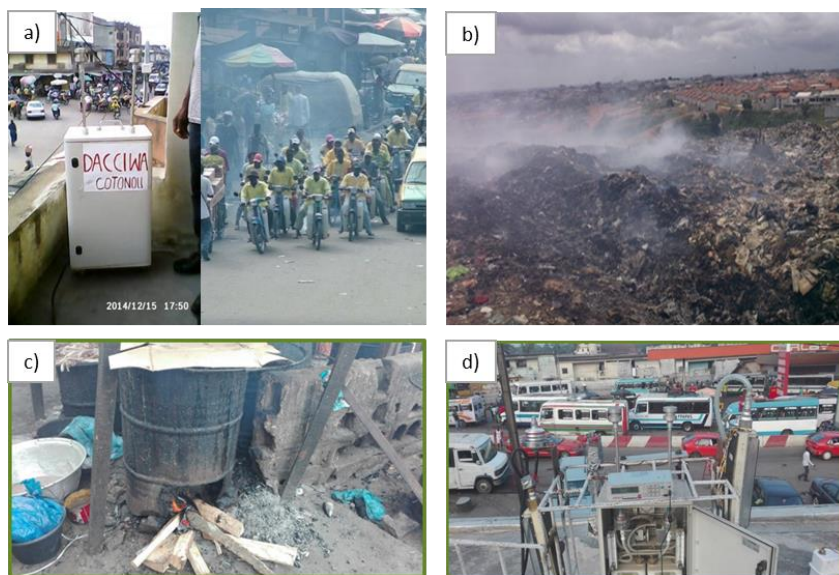

1559

1560 **Figure 3**

1561

1562

1563

1564

1565

1566

1567

1568

1569

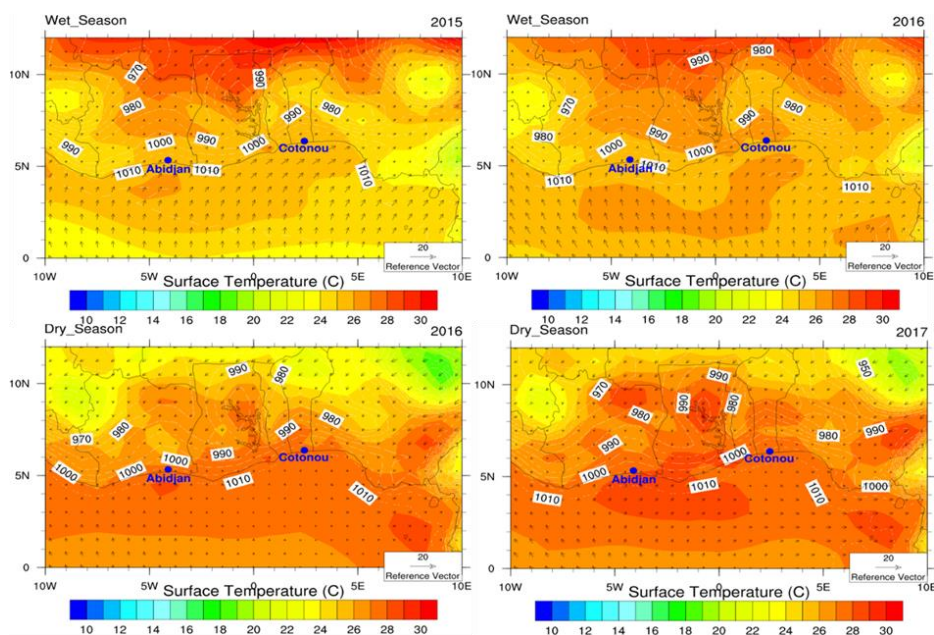

1570

1571

1572 **Figure 4**

1573

1574

1575

1576

1577

1578

1579

1580

1581

1582

1583

1584

1585

1586

1587

1588

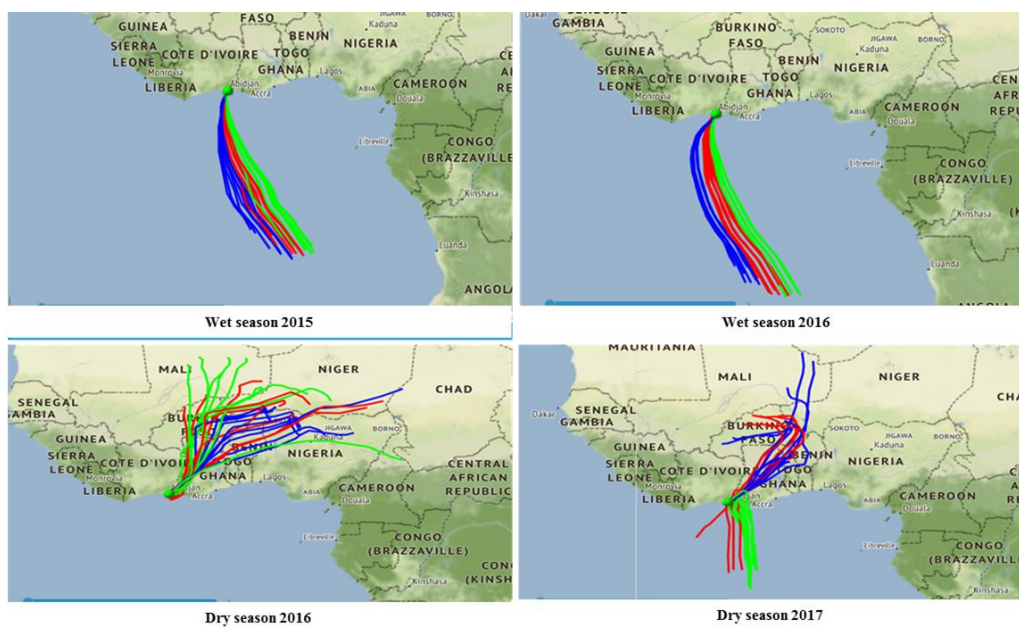

1589

1590 **Figure 5-a**

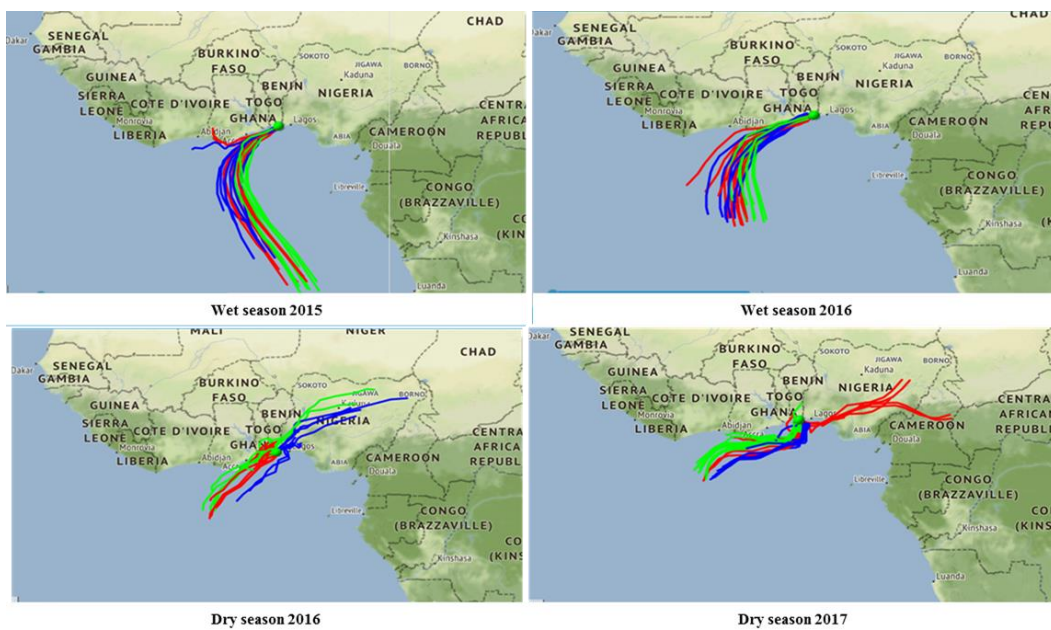

1591

1592 **Figure 5-b**

1593

1594

1595



1596

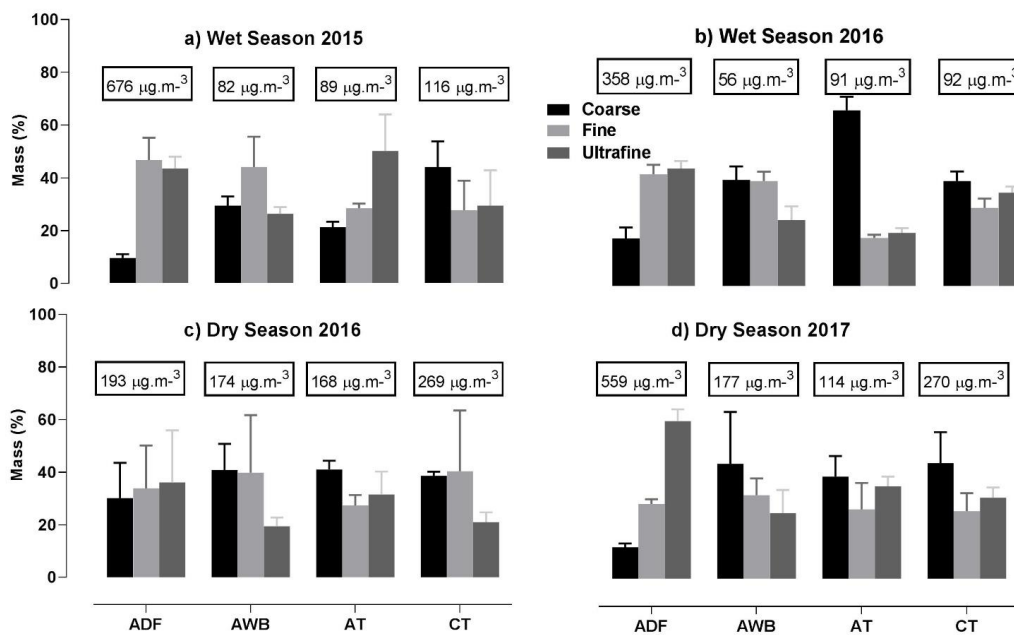

1597

1598 **Figure 6**

1599

1600

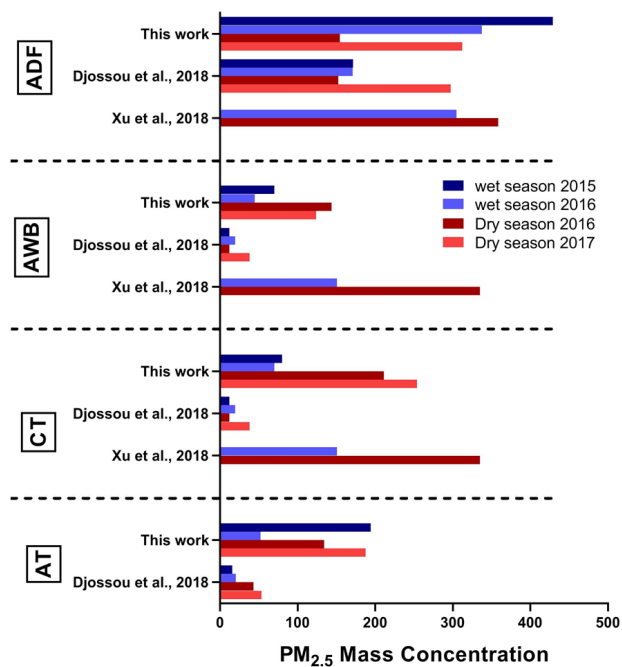

1601

1602 **Figure 7**

1603

1604

1605

1606

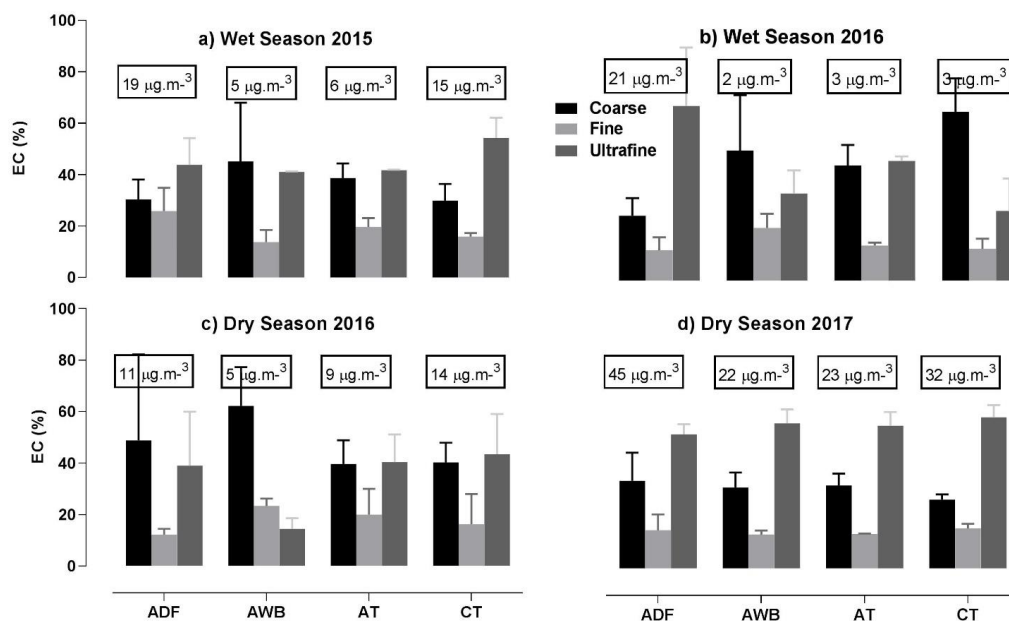

1607

1608 **Figure 8**

1609

1610

1611

1612

1613

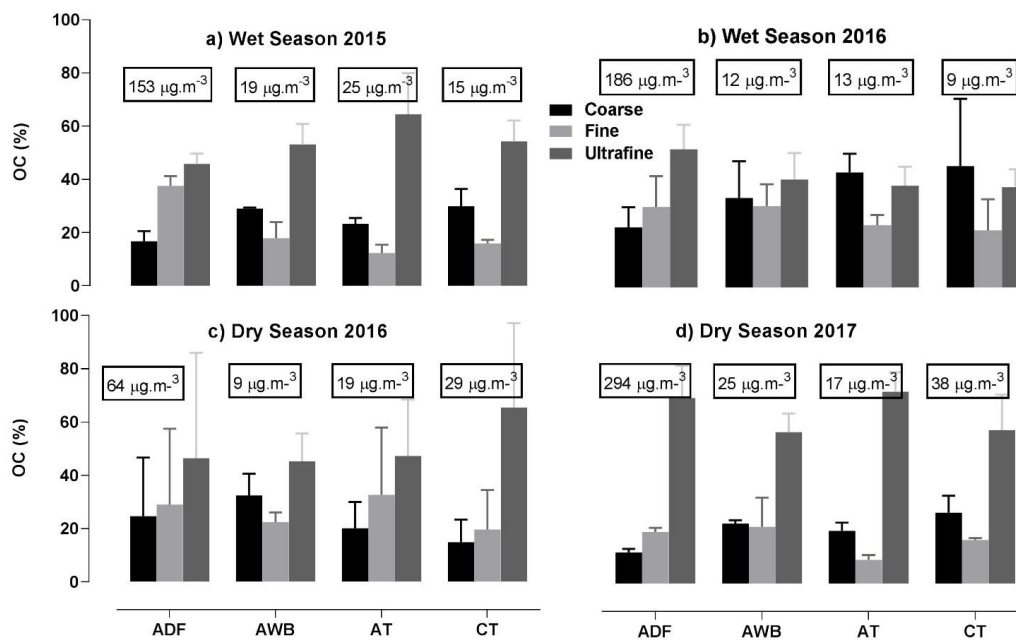

1614

1615 **Figure 9**

1616

1617

1618

1619

1620

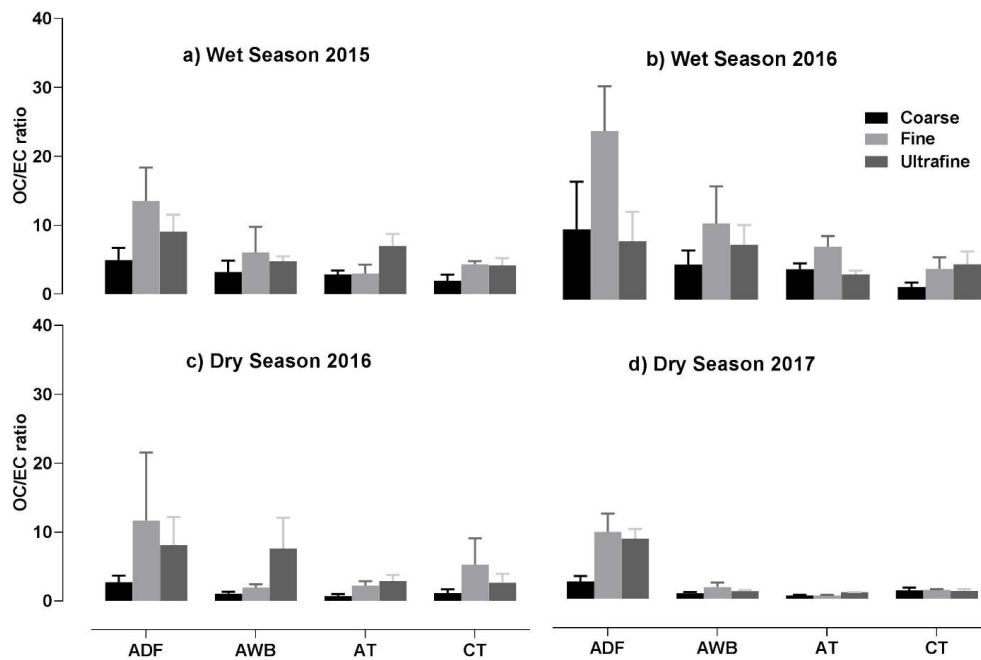

1621

1622 **Figure 10**

1623





1624

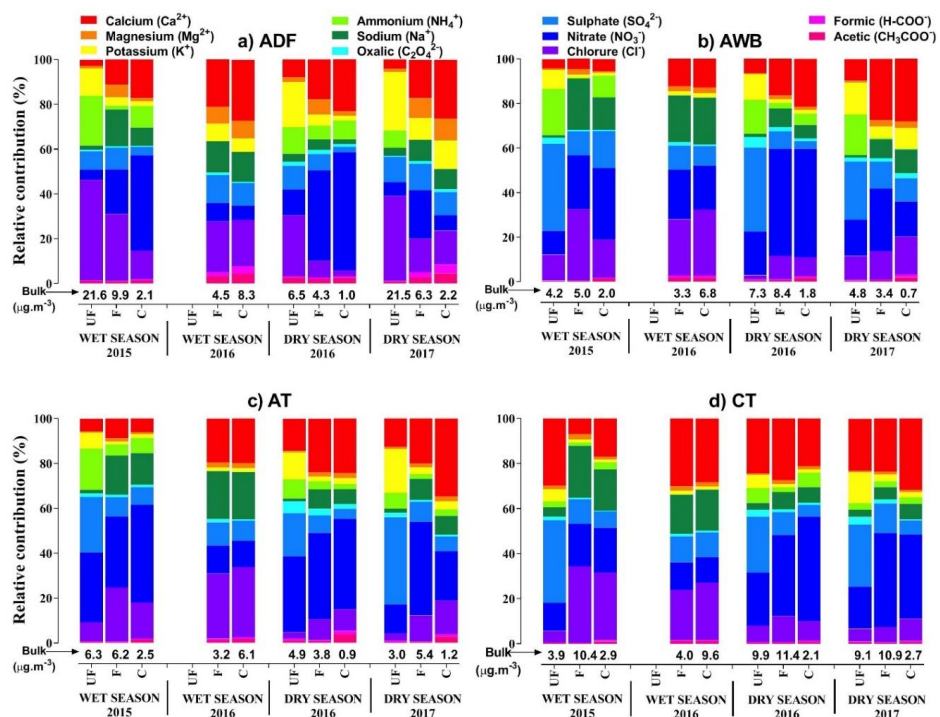

1625

1626 **Figure 11**

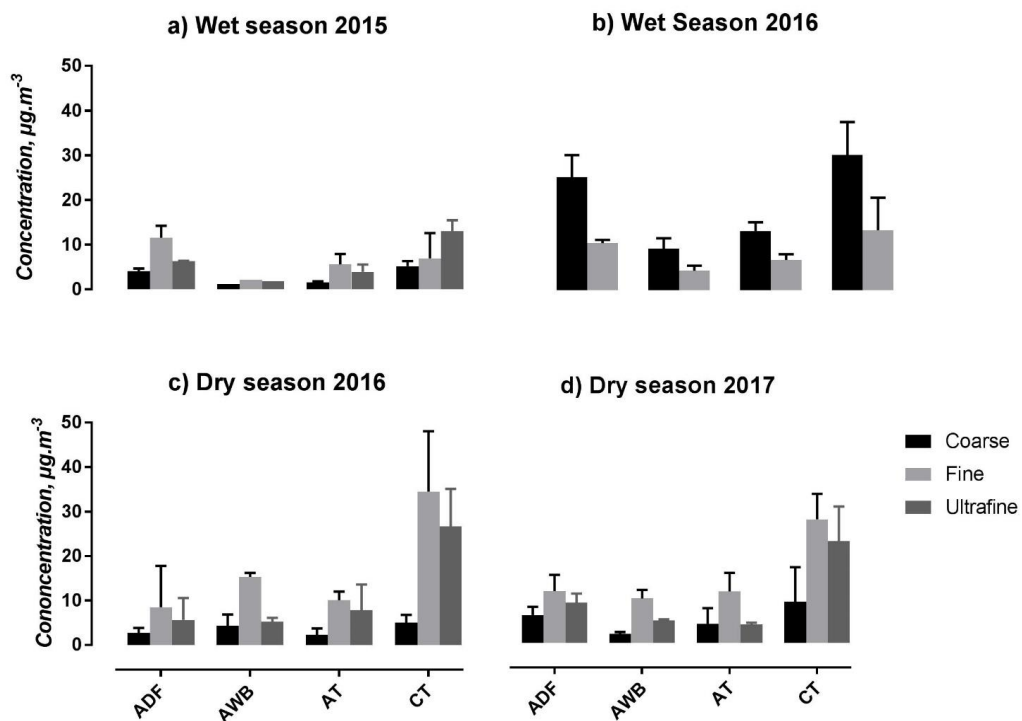

1627

1628 **Figure 12**

1629

1630

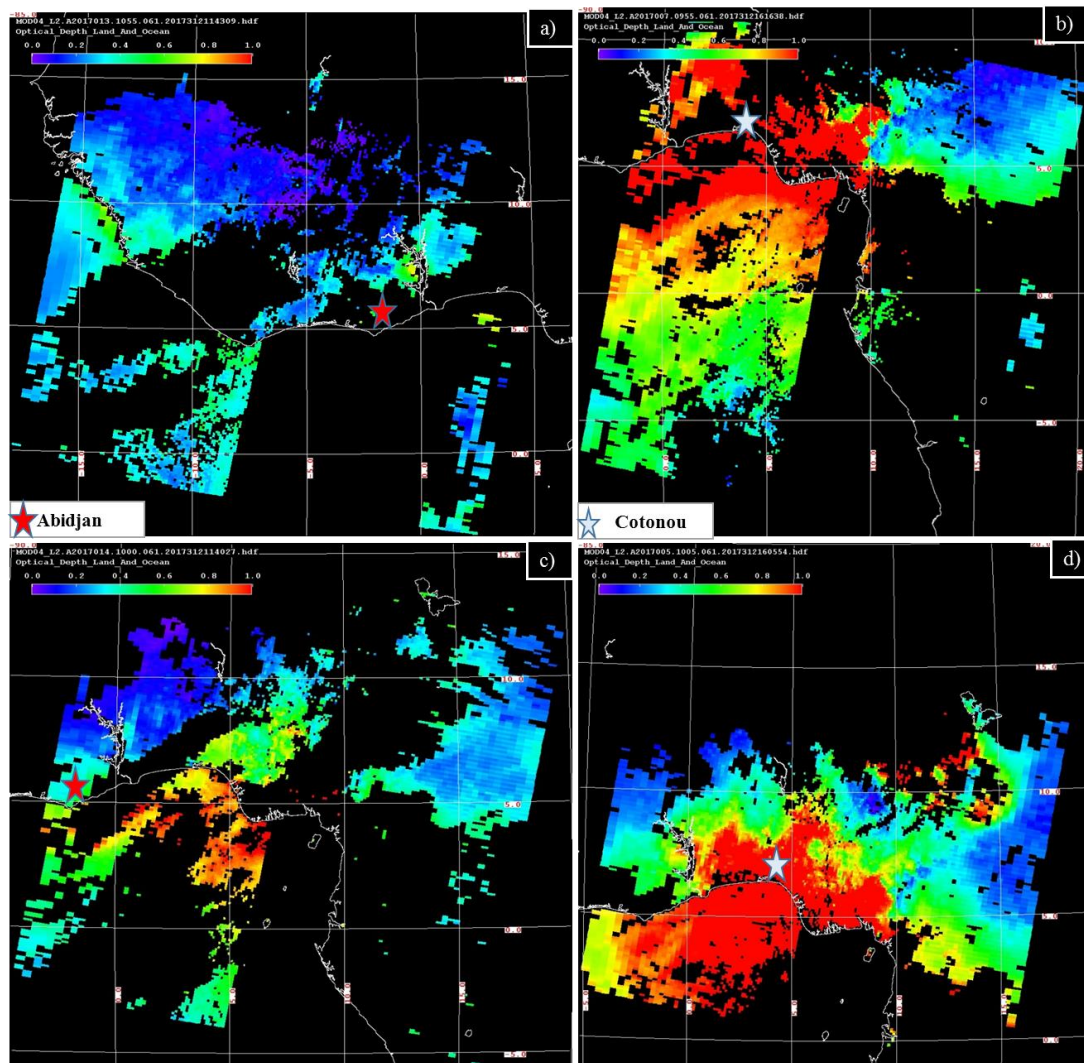

1631

1632 **Figure 13**

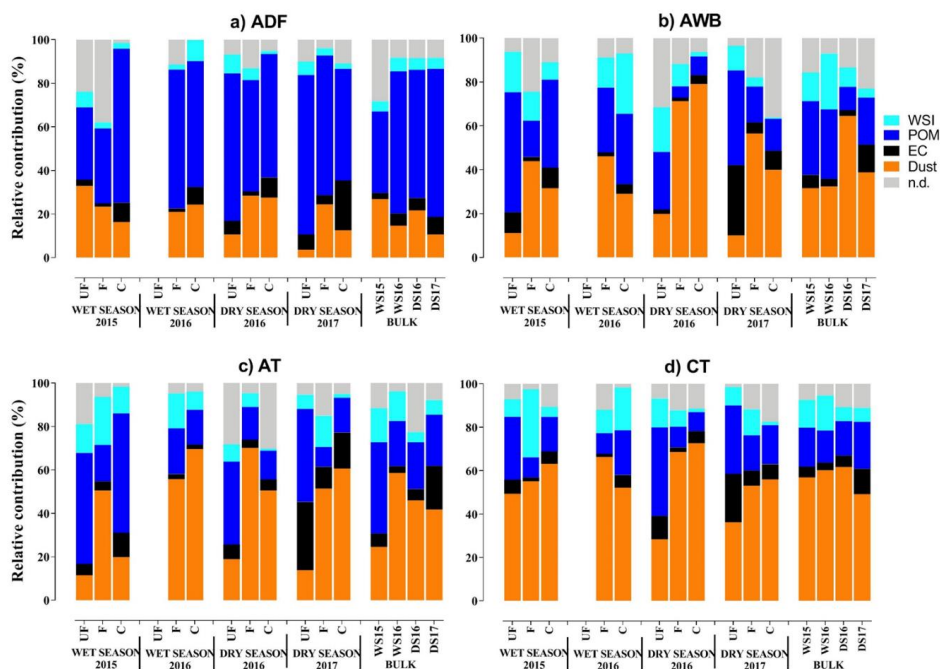

1633

1634 **Figure 14**

1635

1636

1637

1638

1639

1640

1641

1642

1643

1644

1645

1646

1647

1648

1649

1650



1651 Table 1: Comparison of dust concentrations obtained from different methodologies

| Dry 2017 |      | Pettijohn, 1975 | Sciare et al. (2005) | Guinot et al. (2007) | Terzi et al. (2010) | Al    | Fe   |
|----------|------|-----------------|----------------------|----------------------|---------------------|-------|------|
| ADF      | C    | 10.6            | 6.5                  | 12.3                 | 11.5                | 11.3  | 8.6  |
|          | F    | 81.5            | 12.0                 | 38.6                 | 75.4                | 110.3 | 27.6 |
|          | UF   | 15.8            | 9.3                  | 8.4                  | 22.2                | 20.2  | 6.5  |
|          | bulk | 107.9           | 27.7                 | 59.3                 | 109.1               | 141.8 | 42.7 |
| AWB      | C    | 82.8            | 2.1                  | 3.9                  | 74.7                | 115.5 | 22.4 |
|          | F    | 57.6            | 10.2                 | 32.8                 | 51.7                | 75.8  | 51.1 |
|          | UF   | 118.4           | 5.2                  | 31.9                 | 106.4               | 164.0 | 21.7 |
|          | bulk | 258.8           | 17.6                 | 68.5                 | 232.8               | 355.2 | 95.2 |
| AT       | C    | 55.6            | 4.5                  | 5.5                  | 50.3                | 76.6  | 9.0  |
|          | F    | 52.8            | 11.9                 | 15.5                 | 48.2                | 70.2  | 25.1 |
|          | UF   | 37.1            | 4.3                  | 26.8                 | 34.2                | 50.9  | 6.5  |
|          | bulk | 145.5           | 20.7                 | 47.8                 | 132.7               | 197.7 | 40.7 |
| CT       | C    | 42.2            | 9.5                  | 30.0                 | 38.5                | 56.8  | 8.2  |
|          | F    | 65.1            | 28.4                 | -                    | 59.9                | 84.2  | 43.1 |
|          | UF   | 58.6            | 23.4                 | 66.0                 | 55.8                | 77.3  | 33.8 |
|          | bulk | 166.0           | 61.3                 | 96.1                 | 154.2               | 218.3 | 85.2 |

1652

| Wet 2016 |      | Pettijohn, 1975 | Sciare et al., 2005 | Guinot et al., 2007 | Terzi et al. (2010) | Al   | Fe   |
|----------|------|-----------------|---------------------|---------------------|---------------------|------|------|
| ADF      | C    | 13.1            | 25.0                | 14.2                | 15.4                | 10.6 | 16.0 |
|          | F    | 11.5            | 10.4                | 31.7                | 12.5                | 8.7  | 16.8 |
|          | UF   | -               | -                   | -                   | -                   | -    | -    |
|          | Bulk | 24.59           | 35.34               | 45.9                | 27.9                | 19.3 | 32.9 |
| AWB      | C    | 16.7            | 9.2                 | 6.24                | 15.3                | 22.3 | 13.7 |
|          | F    | 6.0             | 4.3                 | 9.82                | 5.7                 | 5.8  | 4.0  |
|          | UF   | -               | -                   | -                   | -                   | -    | -    |
|          | Bulk | 22.65           | 13.46               | 16.1                | 21.1                | 28.1 | 17.7 |
| AT       | C    | 16.6            | 13.0                | 40.4                | 15.1                | 21.9 | 16.4 |
|          | F    | 6.9             | 6.7                 | 8.87                | 6.3                 | 9.0  | 8.3  |
|          | UF   | -               | -                   | -                   | -                   | -    | -    |
|          | Bulk | 23.45           | 19.65               | 49.22               | 21.4                | 30.9 | 24.7 |
| CT       | C    | 45.8            | 29.8                | 18.2                | 43.7                | 48.3 | 27.1 |
|          | F    | 8.7             | 13.2                | 17.2                | 8.8                 | 8.3  | 11.6 |
|          | UF   | -               | -                   | -                   | -                   | -    | -    |
|          | Bulk | 54.51           | 42.98               | 35.4                | 52.5                | 56.6 | 38.7 |



1653 **Table 2:** Comparison of PM<sub>2.5</sub> concentrations with literature data

| Location                  | PM <sub>2.5</sub><br>( $\mu\text{g}/\text{m}^3$ ) | Reference                   |
|---------------------------|---------------------------------------------------|-----------------------------|
| Abidjan, Côte d'Ivoire    | 142                                               | This work                   |
| Cotonou, Benin            | 154                                               | This work                   |
| Beijing, China            | 81.4                                              | Xie et al., 2019            |
| Christchurch, New Zealand | 9.2                                               | Tunno et al., 2019          |
| Pune, India               | $98 \pm 28$                                       | Pipal et al., 2019          |
| Delhi, India              | 123                                               | Guttikunda and Calori, 2013 |
| Lahore, Pakistan          | 91                                                | Colbeck et al., 2011        |
| Ahvaz, Iran               | 69                                                | Shahsavani et al., 2012     |
| Hong Chong, Hong Kong     | $54.7 \pm 25.6$                                   | Cheng et al., 2015          |
| Lecce, Italia             | 16                                                | Cesari et al., 2016         |
| Libreville, Gabon         | 35.8                                              | Ngo et al., 2019            |
| Port Gentille, Gabon      | 60.9                                              |                             |
| Kenitra, Morocco          | 51.3                                              | Zghaid et al., 2009         |
| Bilecik, Turkey           | 247                                               | Gaga et al., 2018           |
| Algiers, Algeria          | 34.8                                              | Bouhila et al., 2015        |
| Shobra, Egypt             | 216                                               | Lowenthal et al., 2015      |

1654

1655

1656



1657 **Table 3:** PM<sub>2.5</sub>-EC and PM<sub>2.5</sub>-OC comparison with Djossou et al. (2018) and Xu et al. (2019)  
 1658 values. Units are µgC/m<sup>3</sup>.

| Location                                   | Period       | PM <sub>2.5</sub> OC | PM <sub>2.5</sub> EC | References          |
|--------------------------------------------|--------------|----------------------|----------------------|---------------------|
|                                            | July 2015    | 22.6 ± 3.4           | 4.3 ± 0.2            | This Work           |
|                                            | January 2016 | 15.2 ± 5.3           | 7.0 ± 2.6            |                     |
|                                            | July 2016    | 9.3 ± 1.3            | 2.2 ± 0.1            |                     |
|                                            | January 2017 | 16.1 ± 1.7           | 18.9 ± 1.4           |                     |
| Traffic Abidjan.<br>Cote d'Ivoire          | July 2015    | 3.3 ± 0.2            | 2.3 ± 0.2            | Djossou et al. 2018 |
|                                            | January 2016 | 7.7 ± 0.0            | 3.9 ± 0.0            |                     |
|                                            | July 2016    | 7.6 ± 0.2            | 4.9 ± 0.0            |                     |
|                                            | January 2017 | 19.1 ± 6.2           | 13.9 ± 5.5           |                     |
|                                            | July 2015    | 13.1 ± 1.2           | 3.5 ± 0.7            | This Work           |
|                                            | January 2016 | 27.8 ± 11.3          | 10.9 ± 2.6           |                     |
|                                            | July 2016    | 6.7 ± 1.9            | 2.0 ± 0.5            |                     |
|                                            | January 2017 | 33.1 ± 4.6           | 27.3 ± 0.9           |                     |
| Traffic Cotonou.<br>Benin                  | July 2015    | 4.2 ± 0.7            | 1.5 ± 0.1            | Djossou et al. 2018 |
|                                            | January 2016 | 3.0 ± 0.3            | 1.5 ± 0.2            |                     |
|                                            | July 2016    | 6.7 ± 0.2            | 1.6 ± 0.1            |                     |
|                                            | January 2017 | 14.5 ± 0.8           | 4.4 ± 0.7            |                     |
|                                            | January 2016 | 49.5 ± 12.5          | 13.6 ± 3.6           | Xu et al. 2019      |
|                                            | July 2016    | 37.0 ± 3.5           | 9.3 ± 0.8            |                     |
| Domestic fire<br>Abidjan.<br>Cote d'Ivoire | July 2015    | 147.2 ± 14.5         | 16.1 ± 1.6           | This Work           |
|                                            | January 2016 | 56.5 ± 51.5          | 7.4 ± 3.1            |                     |
|                                            | July 2016    | 172.3 ± 39.0         | 17.9 ± 4.8           |                     |
|                                            | January 2017 | 283.9 ± 34.9         | 37.9 ± 4.3           |                     |
|                                            | July 2015    | 80.5 ± 1.1           | 32.2 ± 1.6           | Djossou et al. 2018 |
|                                            | January 2016 | 76.3 ± 13.7          | 11.4 ± 0.2           |                     |
|                                            | July 2016    | 68.4 ± 16.5          | 17.4 ± 2.1           |                     |
|                                            | January 2017 | 66.4 ± 7.5           | 21.1 ± 6.6           |                     |
|                                            | January 2016 | 72.4 ± 24.6          | 19.5 ± 7.3           | Xu et al. 2019      |
|                                            | July 2016    | 189.3 ± 197.8        | 11.5 ± 10.8          |                     |
| Waste Burning<br>Abidjan.<br>Cote d'Ivoire | July 2015    | 14.8 ± 1.1           | 4.4 ± 0.1            | This Work           |
|                                            | January 2016 | 7.7 ± 1.3            | 3.0 ± 0.3            |                     |
|                                            | July 2016    | 10.0 ± 2.4           | 1.5 ± 0.3            |                     |
|                                            | January 2017 | 21.9 ± 4.2           | 19.2 ± 2.4           |                     |
|                                            | July 2015    | 3.7 ± 2.2            | 4.3 ± 0.3            | Djossou et al. 2018 |
|                                            | January 2016 | 13.9 ± 9.0           | 3.6 ± 1.8            |                     |
|                                            | July 2016    | 9.8 ± 4.4            | 2.8 ± 0.9            |                     |
|                                            | January 2017 | 22.4 ± 7.8           | 8.7 ± 3.0            |                     |
|                                            | January 2016 | 85 ± 57.4            | 15 ± 4.7             | Xu et al. 2019      |
|                                            | July 2016    | 65.2 ± 65.2          | 12.3 ± 11.4          |                     |

1659

1660

1661

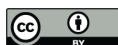

1662 **Table 4:** EC and OC comparison with literature values

| Location                | OC ( $\mu\text{g}/\text{m}^3$ ) | BC ( $\mu\text{g}/\text{m}^3$ ) | Reference                                 |
|-------------------------|---------------------------------|---------------------------------|-------------------------------------------|
| Abidjan (Côte d'Ivoire) | 16                              | 8.1                             | This study                                |
| Cotonou (Benin)         | 20.2                            | 11                              | This study                                |
| Bilecik (Turkey)        | 49.6-62.8                       | 38.8-58.1                       | Gaga et al., 2018                         |
| Pune (India)            | 30                              | 5                               | Pipal et al., 2019                        |
| Shanghai (China)        | 4.9-13.1                        | 1.9-5                           | Ding et al., 2017                         |
| Lahore (Pakistan)       | 85.7-152                        | 13.8-21                         | Stone et al., 2010                        |
| Agra (India)            | 25.4-70                         | 3.3-9.5                         | Satsangi et al., 2012, Pipal et al., 2014 |
| Delhi (India)           | 34.1-50                         | 5.3-10.6                        | Bisht et al., 2015a, Pipal et al., 2014   |
| Ahmedabad (India)       | 18.3                            | 3                               | Rengarajan et al., 2011                   |
| Yokohama (Japan)        | 4                               | 2                               | Khan et al., 2010                         |
| Beijing (China)         | 2.9-28.2                        | 1.2-16.3                        | Guinot et al., 2007                       |

1663

1664



1665 **Table 5:** WSOC concentrations and WSOC/OC ratios for each site, each campaign and each aerosol  
 1666 size

| Site               |            | Abidjan Waste Burning             |             | Abidjan Domestic Fire             |             |
|--------------------|------------|-----------------------------------|-------------|-----------------------------------|-------------|
| Period             | Size       | WSOC ( $\mu\text{g}/\text{m}^3$ ) | WSOC/OC (%) | WSOC ( $\mu\text{g}/\text{m}^3$ ) | WSOC/OC (%) |
| Wet season<br>2015 | Coarse     | 1.3                               | 24.6        | 8.2                               | 32.5        |
|                    | Fine       | 0.7                               | 19.9        | 12.8                              | 22.7        |
|                    | Ultra fine | 4.1                               | 43.6        | 51.3                              | 72.5        |
|                    | PM2.5      | 5.5                               | 33.7        | 69.5                              | 47.2        |
| Dry season<br>2016 | Coarse     | 0.4                               | 12.3        | 4.4                               | 18.8        |
|                    | Fine       | 0.9                               | 46.9        | 7.0                               | 20.4        |
|                    | Ultra fine | 1.5                               | 38.4        | 21.9                              | 61.5        |
|                    | PM2.5      | 2.7                               | 32.7        | 31.0                              | 32.0        |
| Wet season<br>2016 | Coarse     | 1.3                               | 42.5        | 16.5                              | 44.3        |
|                    | Fine       | 0.8                               | 26.3        | 17.1                              | 33.0        |
|                    | Ultra fine | 2.0                               | 41.2        | 79.7                              | 84.5        |
|                    | PM2.5      | 3.5                               | 37.1        | 106.0                             | 52.0        |
| Dry season<br>2017 | Coarse     | 1.9                               | 32.9        | 12.1                              | 36.0        |
|                    | Fine       | 1.4                               | 38.4        | 19.9                              | 35.0        |
|                    | Ultra fine | 1.6                               | 11.5        | 38.6                              | 19.0        |
|                    | PM2.5      | 4.0                               | 30.0        | 65.8                              | 29.0        |

1667

1668

1669 **Table 5 (suite):** WSOC concentrations and WSOC/OC ratios for each site, each campaign and each  
 1670 aerosol size

| Site               |            | Abidjan Traffic                   |             | Cotonou Traffic                   |             |
|--------------------|------------|-----------------------------------|-------------|-----------------------------------|-------------|
| Period             | Size       | WSOC ( $\mu\text{g}/\text{m}^3$ ) | WSOC/OC (%) | WSOC ( $\mu\text{g}/\text{m}^3$ ) | WSOC/OC (%) |
| Wet season<br>2015 | Coarse     | 2.4                               | 39.6        | 1.1                               | 23.3        |
|                    | Fine       | 1.3                               | 46.7        | 0.5                               | 22.1        |
|                    | Ultra fine | 4.7                               | 29.0        | 0.4                               | 12.7        |
|                    | PM2.5      | 6.9                               | 34.0        | 2.2                               | 18.0        |
| Dry season<br>2016 | Coarse     | 1.4                               | 43.0        | 2.3                               | 64.1        |
|                    | Fine       | 1.9                               | 59.0        | 0.6                               | 10.5        |
|                    | Ultra fine | 4.9                               | 62.0        | 6.3                               | 42.9        |
|                    | PM2.5      | 7.5                               | 49.4        | 8.0                               | 29.0        |
| Wet season<br>2016 | Coarse     | 1.1                               | 23.1        | 1.2                               | 34.7        |
|                    | Fine       | 0.5                               | 16.8        | 0.5                               | 32.2        |
|                    | Ultra fine | 1.4                               | 34.8        | 0.9                               | 23.0        |
|                    | PM2.5      | 2.4                               | 26.0        | 1.9                               | 28.0        |
| Dry season<br>2017 | Coarse     | 0.9                               | 24.0        | 3.5                               | 37.8        |
|                    | Fine       | 0.3                               | 24.3        | 2.4                               | 39.6        |
|                    | Ultra fine | 1.8                               | 14.8        | 1.9                               | 10.4        |
|                    | PM2.5      | 2.6                               | 16.0        | 6.0                               | 18.2        |



1671

1672 **Table 6:** Comparison of WSOC concentrations with literature data

| Location                        | WSOC ( $\mu\text{g}/\text{m}^3$ ) | Reference                                     |
|---------------------------------|-----------------------------------|-----------------------------------------------|
| Abidjan, Côte d'Ivoire          | 2-8                               | This work                                     |
| Cotonou, Benin                  | 2-8                               | This work                                     |
| Beijing, China                  | 9-27                              | Yu et al., 2018                               |
| Beijing, China                  | 4-6                               | Xiang et al., 2017                            |
| Beijing, China                  | 8-12                              | Tang et al., 2016                             |
| Beijing, China                  | 7                                 | Du et al., 2014                               |
| Beijing, China                  | 6-8                               | Feng et al., 2006                             |
| Shanghai, China                 | 2-7                               | Feng et al., 2006, Huang et al., 2012         |
| Guangzhou, Hong Kong            | 2                                 | Huang et al., 2012                            |
| Guangzhou, Hong Kong            | 5-10                              | Feng et al., 2006                             |
| Gwangju, Korea                  | 2-3.5                             | Park et al., 2015                             |
| Tokyo, Japan                    | 3-23                              | Sempere and Kawamura, 1994                    |
| Cairo, Egypt                    | 3                                 | Favez et al., 2008                            |
| Amsterdam, Netherland           | 1-2                               | Feng et al., 2007                             |
| Barcelone, Spain                | 1-2                               | Viana et al., 2007 and 2008                   |
| Brindisi, Italy                 | 1.5                               | Genga et al., 2017                            |
| Saint Jean de Maurienne, France | 1-5                               | Sullivan et al., 2004, Jaffrezo et al., 2005a |

1673

1674

1675 **Table 7** : Trace element concentrations for bulk aerosol for each site and for DS2017 and WS2016.

|    | Bulk ng/m <sup>3</sup> (%) |                |                 |               |              |              |              |               |
|----|----------------------------|----------------|-----------------|---------------|--------------|--------------|--------------|---------------|
|    | DRY 2017                   |                |                 |               | WET 2016     |              |              |               |
|    | ADF                        | AWB            | AT              | CT            | ADF          | AWB          | AT           | CT            |
| Al | 10050.8 (1.8)              | 25186.1 (13.7) | 14015.8 (12.26) | 15480.4 (5.7) | 1370.5 (0.4) | 1990.1 (3.5) | 2191.4 (2.4) | 4010.5 (4.4)  |
| K  | 8634.3 (1.5)               | 6093.7 (3.3)   | 3677.7 (3.22)   | 5068.9 (1.9)  | 1105.0 (0.3) | 472.0 (0.8)  | 275.9 (0.3)  | 1076.0 (1.2)  |
| Na | 6847.8 (1.2)               | 23430.5 (12.8) | 15372.1 (13.44) | 11529.3 (4.3) | 2070.6 (0.6) | 3735.4 (6.6) | 2861.5 (3.1) | 5310.2 (5.8)  |
| Ca | 4321.2 (0.8)               | 2923.7 (1.6)   | 4117.6 (3.60)   | 6233.5 (2.3)  | 4124.7 (1.1) | 447.5 (0.8)  | 374.7 (0.4)  | 4954.02 (5.4) |
| Mg | 1940.6 (0.3)               | 384.0 (0.2)    | 410.3 (0.36)    | 823.2 (0.3)   | 1524.7 (0.4) | 294.9 (0.5)  | 283.5 (0.3)  | 619.2 (0.7)   |
| Fe | 1709.9 (0.3)               | 3807.9 (2.1)   | 1628.1 (1.42)   | 3406.8 (1.3)  | 1314.0 (0.4) | 709.3 (1.3)  | 987.3 (1.1)  | 1549.4 (1.7)  |
| P  | 1521.9 (0.3)               | 696.0 (0.4)    | 147.8 (0.13)    | 207.4 (0.1)   | 605.4 (0.2)  | 8.6          | 13.2         | 81.4 (0.1)    |
| Ti | 488.9 (0.1)                | 2270.3 (1.2)   | 282.8 (0.25)    | 457.9 (0.17)  | 170.8 (0.05) | 75.7 (0.13)  | 96.8 (0.11)  | 154.7 (0.17)  |
| Zn | 189.7 (0.03)               | 80.9 (0.04)    | 57.9 (0.05)     | 149.4 (0.06)  | 60.3 (0.02)  | 1.9          | 41.1 (0.04)  | 36.2 (0.04)   |
| Zr | 172.1 (0.03)               | 390.3 (0.21)   | 217.9 (0.19)    | 145.3 (0.05)  | -            | 22.4 (0.04)  | 36.7 (0.04)  | 31.2 (0.03)   |
| Pb | 87.1 (0.02)                | 11.0 (0.01)    | 4.8             | 11.5          | 8.3          | 2.1          | 2.3          | 9.3 (0.01)    |
| Sn | 79.7 (0.01)                | 38.4 (0.02)    | 21.6 (0.02)     | 37.4 (0.01)   | 0.77         | 0.09         | 0.0006       | 9.ç (0.01)    |
| Mn | 74.2 (0.01)                | 35.2 (0.02)    | 33.7 (0.03)     | 160.6 (0.06)  | 48.9 (0.01)  | 12.01 (0.02) | 9.1 (0.01)   | 41.41 (0.05)  |
| Rb | 52.4 (0.01)                | 8.7            | 5.9 (0.01)      | 8.5           | 4.47         | 0.71         | 0.85         | 1.9           |
| Sb | 59.9 (0.01)                | 201.2 (0.11)   | 123.6 (0.11)    | 149.04 (0.06) | 24.4 (0.01)  | 0            | 0.0006       | 2.9           |
| Ba | 37.3 (0.01)                | 53.3 (0.03)    | 47.4 (0.04)     | 65.8 (0.02)   | 18.5         | 8.02 (0.01)  | 9.9 (0.01)   | 32.0 (0.03)   |
| Ni | 36.5 (0.01)                | 34.5 (0.02)    | 27.9 (0.02)     | 50.2 (0.02)   | 18.00        | 33.1 (0.06)  | 9.7 (0.01)   | 14.9 (0.02)   |
| Cr | 29.4 (0.01)                | 53.8 (0.03)    | 35.8 (0.03)     | 28.6 (0.01)   | 41.9 (0.01)  | 47.7 (0.08)  | 24.3 (0.03)  | 29.7 (0.03)   |
| Sr | 28.1 (0.01)                | 15.5 (0.01)    | 21.2 (0.02)     | 34.02 (0.01)  | 17.02        | 0            | 0.19         | 8.1 (0.01)    |
| Cu | 24.0                       | 12.3 (0.01)    | 3.6             | 9.6           | 3.99         | 0.26         | 0.87         | 2.8           |
| Sr | 12.6                       | -              | -               | -             | 17.1         | -            | 0.22         | 8.9 (0.01)    |
| Li | 7.3                        | 15.5 (0.01)    | 7.8 (0.01)      | 7.39          | 0.36         | 0.32         | 0.23         | 0.75          |
| Cd | 6.1                        | 1.6            | 1.0             | 0.83          | 1.18         | 0.05         | 0.02         | 0.17          |
| V  | 5.5                        | 12.4 (0.01)    | 5.1             | 10.62         | 2.14         | 1.84         | 2.0          | 3.35          |
| Mo | 5.5                        | 8.0            | 4.9             | 3.19          | 4.56         | 6.84 (0.01)  | 2.04         | 3.2           |
| Cs | 5.4                        | 0.9            | 1.2             | 0.94          | 0.11         | 0.12         | 0.01         | 0.17          |
| Hf | 4.5                        | 10.8 (0.01)    | 6.8 (0.01)      | 4.63          | 0            | 0.67         | 1.03         | 0.97          |
| As | 4.2                        | 4.5            | 3.1             | 1.22          | 0            | 0 (0)        | 0.05         | 0.60          |
| Li | 4.0                        | 9.8            | 5.9 (0.01)      | 5.82          | 0.27         | 0.37         | 0.16         | 0.93          |
| Co | 3.8                        | 1.1            | 2.1             | 35.67 (0.01)  | 0.86         | 0.49         | 0.13         | 0.33          |
| Ce | 3.7                        | 6.8            | 6.0 (0.01)      | 9.85          | 1.06         | 0.50         | 0.42         | 2.03          |
| La | 1.8                        | 3.5            | 2.9             | 4.78          | 0.54         | 0.24         | 0.25         | 0.92          |
| Nb | 1.5                        | 2.6)           | 1.4             | 2.48          | 0.98         | 0.46         | 0.5          | 0.63          |
| Nd | 1.5                        | 2.5            | 2.4             | 4.15          | 0.05         | 0 (0)        | -            | 0.40          |
| Sc | 0.69                       | 1.4            | 1.1)            | 1.31          |              | 0.00         |              | 0.02          |
| Be | 0.13                       | 0.19           | 0.2             | 0.28          | 0.003        | -            | -            | 0.03          |
| Ga | 0.61                       | 1.15           | 0.8             | 0.98          | 0.2          | 0.11         | 0.12         | 0.37          |
| Ge | 0.42                       | 1.02           | 0.8             | 0.68          | 0.01         | 0.07         | 0.02         | 0.11          |
| Se | 0.91                       | -              | -               | 0.02          | 0.59         | -            | 0.20         | 0.18          |
| Rh | 0.02                       | 0.02           | 0.00002         | 0.002         | -            | 0.002        |              | 0.0002        |
| Te | 0.06                       | 0.08           | 0.08            | 0.05          | 0.02         | 0.02         | 0.02         | 0.00          |
| Pr | 0.40                       | 0.74           | 0.7             | 1.13          | 0.06         | 0.01         | 0.004        | 0.15          |
| Sm | 0.27                       | 0.46           | 0.45            | 0.76          | 0.01         | 0.00         | -            | 0.07          |
| Eu | 0.05                       | 0.08           | 0.08            | 0.15          | 0.01         | 0.003        | --           | 0.0           |
| Gd | 0.31                       | 0.57           | 0.54            | 0.86          | 0.05         | 0.02         | 0.001        | 0.15          |
| Tb | 0.04                       | 0.07           | 0.07            | 0.10          | 0.005        | -            | -            | 0.02          |
| Dy | 0.24                       | 0.42           | 0.40            | 0.57          | 0.001        | -            | -            | 0.05          |
| Ho | 0.05                       | 0.09           | 0.09            | 0.12          | 0.01         | 0.008        | 0.01         | 0.03          |
| Er | 0.16                       | 0.31           | 0.28            | 0.35          | 0.02         | 0.03         | 0.02         | 0.09          |



68

|                                                  |         |         |         |         |         |        |        |         |
|--------------------------------------------------|---------|---------|---------|---------|---------|--------|--------|---------|
| <b>Tm</b>                                        | 0.02    | 0.05    | 0.05    | 0.05    | 0.002   | 0.003  | 0.001  | 0.01    |
| <b>Yb</b>                                        | 0.18    | 0.38    | 0.32    | 0.34    | 0.01    | 0.02   | 0.03   | 0.09    |
| <b>Lu</b>                                        | 0.03    | 0.06    | 0.08    | 0.06    | 0.003   | 0.005  | 0.005  | 0.02    |
| <b>Ta</b>                                        | 0.07    | 0.14    | 0.09    | 0.16    | 0.06    | 0.02   | 0.02   | 0.03    |
| <b>W</b>                                         | 0.80    | 1.63    | 0.69    | 0.54    | 0.26    | 0.41   | 0.4    | 0.3     |
| <b>Tl</b>                                        | 0.22    | 0.01    | 0.03    | 0.06    |         | 0.009  |        |         |
| <b>Bi</b>                                        | 0.32    | 0.26    | 0.02    | 0.08    | 0.06    | -      | -      | 0.08    |
| <b>Th</b>                                        | 0.41    | 0.88    | 0.79    | 1.29    | 0.15    | 0.09   | 0.09   | 0.24    |
| <b>U</b>                                         | 0.22    | 0.43    | 0.49    | 0.51    | 0.03    | 0.03   | 0.02   | 0.09    |
| <b>Total</b>                                     | 36459.9 | 65817.6 | 40312.2 | 44159.2 | 12562.9 | 7874.7 | 7227.2 | 18001.1 |
| <b>Mass(<math>\mu\text{g}/\text{m}^3</math>)</b> | 558.8   | 183.6   | 114.4   | 270.0   | 374.7   | 56.3   | 91.6   | 91.9    |

1676

1677

1678



1679 Table 8: Selected trace element ratios for bulk particles, for each site and for WS2016 and DS2017

|              | ADF           |             | AWB         |             | AT              |             | CT          |             |
|--------------|---------------|-------------|-------------|-------------|-----------------|-------------|-------------|-------------|
|              | WET 2016      | DRY 2017    | WET 2016    | DRY 2017    | WET 2016        | DRY 2017    | WET 2016    | DRY 2017    |
| <b>Cu/Sb</b> | 0.28 ± 0.21   | 0.56 ± 0.21 | -           | 0.08 ± 0.08 | 1982.3 ± 1743.7 | 0.02 ± 0.01 | 0.57        | 0.19 ± 0.16 |
| <b>As/V</b>  | -             | 0.78 ± 0.17 | -           | 0.41 ± 0.10 | 0.07            | 0.29 ± 0.01 | 0.15 ± 0.19 | 0.15 ± 0.06 |
| <b>V/Ni</b>  | 0.13 ± 0.03   | 0.21 ± 0.16 | 0.04 ± 0.01 | 0.36 ± 0.16 | 0.28 ± 0.15     | 0.16 ± 0.02 | 0.46 ± 0.37 | 0.33 ± 0.17 |
| <b>Zn/Pb</b> | 7.1 ± 3.4     | 2.8 ± 1.3   | 2.30        | 13.2 ± 5.6  | 19.9 ± 14.7     | 14.8 ± 3.8  | 3.26 ± 2.31 | 18.5 ± 8.5  |
| <b>Zn/Cd</b> | 133.9 ± 109.4 | 29.1 ± 5.3  | 19.6 ± 25.9 | 55.9 ± 17.3 | 3932 ± 5061     | 51.7 ± 5.2  | 200±122     | 266.5±130.9 |

1681

1682

1683

1684

1685

1686

1687

1688

1689

1690

1691

1692

1693

1694

1695

1696

1697

1698

1699

1700

1701

1702

1703

1704

1705

1706

1707
